# Supplementary material for: Melatonin Signaling Pathways Implicated in Metabolic Processes in Human Granulosa Cells (KGN)
Source: MDPI journal article supplement (doi:10.3390/ijms23062988), 2022-03-10
Supplement: s1 [file s1]

**Table S1.** List of DEGs in melatonin treatment (FC = 0, adjusted *p*-value ≤ 0.05).

| <i>Symbol</i>       | <i>Entrez Gene Name</i>                                                  | <i>ENSEMBL</i>  | <i>Expr Log Ratio</i> | <i>Expr p-Value</i> |
|---------------------|--------------------------------------------------------------------------|-----------------|-----------------------|---------------------|
| <i>AMOTL2</i>       | angiomin like 2                                                          | ENSG00000114019 | 0.277                 | 1.00E-02            |
| <i>AP4S1</i>        | adaptor related protein complex 4 subunit sigma 1                        | ENSG00000100478 | -0.711                | 1.00E-02            |
| <i>HELQ</i>         | helicase, POLQ like                                                      | ENSG00000163312 | 0.739                 | 1.00E-02            |
| <i>ORC2</i>         | origin recognition complex subunit 2                                     | ENSG00000115942 | -0.427                | 1.00E-02            |
| <i>PREX1</i>        | phosphatidylinositol-3,4,5-trisphosphate dependent Rac exchange factor 1 | ENSG00000124126 | -0.636                | 1.00E-02            |
| <i>TIMM13</i>       | translocase of inner mitochondrial membrane 13                           | ENSG00000099800 | -0.284                | 1.00E-02            |
| <i>TOMM40L</i>      | translocase of outer mitochondrial membrane 40 like                      | ENSG00000158882 | 0.626                 | 1.00E-02            |
| <i>TRMT112</i>      | tRNA methyltransferase subunit 11-2                                      | ENSG00000173113 | -0.244                | 1.00E-02            |
| <i>ZNF707</i>       | zinc finger protein 707                                                  | ENSG00000181135 | -0.590                | 1.00E-02            |
| <i>OXLD1</i>        | oxidoreductase like domain containing 1                                  | ENSG00000204237 | 0.597                 | 1.00E-03            |
| <i>THOC1</i>        | THO complex 1                                                            | ENSG00000079134 | -0.633                | 1.00E-03            |
| <i>AE00065822</i>   |                                                                          | ENSG00000257096 | -1.515                | 1.10E-02            |
| <i>C4orf36</i>      | chromosome 4 open reading frame 36                                       | ENSG00000163633 | -1.918                | 1.10E-02            |
| <i>COL8A2</i>       | collagen type VIII alpha 2 chain                                         | ENSG00000171812 | -1.918                | 1.10E-02            |
| <i>COLQ</i>         | collagen like tail subunit of asymmetric acetylcholinesterase            | ENSG00000206561 | -1.189                | 1.10E-02            |
| <i>FHL3</i>         | four and a half LIM domains 3                                            | ENSG00000183386 | 0.459                 | 1.10E-02            |
| <i>GAS1</i>         | growth arrest specific 1                                                 | ENSG00000180447 | -1.276                | 1.10E-02            |
| <i>KMT5C</i>        | lysine methyltransferase 5C                                              | ENSG00000133247 | 0.581                 | 1.10E-02            |
| <i>LINC00894</i>    | long intergenic non-protein coding RNA 894                               | ENSG00000235703 | 1.837                 | 1.10E-02            |
| <i>LOC101928069</i> | uncharacterized LOC101928069                                             | ENSG00000255517 | 0.906                 | 1.10E-02            |
| <i>NEK11</i>        | NIMA related kinase 11                                                   | ENSG00000114670 | -0.730                | 1.10E-02            |
| <i>PCCA-DT</i>      | PCCA divergent transcript                                                | ENSG00000274605 | 1.625                 | 1.10E-02            |
| <i>PLAUR</i>        | plasminogen activator, urokinase receptor                                | ENSG00000011422 | -0.332                | 1.10E-02            |
| <i>RIPOR1</i>       | RHO family interacting cell polarization regulator 1                     | ENSG00000039523 | 0.541                 | 1.10E-02            |
| <i>RP9P</i>         | RP9 pseudogene                                                           | ENSG00000205763 | -0.646                | 1.10E-02            |
| <i>SEC23B</i>       | SEC23 homolog B, coat complex II component                               | ENSG00000101310 | 0.325                 | 1.10E-02            |
| <i>SLC27A3</i>      | solute carrier family 27 member 3                                        | ENSG00000143554 | -1.189                | 1.10E-02            |
| <i>SLFN12L</i>      | schlafen family member 12 like                                           | ENSG00000205045 | 1.837                 | 1.10E-02            |
| <i>TDRD7</i>        | tudor domain containing 7                                                | ENSG00000196116 | -0.505                | 1.10E-02            |
| <i>ZNF674</i>       | zinc finger protein 674                                                  | ENSG00000251192 | 1.311                 | 1.10E-02            |
| <i>AC0059436</i>    |                                                                          | ENSG00000279009 | 0.428                 | 1.20E-02            |
| <i>CHCHD10</i>      | coiled-coil-helix-coiled-coil-helix domain containing 10                 | ENSG00000250479 | -2.612                | 1.20E-02            |
| <i>CSF1</i>         | colony stimulating factor 1                                              | ENSG00000184371 | -0.417                | 1.20E-02            |
| <i>CTSL</i>         | cathepsin L                                                              | ENSG00000135047 | -0.222                | 1.20E-02            |
| <i>DCTN3</i>        | dynactin subunit 3                                                       | ENSG00000137100 | -0.315                | 1.20E-02            |
| <i>ELMO3</i>        | engulfment and cell motility 3                                           | ENSG00000102890 | 1.025                 | 1.20E-02            |
| <i>ELP2</i>         | elongator acetyltransferase complex subunit 2                            | ENSG00000134759 | -0.319                | 1.20E-02            |
| <i>FAM111A-DT</i>   | FAM111A divergent transcript                                             | ENSG00000245571 | -0.915                | 1.20E-02            |

|                       |                                            |                 |        |          |
|-----------------------|--------------------------------------------|-----------------|--------|----------|
| <i>ITGA10</i>         | integrin subunit alpha 10                  | ENSG00000143127 | 1.414  | 1.20E-02 |
| <i>JAK2</i>           | Janus kinase 2                             | ENSG00000096968 | 0.438  | 1.20E-02 |
| <i>KANK1</i>          | KN motif and ankyrin repeat domains 1      | ENSG00000107104 | -0.391 | 1.20E-02 |
| <i>LIMD1-AS1</i>      | LIMD1 antisense RNA 1                      | ENSG00000230530 | 0.810  | 1.20E-02 |
| <i>LOC101926943</i>   | uncharacterized LOC101926943               | ENSG00000232729 | 0.428  | 1.20E-02 |
| <i>NANOS3</i>         | nanos C2HC-type zinc finger 3              | ENSG00000187556 | -2.612 | 1.20E-02 |
| <i>NPY1R</i>          | neuropeptide Y receptor Y1                 | ENSG00000164128 | -0.437 | 1.20E-02 |
| <i>PALM2AKAP2</i>     | PALM2 and AKAP2 fusion                     | ENSG00000157654 | -0.766 | 1.20E-02 |
| <i>PCLAF</i>          | PCNA clamp associated factor               | ENSG00000166803 | 0.523  | 1.20E-02 |
| <i>RP11_2B62</i>      |                                            | ENSG00000269929 | -2.612 | 1.20E-02 |
| <i>RP11_315D164</i>   |                                            | ENSG00000260657 | 0.934  | 1.20E-02 |
| <i>RP11_399B171</i>   |                                            | ENSG00000278962 | -1.983 | 1.20E-02 |
| <i>RP11_603J245</i>   |                                            | ENSG00000258317 | 0.432  | 1.20E-02 |
| <i>RP11_63M222</i>    |                                            | ENSG00000260465 | 0.392  | 1.20E-02 |
| <i>RPS26</i>          | ribosomal protein S26                      | ENSG00000197728 | -0.227 | 1.20E-02 |
| <i>SLC37A4</i>        | solute carrier family 37 member 4          | ENSG00000137700 | 0.458  | 1.20E-02 |
| <i>SSSCA1-AS1</i>     | SSSCA1 antisense RNA 1 (head to head)      | ENSG00000260233 | 2.097  | 1.20E-02 |
| <i>TMEM80</i>         | transmembrane protein 80                   | ENSG00000177042 | -0.478 | 1.20E-02 |
| <i>ZFP3</i>           | ZFP3 zinc finger protein                   | ENSG00000180787 | -0.766 | 1.20E-02 |
| <i>ZFPM1</i>          | zinc finger protein, FOG family member 1   | ENSG00000179588 | 0.381  | 1.20E-02 |
| <i>COX4I1</i>         | cytochrome c oxidase subunit 4I1           | ENSG00000131143 | -0.290 | 1.20E-03 |
| <i>TPST2</i>          | tyrosylprotein sulfotransferase 2          | ENSG00000128294 | -0.478 | 1.20E-03 |
| <i>ZC3H8</i>          | zinc finger CCCH-type containing 8         | ENSG00000144161 | -1.069 | 1.20E-03 |
| <i>ADSS1</i>          | adenylosuccinate synthase 1                | ENSG00000185100 | 3.153  | 1.30E-02 |
| <i>GLYR1</i>          | glyoxylate reductase 1 homolog             | ENSG00000140632 | 0.267  | 1.30E-02 |
| <i>KIAA0930</i>       | KIAA0930                                   | ENSG00000100364 | 0.328  | 1.30E-02 |
| <i>METTL25</i>        | methyltransferase like 25                  | ENSG00000127720 | 1.252  | 1.30E-02 |
| <i>MIR181A1HG</i>     | MIR181A1 host gene                         | ENSG00000229989 | -2.073 | 1.30E-02 |
| <i>MPV17</i>          | mitochondrial inner membrane protein MPV17 | ENSG00000115204 | -0.326 | 1.30E-02 |
| <i>PRPF40B</i>        | pre-mRNA processing factor 40 homolog B    | ENSG00000110844 | 0.312  | 1.30E-02 |
| <i>RNF208</i>         | ring finger protein 208                    | ENSG00000212864 | -1.513 | 1.30E-02 |
| <i>RP11-753C18.12</i> |                                            | ENSG00000282772 | 1.023  | 1.30E-02 |
| <i>RP11_120K92</i>    |                                            | ENSG00000259684 | 3.153  | 1.30E-02 |
| <i>RP11_27M241</i>    |                                            | ENSG00000256013 | -0.753 | 1.30E-02 |
| <i>RP11_459E51</i>    |                                            | ENSG00000253125 | -0.904 | 1.30E-02 |
| <i>TUBE1</i>          | tubulin epsilon 1                          | ENSG00000074935 | 0.782  | 1.30E-02 |
| <i>USP12</i>          | ubiquitin specific peptidase 12            | ENSG00000152484 | 0.398  | 1.30E-02 |
| <i>ZBED1</i>          | zinc finger BED-type containing 1          | ENSG00000214717 | -0.277 | 1.30E-02 |
| <i>LIME1</i>          | Lck interacting transmembrane adaptor 1    | ENSG00000203896 | 1.408  | 1.30E-03 |
| <i>AC0936735</i>      |                                            | ENSG00000232533 | -0.655 | 1.40E-02 |
| <i>ARL4A</i>          | ADP ribosylation factor like GTPase 4A     | ENSG00000122644 | -0.324 | 1.40E-02 |
| <i>BRCA2</i>          | BRCA2 DNA repair associated                | ENSG00000139618 | 0.554  | 1.40E-02 |
| <i>GLI4</i>           | GLI family zinc finger 4                   | ENSG00000250571 | 0.547  | 1.40E-02 |
| <i>LINC00511</i>      | long intergenic non-protein coding RNA 511 | ENSG00000227036 | -1.325 | 1.40E-02 |
| <i>MARCHF7</i>        | membrane associated ring-CH-type finger 7  | ENSG00000136536 | 0.258  | 1.40E-02 |
| <i>NKILA</i>          |                                            | ENSG00000278709 | -1.449 | 1.40E-02 |
| <i>OAS3</i>           | 2'-5'-oligoadenylate synthetase 3          | ENSG00000111331 | 0.351  | 1.40E-02 |
| <i>RLF</i>            | rearranged L-myc fusion                    | ENSG00000117000 | 0.431  | 1.40E-02 |
| <i>SLC9A3-AS1</i>     | SLC9A3 antisense RNA 1                     | ENSG00000225138 | 0.286  | 1.40E-02 |
| <i>SMYD5</i>          | SMYD family member 5                       | ENSG00000135632 | 0.427  | 1.40E-02 |
| <i>SUGT1</i>          | SGT1 homolog, MIS12 kinetochore complex    | ENSG00000165416 | -0.296 | 1.40E-02 |

|              |                                                                 |                 |        |          |
|--------------|-----------------------------------------------------------------|-----------------|--------|----------|
|              | assembly cochaperone                                            |                 |        |          |
| ZFP69B       | ZFP69 zinc finger protein B                                     | ENSG00000187801 | 0.892  | 1.40E-02 |
| RNF215       | ring finger protein 215                                         | ENSG00000099999 | -0.641 | 1.40E-03 |
| ZBTB11       | zinc finger and BTB domain containing 11                        | ENSG00000066422 | 0.492  | 1.40E-03 |
| B3GNT7       | UDP-GlcNAc:betaGal beta-1,3-N-acetylglucosaminyltransferase 7   | ENSG00000156966 | -1.511 | 1.50E-02 |
| CIRBP-AS1    | CIRBP antisense RNA 1                                           | ENSG00000267493 | -1.221 | 1.50E-02 |
| DIS3L2       | DIS3 like 3'-5' exoribonuclease 2                               | ENSG00000144535 | 0.426  | 1.50E-02 |
| EEPD1        | endonuclease/exonuclease/phosphatase family domain containing 1 | ENSG00000122547 | 1.270  | 1.50E-02 |
| GALM         | galactose mutarotase                                            | ENSG00000143891 | -0.543 | 1.50E-02 |
| MAPT         | microtubule associated protein tau                              | ENSG00000186868 | -1.221 | 1.50E-02 |
| NAA20        | N(alpha)-acetyltransferase 20, NatB catalytic subunit           | ENSG00000173418 | -0.318 | 1.50E-02 |
| PIGP         | phosphatidylinositol glycan anchor biosynthesis class P         | ENSG00000185808 | 0.791  | 1.50E-02 |
| PPP4R3B      | protein phosphatase 4 regulatory subunit 3B                     | ENSG00000275052 | 0.289  | 1.50E-02 |
| PSMF1        | proteasome inhibitor subunit 1                                  | ENSG00000125818 | 0.274  | 1.50E-02 |
| RADX         | RPA1 related single stranded DNA binding protein, X-linked      | ENSG00000147231 | 1.165  | 1.50E-02 |
| RP11_1055B84 |                                                                 | ENSG00000262877 | -0.833 | 1.50E-02 |
| STX4         | syntaxin 4                                                      | ENSG00000103496 | -0.297 | 1.50E-02 |
| SYDE1        | synapse defective Rho GTPase homolog 1                          | ENSG00000105137 | 0.260  | 1.50E-02 |
| TMEM116      | transmembrane protein 116                                       | ENSG00000198270 | 0.927  | 1.50E-02 |
| UTP15        | UTP15 small subunit processome component                        | ENSG00000164338 | -0.493 | 1.50E-02 |
| SUSD6        | sushi domain containing 6                                       | ENSG00000100647 | -0.497 | 1.50E-03 |
| SLX4IP       | SLX4 interacting protein                                        | ENSG00000149346 | 1.258  | 1.50E-04 |
| ALDH3B1      | aldehyde dehydrogenase 3 family member B1                       | ENSG00000006534 | 0.336  | 1.60E-02 |
| APBA1        | amyloid beta precursor protein binding family A member 1        | ENSG00000107282 | 0.812  | 1.60E-02 |
| APOBEC3G     | apolipoprotein B mRNA editing enzyme catalytic subunit 3G       | ENSG00000239713 | -0.883 | 1.60E-02 |
| APOL1        | apolipoprotein L1                                               | ENSG00000100342 | -0.417 | 1.60E-02 |
| B4GAT1       | beta-1,4-glucuronyltransferase 1                                | ENSG00000174684 | 0.318  | 1.60E-02 |
| JCAD         | junctional cadherin 5 associated                                | ENSG00000165757 | 0.231  | 1.60E-02 |
| KLHDC8B      | kelch domain containing 8B                                      | ENSG00000185909 | 0.496  | 1.60E-02 |
| RRP1         | ribosomal RNA processing 1                                      | ENSG00000160214 | -0.344 | 1.60E-02 |
| TMEM79       | transmembrane protein 79                                        | ENSG00000163472 | 0.424  | 1.60E-02 |
| TPK1         | thiamin pyrophosphokinase 1                                     | ENSG00000196511 | -0.773 | 1.60E-02 |
| TTI2         | TELO2 interacting protein 2                                     | ENSG00000129696 | -0.432 | 1.60E-02 |
| ZNF691       | zinc finger protein 691                                         | ENSG00000164011 | -0.789 | 1.60E-02 |
| ST7L         | suppression of tumorigenicity 7 like                            | ENSG00000007341 | -0.649 | 1.60E-03 |
| MT-ATP6      | ATP synthase F0 subunit 6                                       | ENSG00000198899 | -0.292 | 1.60E-04 |
| ACAD8        | acyl-CoA dehydrogenase family member 8                          | ENSG00000151498 | 0.415  | 1.70E-02 |
| AP00306812   |                                                                 | ENSG00000255173 | -0.561 | 1.70E-02 |
| ARMC1        | armadillo repeat containing 1                                   | ENSG00000104442 | -0.330 | 1.70E-02 |
| BAIAP2-DT    | BAIAP2 divergent transcript                                     | ENSG00000226137 | -0.330 | 1.70E-02 |
| CHL1         | cell adhesion molecule L1 like                                  | ENSG00000134121 | 0.415  | 1.70E-02 |
| COG2         | component of oligomeric golgi complex 2                         | ENSG00000135775 | -0.543 | 1.70E-02 |
| CTB_12A173   |                                                                 | ENSG00000269292 | -0.308 | 1.70E-02 |

|                               |                                                                       |                 |        |          |
|-------------------------------|-----------------------------------------------------------------------|-----------------|--------|----------|
| <i>FARSA</i>                  | phenylalanyl-tRNA synthetase subunit alpha                            | ENSG00000179115 | -0.254 | 1.70E-02 |
| <i>FLCN</i>                   | folliculin                                                            | ENSG00000154803 | -0.361 | 1.70E-02 |
| <i>GIT1</i>                   | GIT ArfGAP 1                                                          | ENSG00000108262 | -0.272 | 1.70E-02 |
| <i>LINC01852</i>              |                                                                       | ENSG00000236914 | -1.441 | 1.70E-02 |
| <i>MANEA</i>                  | mannosidase endo-alpha                                                | ENSG00000172469 | 0.580  | 1.70E-02 |
| <i>PLA2G4A</i>                | phospholipase A2 group IVA                                            | ENSG00000116711 | 0.540  | 1.70E-02 |
| <i>RP11_264B174</i>           |                                                                       | ENSG00000260367 | 0.540  | 1.70E-02 |
| <i>RPS27</i>                  | ribosomal protein S27                                                 | ENSG00000177954 | -0.204 | 1.70E-02 |
| <i>SNX18</i>                  | sorting nexin 18                                                      | ENSG00000178996 | 0.218  | 1.70E-02 |
| <i>SYNPO2</i>                 | synaptopodin 2                                                        | ENSG00000172403 | 0.231  | 1.70E-02 |
| <i>TCTN2</i>                  | tectonic family member 2                                              | ENSG00000168778 | -0.503 | 1.70E-02 |
| <i>ITPKB</i>                  | inositol-trisphosphate 3-kinase B                                     | ENSG00000143772 | 0.591  | 1.70E-03 |
| <i>ZNF843</i>                 | zinc finger protein 843                                               | ENSG00000176723 | -2.005 | 1.70E-03 |
| <i>ACSS1</i>                  | acyl-CoA synthetase short chain family member 1                       | ENSG00000154930 | 1.318  | 1.80E-02 |
| <i>ALG1L9P</i>                | ALG1 like 9, pseudogene                                               | ENSG00000248671 | -1.608 | 1.80E-02 |
| <i>BHLHE40</i>                | basic helix-loop-helix family member e40                              | ENSG00000134107 | -0.245 | 1.80E-02 |
| <i>FAM222A</i>                | family with sequence similarity 222 member A                          | ENSG00000139438 | 1.214  | 1.80E-02 |
| <i>FANCB</i>                  | FA complementation group B                                            | ENSG00000181544 | 0.948  | 1.80E-02 |
| <i>FNBP1</i>                  | formin binding protein 1                                              | ENSG00000187239 | -0.286 | 1.80E-02 |
| <i>GPN2</i>                   | GPN-loop GTPase 2                                                     | ENSG00000142751 | -0.383 | 1.80E-02 |
| <i>KCNAB3</i>                 | potassium voltage-gated channel subfamily A regulatory beta subunit 3 | ENSG00000170049 | 1.318  | 1.80E-02 |
| <i>KCNIP2</i>                 | potassium voltage-gated channel interacting protein 2                 | ENSG00000120049 | 1.318  | 1.80E-02 |
| <i>KCNK3</i>                  | potassium two pore domain channel subfamily K member 3                | ENSG00000171303 | 0.410  | 1.80E-02 |
| <i>KIF15</i>                  | kinesin family member 15                                              | ENSG00000163808 | 0.428  | 1.80E-02 |
| <i>NEIL3</i>                  | nei like DNA glycosylase 3                                            | ENSG00000109674 | 0.716  | 1.80E-02 |
| <i>OTUB1</i>                  | OTU deubiquitinase, ubiquitin aldehyde binding 1                      | ENSG00000167770 | 0.244  | 1.80E-02 |
| <i>RP11_229E134</i>           |                                                                       | ENSG00000274630 | 0.428  | 1.80E-02 |
| <i>RP11_490E152</i>           |                                                                       | ENSG00000233021 | 1.214  | 1.80E-02 |
| <i>SPEF2</i>                  | sperm flagellar 2                                                     | ENSG00000152582 | 1.768  | 1.80E-02 |
| <i>STAG3L5P-PVRIG2P-PILRB</i> |                                                                       | ENSG00000272752 | -1.608 | 1.80E-02 |
| <i>TBRG1</i>                  | transforming growth factor beta regulator 1                           | ENSG00000154144 | -0.331 | 1.80E-02 |
| <i>TRIM66</i>                 | tripartite motif containing 66                                        | ENSG00000166436 | -0.561 | 1.80E-02 |
| <i>GLYCK</i>                  | glycerate kinase                                                      | ENSG00000168237 | -1.028 | 1.80E-03 |
| <i>CPS1</i>                   | carbamoyl-phosphate synthase 1                                        | ENSG00000021826 | 0.382  | 1.90E-02 |
| <i>IFITM1</i>                 | interferon induced transmembrane protein 1                            | ENSG00000185885 | -0.645 | 1.90E-02 |
| <i>MAPK11</i>                 | mitogen-activated protein kinase 11                                   | ENSG00000185386 | 0.823  | 1.90E-02 |
| <i>MIR1915HG</i>              | MIR1915 host gene                                                     | ENSG00000204682 | -0.731 | 1.90E-02 |
| <i>NDUFC1</i>                 | NADH:ubiquinone oxidoreductase subunit C1                             | ENSG00000109390 | -0.416 | 1.90E-02 |
| <i>PIGBOS1</i>                | PIGB opposite strand 1                                                | ENSG00000225973 | -0.731 | 1.90E-02 |
| <i>PLA2G15</i>                | phospholipase A2 group XV                                             | ENSG00000103066 | 0.401  | 1.90E-02 |
| <i>PPP4R3A</i>                | protein phosphatase 4 regulatory subunit 3A                           | ENSG00000100796 | 0.278  | 1.90E-02 |
| <i>SLC35F5</i>                | solute carrier family 35 member F5                                    | ENSG00000115084 | 0.333  | 1.90E-02 |

|              |                                                           |                 |        |          |
|--------------|-----------------------------------------------------------|-----------------|--------|----------|
| TEAD2        | TEA domain transcription factor 2                         | ENSG00000074219 | -0.645 | 1.90E-02 |
| TMEM60       | transmembrane protein 60                                  | ENSG00000135211 | -0.731 | 1.90E-02 |
| VGLL4        | vestigial like family member 4                            | ENSG00000144560 | -0.225 | 1.90E-02 |
| ZNFX1        | zinc finger NFX1-type containing 1                        | ENSG00000124201 | 0.258  | 1.90E-02 |
| PSMD12       | proteasome 26S subunit, non-ATPase 12                     | ENSG00000197170 | 0.404  | 1.90E-03 |
| SLC25A32     | solute carrier family 25 member 32                        | ENSG00000164933 | 0.569  | 1.90E-03 |
| AP0016105    |                                                           | ENSG00000228318 | 2.020  | 2.00E-02 |
| C3           | complement C3                                             | ENSG00000125730 | -1.431 | 2.00E-02 |
| COA8         | cytochrome c oxidase assembly factor 8                    | ENSG00000256053 | 0.471  | 2.00E-02 |
| DLX5         | distal-less homeobox 5                                    | ENSG00000105880 | -1.030 | 2.00E-02 |
| DSTNP2       | DSTN pseudogene 2                                         | ENSG00000248593 | 1.653  | 2.00E-02 |
| DUSP4        | dual specificity phosphatase 4                            | ENSG00000120875 | -0.219 | 2.00E-02 |
| EZH1         | enhancer of zeste 1 polycomb repressive complex 2 subunit | ENSG00000108799 | 0.414  | 2.00E-02 |
| G3BP1        | G3BP stress granule assembly factor 1                     | ENSG00000145907 | 0.218  | 2.00E-02 |
| INE1         | inactivation escape 1                                     | ENSG00000224975 | 1.653  | 2.00E-02 |
| KAT8         | lysine acetyltransferase 8                                | ENSG00000103510 | -0.339 | 2.00E-02 |
| MBTD1        | mbt domain containing 1                                   | ENSG00000011258 | -0.456 | 2.00E-02 |
| ORC6         | origin recognition complex subunit 6                      | ENSG00000091651 | -0.417 | 2.00E-02 |
| PTPN4        | protein tyrosine phosphatase non-receptor type 4          | ENSG00000088179 | 0.471  | 2.00E-02 |
| RP11_860B131 |                                                           | ENSG00000256747 | 0.588  | 2.00E-02 |
| RP11_867G234 |                                                           | ENSG00000254452 | -0.280 | 2.00E-02 |
| SELENOM      | selenoprotein M                                           | ENSG00000198832 | 0.399  | 2.00E-02 |
| SIVA1        | SIVA1 apoptosis inducing factor                           | ENSG00000184990 | 0.318  | 2.00E-02 |
| SLC35A5      | solute carrier family 35 member A5                        | ENSG00000138459 | 0.308  | 2.00E-02 |
| ST3GAL4      | ST3 beta-galactoside alpha-2,3-sialyltransferase 4        | ENSG00000110080 | -0.293 | 2.00E-02 |
| TOR2A        | torsin family 2 member A                                  | ENSG00000160404 | 0.709  | 2.00E-02 |
| AC0056143    |                                                           | ENSG00000269296 | 6.362  | 2.00E-03 |
| PIGH         | phosphatidylinositol glycan anchor biosynthesis class H   | ENSG00000100564 | 0.840  | 2.00E-03 |
| RP11_400K93  |                                                           | ENSG00000254204 | 6.238  | 2.00E-03 |
| RP11_507J182 |                                                           | ENSG00000259773 | -1.090 | 2.00E-04 |
| ARFGEF3      | ARFGEF family member 3                                    | ENSG00000112379 | -0.925 | 2.10E-02 |
| ATP6V0E1     | ATPase H <sup>+</sup> transporting V0 subunit e1          | ENSG00000113732 | -0.234 | 2.10E-02 |
| CBX8         | chromobox 8                                               | ENSG00000141570 | -0.641 | 2.10E-02 |
| CORO2A       | coronin 2A                                                | ENSG00000106789 | 0.990  | 2.10E-02 |
| DHFR2        | dihydrofolate reductase 2                                 | ENSG00000178700 | -0.782 | 2.10E-02 |
| HLX-AS1      | HLX antisense RNA 1                                       | ENSG00000257551 | -1.255 | 2.10E-02 |
| IGFBP1       | insulin like growth factor binding protein 1              | ENSG00000146678 | -0.782 | 2.10E-02 |
| ILVBL        | ilvB acetolactate synthase like                           | ENSG00000105135 | -0.317 | 2.10E-02 |
| KCTD7        | potassium channel tetramerization domain containing 7     | ENSG00000243335 | -0.612 | 2.10E-02 |
| KRT81        | keratin 81                                                | ENSG00000205426 | -0.848 | 2.10E-02 |
| LOC440434    | aminopeptidase puromycin sensitive pseudogene             | ENSG00000274487 | -1.379 | 2.10E-02 |
| NDUFA6       | NADH:ubiquinone oxidoreductase subunit A6                 | ENSG00000184983 | -0.359 | 2.10E-02 |
| PIGW         | phosphatidylinositol glycan anchor biosynthesis class W   | ENSG00000277161 | 0.568  | 2.10E-02 |
| POLR1E       | RNA polymerase I subunit E                                | ENSG00000137054 | -0.414 | 2.10E-02 |
| PRPF38A      | pre-mRNA processing factor 38A                            | ENSG00000134748 | -0.330 | 2.10E-02 |

|                      |                                                      |                 |        |          |
|----------------------|------------------------------------------------------|-----------------|--------|----------|
| <i>RCN1P2</i>        | reticulocalbin 1 pseudogene 2                        | ENSG00000214455 | -0.513 | 2.10E-02 |
| <i>RP11_527N222</i>  |                                                      | ENSG00000253746 | 0.857  | 2.10E-02 |
| <i>S100A6</i>        | S100 calcium binding protein A6                      | ENSG00000197956 | -0.181 | 2.10E-02 |
| <i>SACM1L</i>        | SAC1 like phosphatidylinositide phosphatase          | ENSG00000211456 | -0.332 | 2.10E-02 |
| <i>THOC3</i>         | THO complex 3                                        | ENSG00000051596 | -0.403 | 2.10E-02 |
| <i>UBASH3B</i>       | ubiquitin associated and SH3 domain containing B     | ENSG00000154127 | 0.405  | 2.10E-02 |
| <i>XRCC1</i>         | X-ray repair cross complementing 1                   | ENSG00000073050 | -0.296 | 2.10E-02 |
| <i>ZNF506</i>        | zinc finger protein 506                              | ENSG00000081665 | -0.697 | 2.10E-02 |
| <i>APOOL</i>         | apolipoprotein O like                                | ENSG00000155008 | 0.480  | 2.20E-02 |
| <i>C3orf52</i>       | chromosome 3 open reading frame 52                   | ENSG00000114529 | 1.199  | 2.20E-02 |
| <i>C8G</i>           | complement C8 gamma chain                            | ENSG00000176919 | -2.444 | 2.20E-02 |
| <i>CDKN1C</i>        | cyclin dependent kinase inhibitor 1C                 | ENSG00000129757 | -2.444 | 2.20E-02 |
| <i>CTD_2026D202</i>  |                                                      | ENSG00000253347 | -2.444 | 2.20E-02 |
| <i>GMPR</i>          | guanosine monophosphate reductase                    | ENSG00000137198 | -0.513 | 2.20E-02 |
| <i>GRTP1</i>         | growth hormone regulated TBC protein 1               | ENSG00000139835 | -1.949 | 2.20E-02 |
| <i>GS1_293C51</i>    |                                                      | ENSG00000273138 | -0.586 | 2.20E-02 |
| <i>HASPIN</i>        | histone H3 associated protein kinase                 | ENSG00000177602 | 0.554  | 2.20E-02 |
| <i>ITGB7</i>         | integrin subunit beta 7                              | ENSG00000139626 | 2.674  | 2.20E-02 |
| <i>KCNB1</i>         | potassium voltage-gated channel subfamily B member 1 | ENSG00000158445 | 2.674  | 2.20E-02 |
| <i>LINC02298</i>     | long intergenic non-protein coding RNA 2298          | ENSG00000257556 | 2.674  | 2.20E-02 |
| <i>LOC105375787</i>  | uncharacterized LOC105375787                         | ENSG00000254019 | 2.674  | 2.20E-02 |
| <i>NIPAL1</i>        | NIPA like domain containing 1                        | ENSG00000163293 | -1.018 | 2.20E-02 |
| <i>PCF11</i>         | PCF11 cleavage and polyadenylation factor subunit    | ENSG00000165494 | -0.340 | 2.20E-02 |
| <i>RIN1</i>          | Ras and Rab interactor 1                             | ENSG00000174791 | -0.376 | 2.20E-02 |
| <i>RNF227</i>        | ring finger protein 227                              | ENSG00000179859 | -1.172 | 2.20E-02 |
| <i>RP11_263K196</i>  |                                                      | ENSG00000236263 | -2.444 | 2.20E-02 |
| <i>RP11_344N105</i>  |                                                      | ENSG00000272630 | 2.674  | 2.20E-02 |
| <i>RP11_432J222</i>  |                                                      | ENSG00000238058 | 2.674  | 2.20E-02 |
| <i>RP11_467L137</i>  |                                                      | ENSG00000276900 | -2.444 | 2.20E-02 |
| <i>RP11_531A245</i>  |                                                      | ENSG00000253636 | -2.444 | 2.20E-02 |
| <i>RP11_689P113</i>  |                                                      | ENSG00000251186 | 2.674  | 2.20E-02 |
| <i>RPL10AP6</i>      | ribosomal protein L10a pseudogene 6                  | ENSG00000226360 | -1.949 | 2.20E-02 |
| <i>SEPTIN9-DT</i>    |                                                      | ENSG00000263718 | 2.674  | 2.20E-02 |
| <i>SLC22A20P</i>     | solute carrier family 22 member 20, pseudogene       | ENSG00000197847 | 2.674  | 2.20E-02 |
| <i>SSBP3-AS1</i>     | SSBP3 antisense RNA 1                                | ENSG00000198711 | -2.444 | 2.20E-02 |
| <i>TIGD3</i>         | tigger transposable element derived 3                | ENSG00000173825 | 2.674  | 2.20E-02 |
| <i>WI2-87327B8.2</i> |                                                      | ENSG00000273812 | -2.444 | 2.20E-02 |
| <i>ZWINT</i>         | ZW10 interacting kinetochore protein                 | ENSG00000122952 | -0.252 | 2.20E-02 |
| <i>C22orf46</i>      | CTA-216E10.6                                         | ENSG00000184208 | -0.556 | 2.20E-03 |
| <i>CDC14A</i>        | cell division cycle 14A                              | ENSG00000079335 | 1.433  | 2.20E-03 |
| <i>GPAT3</i>         | glycerol-3-phosphate acyltransferase 3               | ENSG00000138678 | -1.519 | 2.20E-03 |
| <i>TRIM52-AS1</i>    | TRIM52 antisense RNA 1 (head to head)                | ENSG00000248275 | -1.080 | 2.20E-03 |
| <i>USP36</i>         | ubiquitin specific peptidase 36                      | ENSG00000055483 | -0.395 | 2.20E-03 |
| <i>ZFYVE27</i>       | zinc finger FYVE-type containing 27                  | ENSG00000155256 | -0.441 | 2.20E-03 |
| <i>ZNF185</i>        | zinc finger protein 185 with LIM domain              | ENSG00000147394 | -1.080 | 2.20E-03 |
| <i>PDHA1</i>         | pyruvate dehydrogenase E1 alpha 1 subunit            | ENSG00000131828 | -0.461 | 2.20E-04 |

|                     |                                                            |                 |        |          |
|---------------------|------------------------------------------------------------|-----------------|--------|----------|
| <i>AC0107619</i>    |                                                            | ENSG00000265474 | -0.839 | 2.30E-02 |
| <i>ADPRHL2</i>      | ADP-ribosylhydrolase like 2                                | ENSG00000116863 | -0.324 | 2.30E-02 |
| <i>APOA1</i>        | apolipoprotein A1                                          | ENSG00000118137 | -2.211 | 2.30E-02 |
| <i>ATP5CKMT</i>     | ATP synthase c subunit lysine N-methyltransferase          | ENSG00000150756 | 0.590  | 2.30E-02 |
| <i>FAM118A</i>      | family with sequence similarity 118 member A               | ENSG00000100376 | 0.538  | 2.30E-02 |
| <i>FOXRED1</i>      | FAD dependent oxidoreductase domain containing 1           | ENSG00000110074 | -0.378 | 2.30E-02 |
| <i>LARP6</i>        | La ribonucleoprotein domain family member 6                | ENSG00000166173 | -0.270 | 2.30E-02 |
| <i>LIPT2</i>        | lipoyl(octanoyl) transferase 2                             | ENSG00000175536 | -0.912 | 2.30E-02 |
| <i>LOC102724684</i> | uncharacterized LOC102724684                               | ENSG00000267026 | -2.211 | 2.30E-02 |
| <i>MT-ND1</i>       | NADH dehydrogenase, subunit 1 (complex I)                  | ENSG00000198888 | -0.187 | 2.30E-02 |
| <i>MTHFR</i>        | methylenetetrahydrofolate reductase                        | ENSG00000177000 | 0.397  | 2.30E-02 |
| <i>NCEH1</i>        | neutral cholesterol ester hydrolase 1                      | ENSG00000144959 | -0.357 | 2.30E-02 |
| <i>OBI1</i>         | ORC ubiquitin ligase 1                                     | ENSG00000152193 | 0.538  | 2.30E-02 |
| <i>POPDC3</i>       | popeye domain containing 3                                 | ENSG00000132429 | -1.009 | 2.30E-02 |
| <i>RPGR</i>         | retinitis pigmentosa GTPase regulator                      | ENSG00000156313 | -0.397 | 2.30E-02 |
| <i>TMEM68</i>       | transmembrane protein 68                                   | ENSG00000167904 | -0.564 | 2.30E-02 |
| <i>WASHC5-AS1</i>   |                                                            | ENSG00000253167 | -0.776 | 2.30E-02 |
| <i>SLC44A3-AS1</i>  | SLC44A3 antisense RNA 1                                    | ENSG00000224081 | 1.237  | 2.30E-03 |
| <i>ZNF528-AS1</i>   | ZNF528 antisense RNA 1                                     | ENSG00000269834 | 1.212  | 2.30E-03 |
| <i>ABHD10</i>       | abhydrolase domain containing 10                           | ENSG00000144827 | -0.410 | 2.40E-02 |
| <i>B4GALT7</i>      | beta-1,4-galactosyltransferase 7                           | ENSG00000027847 | 0.367  | 2.40E-02 |
| <i>CINP</i>         | cyclin dependent kinase 2 interacting protein              | ENSG00000100865 | 0.374  | 2.40E-02 |
| <i>DANCR</i>        | differentiation antagonizing non-protein coding RNA        | ENSG00000226950 | -0.352 | 2.40E-02 |
| <i>DYNC1LI2</i>     | dynein cytoplasmic 1 light intermediate chain 2            | ENSG00000135720 | -0.216 | 2.40E-02 |
| <i>LINC00863</i>    | long intergenic non-protein coding RNA 863                 | ENSG00000224914 | -0.564 | 2.40E-02 |
| <i>PDLIM4</i>       | PDZ and LIM domain 4                                       | ENSG00000131435 | -0.406 | 2.40E-02 |
| <i>RCBTB2</i>       | RCC1 and BTB domain containing protein 2                   | ENSG00000136161 | 0.575  | 2.40E-02 |
| <i>RING1</i>        | ring finger protein 1                                      | ENSG00000204227 | -0.261 | 2.40E-02 |
| <i>TACC2</i>        | transforming acidic coiled-coil containing protein 2       | ENSG00000138162 | -0.382 | 2.40E-02 |
| <i>ZNF180</i>       | zinc finger protein 180                                    | ENSG00000167384 | -0.588 | 2.40E-02 |
| <i>AC0926875</i>    |                                                            | ENSG00000234818 | 0.999  | 2.40E-03 |
| <i>L340794</i>      |                                                            | ENSG00000269583 | 1.053  | 2.40E-03 |
| <i>ANKS3</i>        | ankyrin repeat and sterile alpha motif domain containing 3 | ENSG00000168096 | 0.401  | 2.50E-02 |
| <i>ATG16L1</i>      | autophagy related 16 like 1                                | ENSG00000085978 | -0.395 | 2.50E-02 |
| <i>BDKRB2</i>       | bradykinin receptor B2                                     | ENSG00000168398 | -1.364 | 2.50E-02 |
| <i>CAMK2D</i>       | calcium/calmodulin dependent protein kinase II delta       | ENSG00000145349 | 0.378  | 2.50E-02 |
| <i>CARNS1</i>       | carosine synthase 1                                        | ENSG00000172508 | 0.874  | 2.50E-02 |
| <i>CEP295NL</i>     | CEP295 N-terminal like                                     | ENSG00000178404 | 1.514  | 2.50E-02 |
| <i>COQ5</i>         | coenzyme Q5, methyltransferase                             | ENSG00000110871 | -0.343 | 2.50E-02 |
| <i>EIF5B</i>        | eukaryotic translation initiation factor 5B                | ENSG00000158417 | -0.231 | 2.50E-02 |
| <i>FIS1</i>         | fission, mitochondrial 1                                   | ENSG00000214253 | -0.305 | 2.50E-02 |

|                                |                                                                  |                 |        |          |
|--------------------------------|------------------------------------------------------------------|-----------------|--------|----------|
| <i>GABBR2</i>                  | gamma-aminobutyric acid type B receptor subunit 2                | ENSG00000136928 | -0.819 | 2.50E-02 |
| <i>GFER</i>                    | growth factor, augments liver regeneration                       | ENSG00000127554 | -0.329 | 2.50E-02 |
| <i>LOC101929240</i>            | U5 small nuclear ribonucleoprotein 200 kDa helicase pseudogene   | ENSG00000265298 | 1.019  | 2.50E-02 |
| <i>LOC339803</i>               | uncharacterized LOC339803                                        | ENSG00000212978 | 0.640  | 2.50E-02 |
| <i>MLST8</i>                   | MTOR associated protein, LST8 homolog                            | ENSG00000167965 | -0.302 | 2.50E-02 |
| <i>MRPS31</i>                  | mitochondrial ribosomal protein S31                              | ENSG00000102738 | -0.512 | 2.50E-02 |
| <i>NAGLU</i>                   | N-acetyl-alpha-glucosaminidase                                   | ENSG00000108784 | 0.248  | 2.50E-02 |
| <i>PHLDB2</i>                  | pleckstrin homology like domain family B member 2                | ENSG00000144824 | 0.362  | 2.50E-02 |
| <i>RP11_338I211</i>            |                                                                  | ENSG00000271933 | -0.395 | 2.50E-02 |
| <i>C8orf44-SGK3/SGK3</i>       | serum/glucocorticoid regulated kinase family member 3            | ENSG00000104205 | 1.588  | 2.50E-03 |
| <i>EMILIN2</i>                 | elastin microfibril interfacer 2                                 | ENSG00000132205 | -0.828 | 2.50E-03 |
| <i>NOL3</i>                    | nucleolar protein 3                                              | ENSG00000140939 | -0.582 | 2.50E-03 |
| <i>ZNF23</i>                   | zinc finger protein 23                                           | ENSG00000167377 | 1.588  | 2.50E-03 |
| <i>ZSWIM5</i>                  | zinc finger SWIM-type containing 5                               | ENSG00000162415 | 0.379  | 2.50E-03 |
| <i>PSMC3IP</i>                 | PSMC3 interacting protein                                        | ENSG00000131470 | 0.685  | 2.50E-04 |
| <i>AC0073087</i>               |                                                                  | ENSG00000272600 | 1.268  | 2.60E-02 |
| <i>AC0374451</i>               |                                                                  | ENSG00000233635 | 1.268  | 2.60E-02 |
| <i>ACVR1C</i>                  | activin A receptor type 1C                                       | ENSG00000123612 | 0.686  | 2.60E-02 |
| <i>APOE</i>                    | apolipoprotein E                                                 | ENSG00000130203 | -0.592 | 2.60E-02 |
| <i>CALM1 (includes others)</i> | calmodulin 1                                                     | ENSG00000160014 | -0.193 | 2.60E-02 |
| <i>DIPK1A</i>                  | divergent protein kinase domain 1A                               | ENSG00000154511 | 0.471  | 2.60E-02 |
| <i>FBXO31</i>                  | F-box protein 31                                                 | ENSG00000103264 | 0.349  | 2.60E-02 |
| <i>H3-3A/H3-3B</i>             | H3.3 histone A                                                   | ENSG00000163041 | 0.253  | 2.60E-02 |
| <i>LENG9</i>                   | leukocyte receptor cluster member 9                              | ENSG00000275183 | 0.620  | 2.60E-02 |
| <i>PKD2L2</i>                  | polycystin 2 like 2, transient receptor potential cation channel | ENSG00000078795 | 0.686  | 2.60E-02 |
| <i>RBM6</i>                    | RNA binding motif protein 6                                      | ENSG00000004534 | -0.250 | 2.60E-02 |
| <i>RBX1</i>                    | ring-box 1                                                       | ENSG00000100387 | -0.322 | 2.60E-02 |
| <i>RHBDL1</i>                  | rhomboid like 1                                                  | ENSG00000103269 | -0.687 | 2.60E-02 |
| <i>RNA5SP216</i>               | RNA, 5S ribosomal pseudogene 216                                 | ENSG00000251920 | -1.211 | 2.60E-02 |
| <i>RP2</i>                     | RP2 activator of ARL3 GTPase                                     | ENSG00000102218 | 0.433  | 2.60E-02 |
| <i>RPS29</i>                   | ribosomal protein S29                                            | ENSG00000213741 | -0.215 | 2.60E-02 |
| <i>RPS8</i>                    | ribosomal protein S8                                             | ENSG00000142937 | -0.173 | 2.60E-02 |
| <i>TSNARE1</i>                 | t-SNARE domain containing 1                                      | ENSG00000171045 | -0.619 | 2.60E-02 |
| <i>ZNF81</i>                   | zinc finger protein 81                                           | ENSG00000197779 | 0.686  | 2.60E-02 |
| <i>ZSCAN30</i>                 | zinc finger and SCAN domain containing 30                        | ENSG00000186814 | 0.447  | 2.60E-02 |
| <i>MT-RNR1</i>                 | s-rRNA                                                           | ENSG00000211459 | -0.285 | 2.60E-04 |
| <i>CASTOR2</i>                 | cytosolic arginine sensor for mTORC1 subunit 2                   | ENSG00000274070 | -0.881 | 2.70E-02 |
| <i>CCDC71L</i>                 | coiled-coil domain containing 71 like                            | ENSG00000253276 | 0.387  | 2.70E-02 |
| <i>EBAG9</i>                   | estrogen receptor binding site associated antigen 9              | ENSG00000147654 | 0.652  | 2.70E-02 |
| <i>GTF2IRD1</i>                | GTF2I repeat domain containing 1                                 | ENSG00000006704 | -0.375 | 2.70E-02 |
| <i>HIP1</i>                    | huntingtin interacting protein 1                                 | ENSG00000127946 | -0.251 | 2.70E-02 |
| <i>INSIG2</i>                  | insulin induced gene 2                                           | ENSG00000125629 | 0.471  | 2.70E-02 |
| <i>MSRB2</i>                   | methionine sulfoxide reductase B2                                | ENSG00000148450 | -0.397 | 2.70E-02 |
| <i>MZT2B</i>                   | mitotic spindle organizing protein 2B                            | ENSG00000152082 | -0.204 | 2.70E-02 |



|                        |                                                             |                 |        |          |
|------------------------|-------------------------------------------------------------|-----------------|--------|----------|
| <i>PATZ1</i>           | POZ/BTB and AT hook containing zinc finger 1                | ENSG00000100105 | 0.389  | 2.70E-02 |
| <i>RAPGEFL1</i>        | Rap guanine nucleotide exchange factor like 1               | ENSG00000108352 | -0.764 | 2.70E-02 |
| <i>RP11-352M15.2</i>   |                                                             | ENSG00000273015 | -0.591 | 2.70E-02 |
| <i>RP11_56G102</i>     |                                                             | ENSG00000257386 | -0.425 | 2.70E-02 |
| <i>RP13_131K191</i>    |                                                             | ENSG00000235236 | -0.591 | 2.70E-02 |
| <i>SLC25A17</i>        | solute carrier family 25 member 17                          | ENSG00000100372 | 0.586  | 2.70E-02 |
| <i>TAB3</i>            | TGF-beta activated kinase 1 (MAP3K7) binding protein 3      | ENSG00000157625 | 0.387  | 2.70E-02 |
| <i>TTC26</i>           | tetratricopeptide repeat domain 26                          | ENSG00000105948 | -0.591 | 2.70E-02 |
| <i>ASB3/GPR75-ASB3</i> | ankyrin repeat and SOCS box containing 3                    | ENSG00000115239 | 1.259  | 2.70E-03 |
| <i>EFNB3</i>           | ephrin B3                                                   | ENSG00000108947 | -0.678 | 2.70E-03 |
| <i>KANK3</i>           | KN motif and ankyrin repeat domains 3                       | ENSG00000186994 | -2.393 | 2.70E-03 |
| <i>RP11_1277A32</i>    |                                                             | ENSG00000246596 | 2.029  | 2.70E-03 |
| <i>ST20-MTHFS</i>      | ST20-MTHFS readthrough                                      | ENSG00000259332 | 2.087  | 2.70E-03 |
| <i>THAP5</i>           | THAP domain containing 5                                    | ENSG00000177683 | 0.703  | 2.70E-03 |
| <i>ZNF780A</i>         | zinc finger protein 780A                                    | ENSG00000197782 | 0.774  | 2.70E-03 |
| <i>AAGAB</i>           | alpha and gamma adaptin binding protein                     | ENSG00000103591 | 0.310  | 2.80E-02 |
| <i>CCN1</i>            | cellular communication network factor 1                     | ENSG00000142871 | 0.181  | 2.80E-02 |
| <i>CTD_2263F211</i>    |                                                             | ENSG00000251257 | 1.694  | 2.80E-02 |
| <i>CTPS1</i>           | CTP synthase 1                                              | ENSG00000171793 | -0.292 | 2.80E-02 |
| <i>DDX54</i>           | DEAD-box helicase 54                                        | ENSG00000123064 | 0.232  | 2.80E-02 |
| <i>DUSP1</i>           | dual specificity phosphatase 1                              | ENSG00000120129 | 0.223  | 2.80E-02 |
| <i>ELP1</i>            | elongator complex protein 1                                 | ENSG00000070061 | 0.275  | 2.80E-02 |
| <i>ERBB2</i>           | erb-b2 receptor tyrosine kinase 2                           | ENSG00000141736 | 0.229  | 2.80E-02 |
| <i>ERICH3</i>          | glutamate rich 3                                            | ENSG00000178965 | -1.509 | 2.80E-02 |
| <i>GAR1</i>            | GAR1 ribonucleoprotein                                      | ENSG00000109534 | -0.439 | 2.80E-02 |
| <i>HS2ST1</i>          | heparan sulfate 2-O-sulfotransferase 1                      | ENSG00000153936 | 0.269  | 2.80E-02 |
| <i>MBNL3</i>           | muscleblind like splicing regulator 3                       | ENSG00000076770 | 0.558  | 2.80E-02 |
| <i>MME</i>             | membrane metalloendopeptidase                               | ENSG00000196549 | -0.308 | 2.80E-02 |
| <i>NNMT</i>            | nicotinamide N-methyltransferase                            | ENSG00000166741 | -0.402 | 2.80E-02 |
| <i>NTAN1</i>           | N-terminal asparagine amidase                               | ENSG00000157045 | -0.294 | 2.80E-02 |
| <i>PARL</i>            | presenilin associated rhomboid like                         | ENSG00000175193 | -0.337 | 2.80E-02 |
| <i>PIGQ</i>            | phosphatidylinositol glycan anchor biosynthesis class Q     | ENSG00000007541 | 0.279  | 2.80E-02 |
| <i>PNPLA7</i>          | patatin like phospholipase domain containing 7              | ENSG00000130653 | 1.050  | 2.80E-02 |
| <i>PRMT3</i>           | protein arginine methyltransferase 3                        | ENSG00000185238 | 0.412  | 2.80E-02 |
| <i>RP11_344N102</i>    |                                                             | ENSG00000237768 | 0.718  | 2.80E-02 |
| <i>RP11_958N242</i>    |                                                             | ENSG00000227827 | 0.941  | 2.80E-02 |
| <i>RP5_1021I205</i>    |                                                             | ENSG00000258891 | 0.718  | 2.80E-02 |
| <i>RPSAP47</i>         | ribosomal protein SA pseudogene 47                          | ENSG00000188856 | 1.089  | 2.80E-02 |
| <i>SF3A2</i>           | splicing factor 3a subunit 2                                | ENSG00000104897 | 0.238  | 2.80E-02 |
| <i>SNRPGP10</i>        | small nuclear ribonucleoprotein polypeptide G pseudogene 10 | ENSG00000235363 | -1.509 | 2.80E-02 |
| <i>SOCS5</i>           | suppressor of cytokine signaling 5                          | ENSG00000171150 | 0.319  | 2.80E-02 |
| <i>TMEM161A</i>        | transmembrane protein 161A                                  | ENSG00000064545 | -0.406 | 2.80E-02 |
| <i>WDR12</i>           | WD repeat domain 12                                         | ENSG00000138442 | 0.395  | 2.80E-02 |
| <i>ZNF48</i>           | zinc finger protein 48                                      | ENSG00000180035 | -0.487 | 2.80E-02 |
| <i>ZNF503-AS2</i>      | ZNF503 antisense RNA 2                                      | ENSG00000237149 | 0.481  | 2.80E-02 |
| <i>ZNF696</i>          | zinc finger protein 696                                     | ENSG00000185730 | 0.441  | 2.80E-02 |
| <i>GPHN</i>            | gephyrin                                                    | ENSG00000171723 | -0.786 | 2.80E-03 |

|                          |                                                                   |                 |        |          |
|--------------------------|-------------------------------------------------------------------|-----------------|--------|----------|
| <i>PRICKLE2-AS3</i>      | PRICKLE2 antisense RNA 3                                          | ENSG00000226017 | -1.420 | 2.80E-03 |
| <i>RIOX2</i>             | ribosomal oxygenase 2                                             | ENSG00000170854 | 0.467  | 2.80E-03 |
| <i>CISD3</i>             | CDGSH iron sulfur domain 3                                        | ENSG00000277972 | 0.296  | 2.90E-02 |
| <i>EGLN2</i>             | egl-9 family hypoxia inducible factor 2                           | ENSG00000269858 | -0.512 | 2.90E-02 |
| <i>GRIN3B</i>            | glutamate ionotropic receptor NMDA type subunit 3B                | ENSG00000116032 | -0.566 | 2.90E-02 |
| <i>LARP4</i>             | La ribonucleoprotein domain family member 4                       | ENSG00000161813 | 0.306  | 2.90E-02 |
| <i>MAN2B2</i>            | mannosidase alpha class 2B member 2                               | ENSG00000013288 | 0.252  | 2.90E-02 |
| <i>MRPS28</i>            | mitochondrial ribosomal protein S28                               | ENSG00000147586 | -0.483 | 2.90E-02 |
| <i>MTRR</i>              | 5-methyltetrahydrofolate-homocysteine methyltransferase reductase | ENSG00000124275 | -0.417 | 2.90E-02 |
| <i>OXCT1</i>             | 3-oxoacid CoA-transferase 1                                       | ENSG00000083720 | -0.392 | 2.90E-02 |
| <i>PRKCD</i>             | protein kinase C delta                                            | ENSG00000163932 | -0.377 | 2.90E-02 |
| <i>RAMAC</i>             | RNA guanine-7 methyltransferase activating subunit                | ENSG00000169612 | -0.547 | 2.90E-02 |
| <i>STARD3NL</i>          | STARD3 N-terminal like                                            | ENSG00000010270 | -0.270 | 2.90E-02 |
| <i>TGFB2</i>             | transforming growth factor beta 2                                 | ENSG00000092969 | 0.791  | 2.90E-02 |
| <i>TMEM19</i>            | transmembrane protein 19                                          | ENSG00000139291 | 0.365  | 2.90E-02 |
| <i>TMEM250</i>           | transmembrane protein 250                                         | ENSG00000238227 | 0.247  | 2.90E-02 |
| <i>VIRMA</i>             | vir like m6A methyltransferase associated                         | ENSG00000164944 | 0.259  | 2.90E-02 |
| <i>XXbac-BPG283O16.9</i> |                                                                   | ENSG00000280128 | 0.737  | 2.90E-02 |
| <i>ZNF407</i>            | zinc finger protein 407                                           | ENSG00000215421 | 0.433  | 2.90E-02 |
| <i>POMT1</i>             | protein O-mannosyltransferase 1                                   | ENSG00000130714 | -0.445 | 2.90E-03 |
| <i>TRAF3IP3</i>          | TRAF3 interacting protein 3                                       | ENSG00000009790 | 1.694  | 2.90E-03 |
| <i>CARD11</i>            | caspase recruitment domain family member 11                       | ENSG00000198286 | -0.540 | 2.90E-04 |
| <i>APOBEC3F</i>          | apolipoprotein B mRNA editing enzyme catalytic subunit 3F         | ENSG00000128394 | 0.892  | 3.00E-02 |
| <i>BICC1</i>             | BicC family RNA binding protein 1                                 | ENSG00000122870 | 0.241  | 3.00E-02 |
| <i>CRABP2</i>            | cellular retinoic acid binding protein 2                          | ENSG00000143320 | -1.344 | 3.00E-02 |
| <i>CTD_3193O138</i>      |                                                                   | ENSG00000269139 | 0.375  | 3.00E-02 |
| <i>FAM86C1</i>           | family with sequence similarity 86 member C1                      | ENSG00000158483 | -0.828 | 3.00E-02 |
| <i>MSS51</i>             | MSS51 mitochondrial translational activator                       | ENSG00000166343 | 1.589  | 3.00E-02 |
| <i>MTFR1L</i>            | mitochondrial fission regulator 1 like                            | ENSG00000117640 | -0.293 | 3.00E-02 |
| <i>MZF1-AS1</i>          | MZF1 antisense RNA 1                                              | ENSG00000267858 | 0.514  | 3.00E-02 |
| <i>PMM1</i>              | phosphomannomutase 1                                              | ENSG00000100417 | -0.367 | 3.00E-02 |
| <i>PUS10</i>             | pseudouridine synthase 10                                         | ENSG00000162927 | -0.803 | 3.00E-02 |
| <i>RP11_283G65</i>       |                                                                   | ENSG00000255750 | -1.106 | 3.00E-02 |
| <i>RP11_408P141</i>      |                                                                   | ENSG00000243199 | -1.344 | 3.00E-02 |
| <i>RP11_746M11</i>       |                                                                   | ENSG00000263986 | -0.266 | 3.00E-02 |
| <i>RP4_530I159</i>       |                                                                   | ENSG00000232043 | 0.692  | 3.00E-02 |
| <i>TIA1</i>              | TIA1 cytotoxic granule associated RNA binding protein             | ENSG00000116001 | -0.238 | 3.00E-02 |
| <i>UBAP2</i>             | ubiquitin associated protein 2                                    | ENSG00000137073 | -0.310 | 3.00E-02 |
| <i>YTHDF3</i>            | YTH N6-methyladenosine RNA binding protein 3                      | ENSG00000185728 | 0.239  | 3.00E-02 |
| <i>ASB16-AS1</i>         | ASB16 antisense RNA 1                                             | ENSG00000267080 | -0.838 | 3.00E-03 |
| <i>SPRED1</i>            | sprouty related EVH1 domain containing 1                          | ENSG00000166068 | 0.281  | 3.00E-03 |
| <i>STRBP</i>             | spermatid perinuclear RNA binding protein                         | ENSG00000165209 | -0.711 | 3.00E-03 |
| <i>UBQLN4</i>            | ubiquilin 4                                                       | ENSG00000160803 | 0.365  | 3.00E-03 |
| <i>AC0738343</i>         |                                                                   | ENSG00000237655 | 1.151  | 3.10E-02 |

|                          |                                                           |                 |        |          |
|--------------------------|-----------------------------------------------------------|-----------------|--------|----------|
| CPM                      | carboxypeptidase M                                        | ENSG00000135678 | 0.588  | 3.10E-02 |
| CUL7                     | cullin 7                                                  | ENSG00000044090 | 0.250  | 3.10E-02 |
| FAM189B                  | family with sequence similarity 189 member B              | ENSG00000160767 | 0.307  | 3.10E-02 |
| HSD17B10                 | hydroxysteroid 17-beta dehydrogenase 10                   | ENSG00000072506 | -0.300 | 3.10E-02 |
| HTR1D                    | 5-hydroxytryptamine receptor 1D                           | ENSG00000179546 | -0.497 | 3.10E-02 |
| KCP                      | kielin cysteine rich BMP regulator                        | ENSG00000135253 | -0.286 | 3.10E-02 |
| KLHDC1                   | kelch domain containing 1                                 | ENSG00000197776 | 1.352  | 3.10E-02 |
| MIPEP                    | mitochondrial intermediate peptidase                      | ENSG00000027001 | 0.480  | 3.10E-02 |
| MSRB3                    | methionine sulfoxide reductase B3                         | ENSG00000174099 | 0.245  | 3.10E-02 |
| MTMR4                    | myotubularin related protein 4                            | ENSG00000108389 | 0.310  | 3.10E-02 |
| NPIPA8 (includes others) | nuclear pore complex interacting protein family member A3 | ENSG00000183426 | 0.535  | 3.10E-02 |
| RCCD1                    | RCC1 domain containing 1                                  | ENSG00000166965 | -0.380 | 3.10E-02 |
| REXO1                    | RNA exonuclease 1 homolog                                 | ENSG00000079313 | 0.289  | 3.10E-02 |
| RP1_39G227               |                                                           | ENSG00000259943 | -1.105 | 3.10E-02 |
| RPS10P7                  | ribosomal protein S10 pseudogene 7                        | ENSG00000223396 | -1.306 | 3.10E-02 |
| SLC25A11                 | solute carrier family 25 member 11                        | ENSG00000108528 | -0.248 | 3.10E-02 |
| TRIM73/TRIM74            | tripartite motif containing 74                            | ENSG00000174353 | -1.306 | 3.10E-02 |
| TRIP11                   | thyroid hormone receptor interactor 11                    | ENSG00000100815 | 0.292  | 3.10E-02 |
| URB1-AS1                 | URB1 antisense RNA 1 (head to head)                       | ENSG00000256073 | -1.306 | 3.10E-02 |
| ZBTB33                   | zinc finger and BTB domain containing 33                  | ENSG00000177485 | 0.350  | 3.10E-02 |
| ZDHHC16                  | zinc finger DHHC-type containing 16                       | ENSG00000171307 | 0.301  | 3.10E-02 |
| JAZF1-AS1                | JAZF1 antisense RNA 1                                     | ENSG00000234336 | 1.186  | 3.10E-03 |
| NDUFB8                   | NADH:ubiquinone oxidoreductase subunit B8                 | ENSG00000166136 | 0.518  | 3.10E-03 |
| ASAH2B                   | N-acylsphingosine amidohydrolase 2B                       | ENSG00000204147 | 1.013  | 3.20E-02 |
| CAPN10-DT                | CAPN10 divergent transcript                               | ENSG00000260942 | -1.762 | 3.20E-02 |
| CRYZL1                   | crystallin zeta like 1                                    | ENSG00000205758 | -0.382 | 3.20E-02 |
| EBF1                     | EBF transcription factor 1                                | ENSG00000164330 | -0.397 | 3.20E-02 |
| EPHX4                    | epoxide hydrolase 4                                       | ENSG00000172031 | -1.762 | 3.20E-02 |
| LCA5                     | lebercilin LCA5                                           | ENSG00000135338 | 0.605  | 3.20E-02 |
| LOC100287808             | uncharacterized LOC100287808                              | ENSG00000277182 | 1.851  | 3.20E-02 |
| LOC105375304             | uncharacterized LOC105375304                              | ENSG00000225792 | 1.851  | 3.20E-02 |
| LRMDA                    | leucine rich melanocyte differentiation associated        | ENSG00000148655 | 0.756  | 3.20E-02 |
| LUCAT1                   | lung cancer associated transcript 1                       | ENSG00000248323 | -1.762 | 3.20E-02 |
| MN1                      | MN1 proto-oncogene, transcriptional regulator             | ENSG00000169184 | 0.410  | 3.20E-02 |
| MTATP6P1                 | MT-ATP6 pseudogene 1                                      | ENSG00000248527 | -0.238 | 3.20E-02 |
| RETREG1                  | reticulophagy regulator 1                                 | ENSG00000154153 | -0.662 | 3.20E-02 |
| RP11_304L192             |                                                           | ENSG00000260447 | 1.851  | 3.20E-02 |
| RP11_762I75              |                                                           | ENSG00000257390 | 0.506  | 3.20E-02 |
| WDR91                    | WD repeat domain 91                                       | ENSG00000105875 | -0.357 | 3.20E-02 |
| XRCC4                    | X-ray repair cross complementing 4                        | ENSG00000152422 | -0.597 | 3.20E-02 |
| ZNF517                   | zinc finger protein 517                                   | ENSG00000197363 | 0.572  | 3.20E-02 |
| ZSCAN21                  | zinc finger and SCAN domain containing 21                 | ENSG00000166529 | 0.756  | 3.20E-02 |
| CKB                      | creatine kinase B                                         | ENSG00000166165 | -1.789 | 3.20E-04 |
| MT-CO3                   | cytochrome c oxidase III                                  | ENSG00000198938 | -0.273 | 3.20E-04 |
| MXI1                     | MAX interactor 1, dimerization protein                    | ENSG00000119950 | -0.703 | 3.20E-04 |
| ASRGL1                   | asparaginase and isoaspartyl peptidase 1                  | ENSG00000162174 | -0.894 | 3.30E-02 |
| CHMP1B                   | charged multivesicular body protein 1B                    | ENSG00000255112 | 0.267  | 3.30E-02 |

|                        |                                                 |                 |        |          |
|------------------------|-------------------------------------------------|-----------------|--------|----------|
| <i>CREG1</i>           | cellular repressor of E1A stimulated genes 1    | ENSG00000143162 | 0.314  | 3.30E-02 |
| <i>DNAJC9-AS1</i>      | DNAJC9 antisense RNA 1                          | ENSG00000236756 | -0.474 | 3.30E-02 |
| <i>LA16C_313D1112</i>  |                                                 | ENSG00000261659 | -0.547 | 3.30E-02 |
| <i>MYBL2</i>           | MYB proto-oncogene like 2                       | ENSG00000101057 | 0.252  | 3.30E-02 |
| <i>POU6F1</i>          | POU class 6 homeobox 1                          | ENSG00000184271 | -0.632 | 3.30E-02 |
| <i>RP11_1055B88</i>    |                                                 | ENSG00000263271 | 0.986  | 3.30E-02 |
| <i>ZNF624</i>          | zinc finger protein 624                         | ENSG00000197566 | 0.986  | 3.30E-02 |
| <i>DCAF10</i>          | DDB1 and CUL4 associated factor 10              | ENSG00000122741 | -0.297 | 3.40E-02 |
| <i>DLGAP4-AS1</i>      | DLGAP4 antisense RNA 1                          | ENSG00000232907 | 0.334  | 3.40E-02 |
| <i>GNAQ</i>            | G protein subunit alpha q                       | ENSG00000156052 | 0.249  | 3.40E-02 |
| <i>GYPC</i>            | glycophorin C (Gerbich blood group)             | ENSG00000136732 | -0.278 | 3.40E-02 |
| <i>LINC01605</i>       | long intergenic non-protein coding RNA 1605     | ENSG00000253414 | 1.092  | 3.40E-02 |
| <i>LL22NC03_80A106</i> |                                                 | ENSG00000272779 | -0.997 | 3.40E-02 |
| <i>NFKBID</i>          | NFKB inhibitor delta                            | ENSG00000167604 | 1.092  | 3.40E-02 |
| <i>NMT2</i>            | N-myristoyltransferase 2                        | ENSG00000152465 | 0.263  | 3.40E-02 |
| <i>P3H3</i>            | prolyl 3-hydroxylase 3                          | ENSG00000110811 | 0.550  | 3.40E-02 |
| <i>RABGGTA</i>         | Rab geranylgeranyltransferase subunit alpha     | ENSG00000100949 | 0.406  | 3.40E-02 |
| <i>RP11_345P49</i>     |                                                 | ENSG00000272106 | -0.733 | 3.40E-02 |
| <i>RP11_436D103</i>    |                                                 | ENSG00000238280 | 0.576  | 3.40E-02 |
| <i>RP11_843P142</i>    |                                                 | ENSG00000250909 | -0.474 | 3.40E-02 |
| <i>SEMA5A</i>          | semaphorin 5A                                   | ENSG00000112902 | 0.203  | 3.40E-02 |
| <i>SHANK3</i>          | SH3 and multiple ankyrin repeat domains 3       | ENSG00000251322 | 0.461  | 3.40E-02 |
| <i>SOX15</i>           | SRY-box transcription factor 15                 | ENSG00000129194 | -0.997 | 3.40E-02 |
| <i>TMSB4XP4</i>        | TMSB4X pseudogene 4                             | ENSG00000223551 | 0.533  | 3.40E-02 |
| <i>TNFAIP2</i>         | TNF alpha induced protein 2                     | ENSG00000185215 | -0.733 | 3.40E-02 |
| <i>UPP1</i>            | uridine phosphorylase 1                         | ENSG00000183696 | -0.230 | 3.40E-02 |
| <i>WDR47</i>           | WD repeat domain 47                             | ENSG00000085433 | -0.344 | 3.40E-02 |
| <i>WLS</i>             | Wnt ligand secretion mediator                   | ENSG00000116729 | -0.179 | 3.40E-02 |
| <i>ZNF800</i>          | zinc finger protein 800                         | ENSG00000048405 | 0.517  | 3.40E-02 |
| <i>G0S2</i>            | G0/G1 switch 2                                  | ENSG00000123689 | -0.993 | 3.40E-03 |
| <i>AP0014695</i>       |                                                 | ENSG00000223901 | 0.640  | 3.50E-02 |
| <i>ATG14</i>           | autophagy related 14                            | ENSG00000126775 | 0.335  | 3.50E-02 |
| <i>DTNBP1</i>          | dystrobrevin binding protein 1                  | ENSG00000047579 | 0.611  | 3.50E-02 |
| <i>EIF4B</i>           | eukaryotic translation initiation factor 4B     | ENSG00000063046 | 0.171  | 3.50E-02 |
| <i>LZTS3</i>           | leucine zipper tumor suppressor family member 3 | ENSG00000088899 | -0.481 | 3.50E-02 |
| <i>MRPL40</i>          | mitochondrial ribosomal protein L40             | ENSG00000185608 | -0.548 | 3.50E-02 |
| <i>MTCO1P12</i>        | MT-CO1 pseudogene 12                            | ENSG00000237973 | 0.491  | 3.50E-02 |
| <i>NT5E</i>            | 5'-nucleotidase ecto                            | ENSG00000135318 | -0.218 | 3.50E-02 |
| <i>PARP11</i>          | poly(ADP-ribose) polymerase family member 11    | ENSG00000111224 | 0.555  | 3.50E-02 |
| <i>RAB10</i>           | RAB10, member RAS oncogene family               | ENSG00000084733 | 0.201  | 3.50E-02 |
| <i>RP11_18I1411</i>    |                                                 | ENSG00000273262 | 0.386  | 3.50E-02 |
| <i>RP11_304L198</i>    |                                                 | ENSG00000261532 | -0.547 | 3.50E-02 |
| <i>RP11_347C1211</i>   |                                                 | ENSG00000274653 | 0.803  | 3.50E-02 |
| <i>RP11_649E75</i>     |                                                 | ENSG00000258377 | 0.235  | 3.50E-02 |
| <i>SEMA6D</i>          | semaphorin 6D                                   | ENSG00000137872 | 0.492  | 3.50E-02 |
| <i>SSBP3</i>           | single stranded DNA binding protein 3           | ENSG00000157216 | -0.291 | 3.50E-02 |
| <i>USP38</i>           | ubiquitin specific peptidase 38                 | ENSG00000170185 | 0.315  | 3.50E-02 |
| <i>VMA21</i>           | vacuolar ATPase assembly factor VMA21           | ENSG00000160131 | -0.326 | 3.50E-02 |
| <i>ZFP36</i>           | ZFP36 ring finger protein                       | ENSG00000128016 | 0.640  | 3.50E-02 |

|                      |                                                                    |                 |        |          |
|----------------------|--------------------------------------------------------------------|-----------------|--------|----------|
| <i>MMP15</i>         | matrix metalloproteinase 15                                        | ENSG00000102996 | 0.608  | 3.50E-03 |
| <i>ZNF416</i>        | zinc finger protein 416                                            | ENSG00000083817 | 1.076  | 3.50E-03 |
| <i>RP11_135F93</i>   |                                                                    | ENSG00000280088 | 2.601  | 3.50E-04 |
| <i>AC0071926</i>     |                                                                    | ENSG00000269145 | 1.453  | 3.60E-02 |
| <i>BRICD5</i>        | BRICD5 domain containing 5                                         | ENSG00000182685 | -0.528 | 3.60E-02 |
| <i>CACNA1C-AS1</i>   | CACNA1C antisense RNA 1                                            | ENSG00000246627 | -1.813 | 3.60E-02 |
| <i>CCDC144NL-AS1</i> | CCDC144NL antisense RNA 1                                          | ENSG00000233098 | 0.250  | 3.60E-02 |
| <i>CCDC181</i>       | coiled-coil domain containing 181                                  | ENSG00000117477 | -1.813 | 3.60E-02 |
| <i>CTB_79E83</i>     |                                                                    | ENSG00000253683 | 2.222  | 3.60E-02 |
| <i>DDX28</i>         | DEAD-box helicase 28                                               | ENSG00000182810 | -0.469 | 3.60E-02 |
| <i>DICER1-AS1</i>    | DICER1 antisense RNA 1                                             | ENSG00000235706 | -1.074 | 3.60E-02 |
| <i>FAM72C/FAM72D</i> | family with sequence similarity 72 member D                        | ENSG00000263513 | -1.813 | 3.60E-02 |
| <i>FUT2</i>          | fucosyltransferase 2                                               | ENSG00000176920 | -1.813 | 3.60E-02 |
| <i>HIBCH</i>         | 3-hydroxyisobutyryl-CoA hydrolase                                  | ENSG00000198130 | 0.453  | 3.60E-02 |
| <i>LINC01572</i>     | long intergenic non-protein coding RNA 1572                        | ENSG00000261008 | 2.222  | 3.60E-02 |
| <i>LOC100130548</i>  | uncharacterized LOC100130548                                       | ENSG00000235138 | 2.222  | 3.60E-02 |
| <i>LOC339192</i>     | uncharacterized LOC339192                                          | ENSG00000267121 | 2.222  | 3.60E-02 |
| <i>MIATNB</i>        | MIAT neighbor                                                      | ENSG00000244625 | -1.419 | 3.60E-02 |
| <i>MLPH</i>          | melanophilin                                                       | ENSG00000115648 | -0.693 | 3.60E-02 |
| <i>OR7E38P</i>       | olfactory receptor family 7 subfamily E member 38 pseudogene       | ENSG00000183444 | -1.813 | 3.60E-02 |
| <i>OSBP</i>          | oxysterol binding protein                                          | ENSG00000110048 | 0.241  | 3.60E-02 |
| <i>PCDHGB1</i>       | protocadherin gamma subfamily B, 1                                 | ENSG00000254221 | 0.453  | 3.60E-02 |
| <i>PHB</i>           | prohibitin                                                         | ENSG00000167085 | -0.207 | 3.60E-02 |
| <i>PPCS</i>          | phosphopantothienoylcysteine synthetase                            | ENSG00000127125 | 0.327  | 3.60E-02 |
| <i>RP11_135A244</i>  |                                                                    | ENSG00000233825 | -0.797 | 3.60E-02 |
| <i>RP11_316O141</i>  |                                                                    | ENSG00000268603 | 2.222  | 3.60E-02 |
| <i>RP11_332H171</i>  |                                                                    | ENSG00000232959 | 0.927  | 3.60E-02 |
| <i>RP11_797A183</i>  |                                                                    | ENSG00000259652 | 2.222  | 3.60E-02 |
| <i>TMEM126A</i>      | transmembrane protein 126A                                         | ENSG00000171202 | -0.449 | 3.60E-02 |
| <i>UQCRCF1</i>       | ubiquinol-cytochrome c reductase, Rieske iron-sulfur polypeptide 1 | ENSG00000169021 | 0.277  | 3.60E-02 |
| <i>ZNF205</i>        | zinc finger protein 205                                            | ENSG00000122386 | -0.404 | 3.60E-02 |
| <i>ZNF497</i>        | zinc finger protein 497                                            | ENSG00000174586 | -0.458 | 3.60E-02 |
| <i>ZNF605</i>        | zinc finger protein 605                                            | ENSG00000196458 | -0.449 | 3.60E-02 |
| <i>CTD_2524L63</i>   |                                                                    | ENSG00000260037 | -1.985 | 3.60E-04 |
| <i>AP0007045</i>     |                                                                    | ENSG00000224790 | 1.216  | 3.70E-02 |
| <i>C5orf34</i>       | chromosome 5 open reading frame 34                                 | ENSG00000172244 | 0.767  | 3.70E-02 |
| <i>HCG4P7</i>        | HLA complex group 4 pseudogene 7                                   | ENSG00000230521 | -0.174 | 3.70E-02 |
| <i>HUNK</i>          | hormonally up-regulated Neu-associated kinase                      | ENSG00000142149 | 0.437  | 3.70E-02 |
| <i>IGSF9</i>         | immunoglobulin superfamily member 9                                | ENSG00000085552 | -1.141 | 3.70E-02 |
| <i>MED19</i>         | mediator complex subunit 19                                        | ENSG00000156603 | -0.441 | 3.70E-02 |
| <i>MORF4L2-AS1</i>   | MORF4L2 antisense RNA 1                                            | ENSG00000231154 | 1.395  | 3.70E-02 |
| <i>MTRNR2L12</i>     | MT-RNR2 like 12                                                    | ENSG00000269028 | -1.282 | 3.70E-02 |
| <i>MYEF2</i>         | myelin expression factor 2                                         | ENSG00000104177 | -0.297 | 3.70E-02 |
| <i>PAXIP1-AS1</i>    | PAXIP1 antisense RNA 1 (head to head)                              | ENSG00000273344 | 0.767  | 3.70E-02 |
| <i>RP11_23P136</i>   |                                                                    | ENSG00000174171 | 1.395  | 3.70E-02 |
| <i>RP11_257O52</i>   |                                                                    | ENSG00000279059 | -1.282 | 3.70E-02 |
| <i>RP11_483I135</i>  |                                                                    | ENSG00000260879 | 0.673  | 3.70E-02 |
| <i>STK16</i>         | serine/threonine kinase 16                                         | ENSG00000115661 | 0.320  | 3.70E-02 |

|                     |                                                                      |                 |        |          |
|---------------------|----------------------------------------------------------------------|-----------------|--------|----------|
| <i>SYDE2</i>        | synapse defective Rho GTPase homolog 2                               | ENSG00000097096 | 0.767  | 3.70E-02 |
| <i>TGDS</i>         | TDP-glucose 4,6-dehydratase                                          | ENSG00000088451 | 0.692  | 3.70E-02 |
| <i>USP53</i>        | ubiquitin specific peptidase 53                                      | ENSG00000145390 | 0.325  | 3.70E-02 |
| <i>XPO4</i>         | exportin 4                                                           | ENSG00000132953 | 0.349  | 3.70E-02 |
| <i>ZNF449</i>       | zinc finger protein 449                                              | ENSG00000173275 | -0.679 | 3.70E-02 |
| <i>AC1147307</i>    |                                                                      | ENSG00000234793 | 1.305  | 3.70E-03 |
| <i>AREG</i>         | amphiregulin                                                         | ENSG00000109321 | 1.010  | 3.80E-02 |
| <i>CTTNBP2NL</i>    | CTTNBP2 N-terminal like                                              | ENSG00000143079 | -0.270 | 3.80E-02 |
| <i>FNIP1</i>        | folliculin interacting protein 1                                     | ENSG00000217128 | 0.322  | 3.80E-02 |
| <i>MCCC1</i>        | methylocrotonoyl-CoA carboxylase 1                                   | ENSG00000078070 | 0.423  | 3.80E-02 |
| <i>MED15</i>        | mediator complex subunit 15                                          | ENSG00000099917 | -0.248 | 3.80E-02 |
| <i>MGARP</i>        | mitochondria localized glutamic acid rich protein                    | ENSG00000137463 | 0.239  | 3.80E-02 |
| <i>NDUFV3</i>       | NADH:ubiquinone oxidoreductase subunit V3                            | ENSG00000160194 | -0.383 | 3.80E-02 |
| <i>RAB24</i>        | RAB24, member RAS oncogene family                                    | ENSG00000169228 | -0.375 | 3.80E-02 |
| <i>RGL4</i>         | ral guanine nucleotide dissociation stimulator like 4                | ENSG00000159496 | -0.976 | 3.80E-02 |
| <i>RP5_1057I204</i> |                                                                      | ENSG00000268069 | 0.452  | 3.80E-02 |
| <i>RRAD</i>         | RRAD, Ras related glycolysis inhibitor and calcium channel regulator | ENSG00000166592 | -0.242 | 3.80E-02 |
| <i>RTN2</i>         | reticulum 2                                                          | ENSG00000125744 | -0.417 | 3.80E-02 |
| <i>SLC29A1</i>      | solute carrier family 29 member 1 (Augustine blood group)            | ENSG00000112759 | -0.260 | 3.80E-02 |
| <i>SRRM5</i>        | serine/arginine repetitive matrix 5                                  | ENSG00000226763 | 0.294  | 3.80E-02 |
| <i>STX12</i>        | syntaxin 12                                                          | ENSG00000117758 | -0.348 | 3.80E-02 |
| <i>SARNP</i>        | SAP domain containing ribonucleoprotein                              | ENSG00000205323 | -1.462 | 3.80E-03 |
| <i>AC0159332</i>    |                                                                      | ENSG00000227279 | -0.310 | 3.90E-02 |
| <i>AFG3L1P</i>      | AFG3 like matrix AAA peptidase subunit 1, pseudogene                 | ENSG00000223959 | 0.403  | 3.90E-02 |
| <i>ANGEL2</i>       | angel homolog 2                                                      | ENSG00000174606 | 0.359  | 3.90E-02 |
| <i>BAG4</i>         | BCL2 associated athanogene 4                                         | ENSG00000156735 | -0.389 | 3.90E-02 |
| <i>BAK1</i>         | BCL2 antagonist/killer 1                                             | ENSG00000030110 | 0.352  | 3.90E-02 |
| <i>BTRC</i>         | beta-transducin repeat containing E3 ubiquitin protein ligase        | ENSG00000166167 | -0.349 | 3.90E-02 |
| <i>CH17_264L241</i> |                                                                      | ENSG00000279278 | -2.061 | 3.90E-02 |
| <i>DCK</i>          | deoxycytidine kinase                                                 | ENSG00000156136 | 0.376  | 3.90E-02 |
| <i>DDX31</i>        | DEAD-box helicase 31                                                 | ENSG00000125485 | 0.452  | 3.90E-02 |
| <i>DNASE2</i>       | deoxyribonuclease 2, lysosomal                                       | ENSG00000105612 | 0.273  | 3.90E-02 |
| <i>ENAH</i>         | ENAH actin regulator                                                 | ENSG00000154380 | 0.158  | 3.90E-02 |
| <i>GOLT1B</i>       | golgi transport 1B                                                   | ENSG00000111711 | 0.299  | 3.90E-02 |
| <i>HOXA2</i>        | homeobox A2                                                          | ENSG00000105996 | 2.933  | 3.90E-02 |
| <i>LDAH</i>         | lipid droplet associated hydrolase                                   | ENSG00000118961 | 0.563  | 3.90E-02 |
| <i>LOC105372097</i> |                                                                      | ENSG00000270112 | -2.061 | 3.90E-02 |
| <i>PCDHB13</i>      | protocadherin beta 13                                                | ENSG00000187372 | 0.416  | 3.90E-02 |
| <i>RBM25</i>        | RNA binding motif protein 25                                         | ENSG00000119707 | -0.222 | 3.90E-02 |
| <i>ROGDI</i>        | rogdi atypical leucine zipper                                        | ENSG00000067836 | 0.451  | 3.90E-02 |
| <i>RP11_251G235</i> |                                                                      | ENSG00000272604 | -2.061 | 3.90E-02 |
| <i>RP11_495P103</i> |                                                                      | ENSG00000224481 | -2.061 | 3.90E-02 |
| <i>RP11_513D52</i>  |                                                                      | ENSG00000254898 | 0.764  | 3.90E-02 |
| <i>SPATC1L</i>      | spermatogenesis and centriole associated 1 like                      | ENSG00000160284 | 0.482  | 3.90E-02 |
| <i>TMEM14A</i>      | transmembrane protein 14A                                            | ENSG00000096092 | 0.372  | 3.90E-02 |

|                      |                                                                             |                 |        |          |
|----------------------|-----------------------------------------------------------------------------|-----------------|--------|----------|
| <i>TMPRSS6</i>       | transmembrane serine protease 6                                             | ENSG00000187045 | -2.061 | 3.90E-02 |
| <i>USF3</i>          | upstream transcription factor family member 3                               | ENSG00000176542 | 0.399  | 3.90E-02 |
| <i>ZNF730</i>        | zinc finger protein 730                                                     | ENSG00000183850 | -2.061 | 3.90E-02 |
| <i>ZNF574</i>        | zinc finger protein 574                                                     | ENSG00000105732 | 0.492  | 3.90E-03 |
| <i>ANKLE1</i>        | ankyrin repeat and LEM domain containing 1                                  | ENSG00000160117 | 2.524  | 4.00E-02 |
| <i>ASGR1</i>         | asialoglycoprotein receptor 1                                               | ENSG00000141505 | 2.524  | 4.00E-02 |
| <i>CHRM3</i>         | cholinergic receptor muscarinic 3                                           | ENSG00000133019 | 2.524  | 4.00E-02 |
| <i>COMMD5</i>        | COMM domain containing 5                                                    | ENSG00000170619 | -0.293 | 4.00E-02 |
| <i>EHHADH-AS1</i>    | EHHADH antisense RNA 1                                                      | ENSG00000223358 | 2.524  | 4.00E-02 |
| <i>FAM162A</i>       | family with sequence similarity 162 member A                                | ENSG00000114023 | -0.414 | 4.00E-02 |
| <i>FEM1B</i>         | fem-1 homolog B                                                             | ENSG00000169018 | 0.226  | 4.00E-02 |
| <i>GFPT2</i>         | glutamine-fructose-6-phosphate transaminase 2                               | ENSG00000131459 | -0.322 | 4.00E-02 |
| <i>GPR173</i>        | G protein-coupled receptor 173                                              | ENSG00000184194 | 0.537  | 4.00E-02 |
| <i>HMGNI1P38</i>     | high mobility group nucleosome binding domain 1 pseudogene 38               | ENSG00000253954 | 2.524  | 4.00E-02 |
| <i>KCNH3</i>         | potassium voltage-gated channel subfamily H member 3                        | ENSG00000135519 | 0.872  | 4.00E-02 |
| <i>LA16C_316G122</i> |                                                                             | ENSG00000260425 | 2.524  | 4.00E-02 |
| <i>LA16C_360H63</i>  |                                                                             | ENSG00000262899 | 2.524  | 4.00E-02 |
| <i>MIS18A</i>        | MIS18 kinetochore protein A                                                 | ENSG00000159055 | -0.414 | 4.00E-02 |
| <i>MZT2A</i>         | mitotic spindle organizing protein 2A                                       | ENSG00000173272 | -0.246 | 4.00E-02 |
| <i>PADI1</i>         | peptidyl arginine deiminase 1                                               | ENSG00000142623 | 2.524  | 4.00E-02 |
| <i>PSORS1C2</i>      | psoriasis susceptibility 1 candidate 2                                      | ENSG00000204538 | 2.524  | 4.00E-02 |
| <i>RP11-596C23.6</i> |                                                                             | ENSG00000282885 | 2.524  | 4.00E-02 |
| <i>RP11_288I211</i>  |                                                                             | ENSG00000237938 | -0.457 | 4.00E-02 |
| <i>RP11_29G83</i>    |                                                                             | ENSG00000261553 | 2.524  | 4.00E-02 |
| <i>RP11_677M145</i>  |                                                                             | ENSG00000254941 | 2.524  | 4.00E-02 |
| <i>RP1_239B225</i>   |                                                                             | ENSG00000260196 | 2.524  | 4.00E-02 |
| <i>SLC9A1</i>        | solute carrier family 9 member A1                                           | ENSG00000090020 | -0.275 | 4.00E-02 |
| <i>SULT1B1</i>       | sulfotransferase family 1B member 1                                         | ENSG00000173597 | 2.524  | 4.00E-02 |
| <i>TGIF1</i>         | TGFB induced factor homeobox 1                                              | ENSG00000177426 | -0.236 | 4.00E-02 |
| <i>UBOX5</i>         | U-box domain containing 5                                                   | ENSG00000185019 | 0.506  | 4.00E-02 |
| <i>ZNF442</i>        | zinc finger protein 442                                                     | ENSG00000198342 | 2.524  | 4.00E-02 |
| <i>ZNF625</i>        | zinc finger protein 625                                                     | ENSG00000257591 | 2.524  | 4.00E-02 |
| <i>POTEI</i>         | POTE ankyrin domain family member I                                         | ENSG00000196834 | 6.103  | 4.00E-03 |
| <i>RP11_428J14</i>   |                                                                             | ENSG00000271978 | 6.103  | 4.00E-03 |
| <i>TBX20</i>         | T-box transcription factor 20                                               | ENSG00000164532 | 6.103  | 4.00E-03 |
| <i>ANKRD18B</i>      | ankyrin repeat domain 18B                                                   | ENSG00000230453 | 1.141  | 4.10E-02 |
| <i>CAPS2</i>         | calcyphosine 2                                                              | ENSG00000180881 | 0.614  | 4.10E-02 |
| <i>CEP78</i>         | centrosomal protein 78                                                      | ENSG00000148019 | -0.314 | 4.10E-02 |
| <i>GMNN</i>          | geminin DNA replication inhibitor                                           | ENSG00000112312 | -0.338 | 4.10E-02 |
| <i>LOC101927572</i>  | uncharacterized LOC101927572                                                | ENSG00000267698 | 0.614  | 4.10E-02 |
| <i>MOSMO</i>         | modulator of smoothened                                                     | ENSG00000185716 | -0.465 | 4.10E-02 |
| <i>MRPL22</i>        | mitochondrial ribosomal protein L22                                         | ENSG00000082515 | -0.355 | 4.10E-02 |
| <i>PKD1P5</i>        | polycystin 1, transient receptor potential channel interacting pseudogene 5 | ENSG00000254681 | 0.350  | 4.10E-02 |
| <i>PMS2P1</i>        | PMS1 homolog 2, mismatch repair system component pseudogene 1               | ENSG00000078319 | -0.576 | 4.10E-02 |
| <i>PRRG4</i>         | proline rich and Gla domain 4                                               | ENSG00000135378 | 1.141  | 4.10E-02 |

|                     |                                                                        |                 |        |          |
|---------------------|------------------------------------------------------------------------|-----------------|--------|----------|
| <i>RPL27</i>        | ribosomal protein L27                                                  | ENSG00000131469 | -0.169 | 4.10E-02 |
| <i>TSPAN4</i>       | tetraspanin 4                                                          | ENSG00000214063 | -0.216 | 4.10E-02 |
| <i>CCDC68</i>       | coiled-coil domain containing 68                                       | ENSG00000166510 | -0.605 | 4.10E-03 |
| <i>LINC01391</i>    | long intergenic non-protein coding RNA 1391                            | ENSG00000244578 | 0.506  | 4.10E-03 |
| <i>TMEFF2</i>       | transmembrane protein with EGF like and two follistatin like domains 2 | ENSG00000144339 | 0.799  | 4.10E-03 |
| <i>A1BG-AS1</i>     | A1BG antisense RNA 1                                                   | ENSG00000268895 | -0.548 | 4.20E-02 |
| <i>AC00913315</i>   |                                                                        | ENSG00000259952 | 0.213  | 4.20E-02 |
| <i>CLDN12</i>       | claudin 12                                                             | ENSG00000157224 | -0.548 | 4.20E-02 |
| <i>HMGN3</i>        | high mobility group nucleosomal binding domain 3                       | ENSG00000118418 | -0.284 | 4.20E-02 |
| <i>LINC02693</i>    | long intergenic non-protein coding RNA 2693                            | ENSG00000212719 | 0.405  | 4.20E-02 |
| <i>LOC101928140</i> | uncharacterized LOC101928140                                           | ENSG00000227945 | 0.444  | 4.20E-02 |
| <i>MAP3K7</i>       | mitogen-activated protein kinase kinase kinase 7                       | ENSG00000135341 | 0.261  | 4.20E-02 |
| <i>NAA40</i>        | N(alpha)-acetyltransferase 40, NatD catalytic subunit                  | ENSG00000110583 | -0.325 | 4.20E-02 |
| <i>PSD3</i>         | pleckstrin and Sec7 domain containing 3                                | ENSG00000156011 | 0.172  | 4.20E-02 |
| <i>PTPDC1</i>       | protein tyrosine phosphatase domain containing 1                       | ENSG00000158079 | -0.550 | 4.20E-02 |
| <i>SNRNP25</i>      | small nuclear ribonucleoprotein U11/U12 subunit 25                     | ENSG00000161981 | -0.325 | 4.20E-02 |
| <i>TMEM25</i>       | transmembrane protein 25                                               | ENSG00000149582 | 0.359  | 4.20E-02 |
| <i>TSPAN11</i>      | tetraspanin 11                                                         | ENSG00000110900 | 0.375  | 4.20E-02 |
| <i>YPEL2</i>        | yippee like 2                                                          | ENSG00000175155 | 0.452  | 4.20E-02 |
| <i>ZACN</i>         | zinc activated ion channel                                             | ENSG00000186919 | -0.217 | 4.20E-02 |
| <i>LOXL4</i>        | lysyl oxidase like 4                                                   | ENSG00000138131 | 0.700  | 4.20E-03 |
| <i>PPAT</i>         | phosphoribosyl pyrophosphate amidotransferase                          | ENSG00000128059 | 0.726  | 4.20E-04 |
| <i>ARHGAP5</i>      | Rho GTPase activating protein 5                                        | ENSG00000100852 | 0.267  | 4.30E-02 |
| <i>BCDIN3D-AS1</i>  | BCDIN3D antisense RNA 1                                                | ENSG00000258057 | 0.700  | 4.30E-02 |
| <i>BST2</i>         | bone marrow stromal cell antigen 2                                     | ENSG00000130303 | 0.936  | 4.30E-02 |
| <i>ENGASE</i>       | endo-beta-N-acetylglucosaminidase                                      | ENSG00000167280 | 0.317  | 4.30E-02 |
| <i>ERI1</i>         | exoribonuclease 1                                                      | ENSG00000104626 | -0.411 | 4.30E-02 |
| <i>GCC1</i>         | GRIP and coiled-coil domain containing 1                               | ENSG00000179562 | 0.312  | 4.30E-02 |
| <i>GUCY1A2</i>      | guanylate cyclase 1 soluble subunit alpha 2                            | ENSG00000152402 | 1.100  | 4.30E-02 |
| <i>LAMTOR3</i>      | late endosomal/lysosomal adaptor, MAPK and MTOR activator 3            | ENSG00000109270 | 0.378  | 4.30E-02 |
| <i>LINC-PINT</i>    | long intergenic non-protein coding RNA, p53 induced transcript         | ENSG00000226380 | -1.620 | 4.30E-02 |
| <i>LINC00674</i>    | long intergenic non-protein coding RNA 674                             | ENSG00000237854 | 0.622  | 4.30E-02 |
| <i>LOC101928728</i> | uncharacterized LOC101928728                                           | ENSG00000260063 | -1.620 | 4.30E-02 |
| <i>LOC102724050</i> | uncharacterized LOC102724050                                           | ENSG00000258086 | 0.336  | 4.30E-02 |
| <i>LOC439933</i>    | uncharacterized LOC439933                                              | ENSG00000247193 | 1.535  | 4.30E-02 |
| <i>LRRC2</i>        | leucine rich repeat containing 2                                       | ENSG00000163827 | 0.387  | 4.30E-02 |
| <i>NFIA</i>         | nuclear factor I A                                                     | ENSG00000162599 | 0.819  | 4.30E-02 |
| <i>RP11_289I102</i> |                                                                        | ENSG00000223612 | 1.617  | 4.30E-02 |
| <i>RP11_517O131</i> |                                                                        | ENSG00000258378 | -0.815 | 4.30E-02 |
| <i>RP11_582J163</i> |                                                                        | ENSG00000254230 | 0.310  | 4.30E-02 |
| <i>SENP8</i>        | SUMO peptidase family member, NEDD8                                    | ENSG00000166192 | -0.815 | 4.30E-02 |



|                     |                                                                  |                 |        |          |
|---------------------|------------------------------------------------------------------|-----------------|--------|----------|
|                     | specific                                                         |                 |        |          |
| <i>SLC4A5</i>       | solute carrier family 4 member 5                                 | ENSG00000188687 | -0.815 | 4.30E-02 |
| <i>SNX12</i>        | sorting nexin 12                                                 | ENSG00000147164 | 0.236  | 4.30E-02 |
| <i>SPATA6</i>       | spermatogenesis associated 6                                     | ENSG00000132122 | 0.822  | 4.30E-02 |
| <i>TEAD1</i>        | TEA domain transcription factor 1                                | ENSG00000187079 | 0.173  | 4.30E-02 |
| <i>TNFRSF11B</i>    | TNF receptor superfamily member 11b                              | ENSG00000164761 | 0.622  | 4.30E-02 |
| <i>TRIT1</i>        | tRNA isopentenyltransferase 1                                    | ENSG00000043514 | 0.495  | 4.30E-02 |
| <i>TRPV4</i>        | transient receptor potential cation channel subfamily V member 4 | ENSG00000111199 | -0.781 | 4.30E-02 |
| <i>ZBTB21</i>       | zinc finger and BTB domain containing 21                         | ENSG00000173276 | 0.347  | 4.30E-02 |
| <i>ZNF345</i>       | zinc finger protein 345                                          | ENSG00000251247 | -1.403 | 4.30E-02 |
| <i>ZNF7</i>         | zinc finger protein 7                                            | ENSG00000147789 | -0.374 | 4.30E-02 |
| <i>ZSCAN5A</i>      | zinc finger and SCAN domain containing 5A                        | ENSG00000131848 | 0.822  | 4.30E-02 |
| <i>COL24A1</i>      | collagen type XXIV alpha 1 chain                                 | ENSG00000171502 | -1.580 | 4.30E-03 |
| <i>HOXA-AS3</i>     | HOXA cluster antisense RNA 3                                     | ENSG00000254369 | -1.091 | 4.30E-03 |
| <i>MTERF4</i>       | mitochondrial transcription termination factor 4                 | ENSG00000122085 | 0.522  | 4.30E-03 |
| <i>NOXO1</i>        | NADPH oxidase organizer 1                                        | ENSG00000196408 | -1.091 | 4.30E-03 |
| <i>RP11_486F171</i> |                                                                  | ENSG00000257045 | -1.580 | 4.30E-03 |
| <i>RP4_742J242</i>  |                                                                  | ENSG00000236526 | 1.011  | 4.30E-03 |
| <i>AC0742125</i>    |                                                                  | ENSG00000259605 | 0.305  | 4.40E-02 |
| <i>ANXA4</i>        | annexin A4                                                       | ENSG00000196975 | -0.236 | 4.40E-02 |
| <i>BLMH</i>         | bleomycin hydrolase                                              | ENSG00000108578 | -0.294 | 4.40E-02 |
| <i>DDAH2</i>        | dimethylarginine dimethylaminohydrolase 2                        | ENSG00000213722 | 0.311  | 4.40E-02 |
| <i>EMC6</i>         | ER membrane protein complex subunit 6                            | ENSG00000127774 | -0.295 | 4.40E-02 |
| <i>RP11_152P232</i> |                                                                  | ENSG00000260350 | -0.412 | 4.40E-02 |
| <i>RP11_566K114</i> |                                                                  | ENSG00000259006 | -0.908 | 4.40E-02 |
| <i>SLC7A11</i>      | solute carrier family 7 member 11                                | ENSG00000151012 | 0.182  | 4.40E-02 |
| <i>STS</i>          | steroid sulfatase                                                | ENSG00000101846 | 0.420  | 4.40E-02 |
| <i>TGM2</i>         | transglutaminase 2                                               | ENSG00000198959 | -0.303 | 4.40E-02 |
| <i>ZSCAN25</i>      | zinc finger and SCAN domain containing 25                        | ENSG00000197037 | -0.575 | 4.40E-02 |
| <i>CTD_2017D111</i> |                                                                  | ENSG00000268362 | -1.787 | 4.40E-03 |
| <i>DAW1</i>         | dynein assembly factor with WD repeats 1                         | ENSG00000123977 | 3.344  | 4.40E-03 |
| <i>DLEC1</i>        | DLEC1 cilia and flagella associated protein                      | ENSG00000008226 | 0.656  | 4.40E-03 |
| <i>LOC101928663</i> | uncharacterized LOC101928663                                     | ENSG00000168405 | -2.471 | 4.40E-03 |
| <i>PPP1R35</i>      | protein phosphatase 1 regulatory subunit 35                      | ENSG00000160813 | -0.538 | 4.40E-03 |
| <i>RP11_592N211</i> |                                                                  | ENSG00000212664 | 1.968  | 4.40E-03 |
| <i>ZNF197</i>       | zinc finger protein 197                                          | ENSG00000186448 | 0.494  | 4.40E-03 |
| <i>AC0021171</i>    |                                                                  | ENSG00000224505 | -1.232 | 4.40E-04 |
| <i>AC022007.1</i>   |                                                                  | ENSG00000206567 | 1.523  | 4.50E-02 |
| <i>ANKH</i>         | ANKH inorganic pyrophosphate transport regulator                 | ENSG00000154122 | -0.195 | 4.50E-02 |
| <i>C1orf112</i>     | chromosome 1 open reading frame 112                              | ENSG00000000460 | 0.344  | 4.50E-02 |
| <i>C1QTNF6</i>      | C1q and TNF related 6                                            | ENSG00000133466 | 0.471  | 4.50E-02 |
| <i>DCHS1</i>        | dachsous cadherin-related 1                                      | ENSG00000166341 | -1.228 | 4.50E-02 |
| <i>ENO2</i>         | enolase 2                                                        | ENSG00000111674 | -0.373 | 4.50E-02 |
| <i>H2BC5</i>        | H2B clustered histone 5                                          | ENSG00000158373 | 1.295  | 4.50E-02 |
| <i>NEK10</i>        | NIMA related kinase 10                                           | ENSG00000163491 | 1.523  | 4.50E-02 |
| <i>OLFML2B</i>      | olfactomedin like 2B                                             | ENSG00000162745 | 1.295  | 4.50E-02 |

|                     |                                                           |                 |        |          |
|---------------------|-----------------------------------------------------------|-----------------|--------|----------|
| <i>OXA1L</i>        | OXA1L mitochondrial inner membrane protein                | ENSG00000155463 | -0.247 | 4.50E-02 |
| <i>RAB3A</i>        | RAB3A, member RAS oncogene family                         | ENSG00000105649 | 1.295  | 4.50E-02 |
| <i>RILPL2</i>       | Rab interacting lysosomal protein like 2                  | ENSG00000150977 | 0.441  | 4.50E-02 |
| <i>RP11_240G225</i> |                                                           | ENSG00000274554 | 1.523  | 4.50E-02 |
| <i>RP11_413H222</i> |                                                           | ENSG00000260621 | 0.441  | 4.50E-02 |
| <i>RP11_537A69</i>  |                                                           | ENSG00000233144 | -0.344 | 4.50E-02 |
| <i>RPL30</i>        | ribosomal protein L30                                     | ENSG00000156482 | -0.169 | 4.50E-02 |
| <i>RPS17</i>        | ribosomal protein S17                                     | ENSG00000182774 | -0.161 | 4.50E-02 |
| <i>SCAND2P</i>      | SCAN domain containing 2 pseudogene                       | ENSG00000176700 | 0.300  | 4.50E-02 |
| <i>SERPINF1</i>     | serpin family F member 1                                  | ENSG00000132386 | 1.523  | 4.50E-02 |
| <i>SLFN12</i>       | schlafen family member 12                                 | ENSG00000172123 | -0.373 | 4.50E-02 |
| <i>STMP1</i>        | short transmembrane mitochondrial protein 1               | ENSG00000243317 | -0.287 | 4.50E-02 |
| <i>TGS1</i>         | trimethylguanosine synthase 1                             | ENSG00000137574 | -0.328 | 4.50E-02 |
| <i>TMCO6</i>        | transmembrane and coiled-coil domains 6                   | ENSG00000113119 | 0.654  | 4.50E-02 |
| <i>TMUB2</i>        | transmembrane and ubiquitin like domain containing 2      | ENSG00000168591 | -0.302 | 4.50E-02 |
| <i>TTC3-AS1</i>     | TTC3 antisense RNA 1                                      | ENSG00000228677 | -0.446 | 4.50E-02 |
| <i>ZC3H4</i>        | zinc finger CCCH-type containing 4                        | ENSG00000130749 | 0.222  | 4.50E-02 |
| <i>CTC_506B81</i>   |                                                           | ENSG00000249180 | -0.495 | 4.50E-03 |
| <i>MKKS</i>         | McKusick-Kaufman syndrome                                 | ENSG00000125863 | -0.470 | 4.50E-03 |
| <i>PIN4</i>         | peptidylprolyl cis/trans isomerase, NIMA-interacting 4    | ENSG00000102309 | -0.588 | 4.50E-03 |
| <i>ARAP1</i>        | ArfGAP with RhoGAP domain, ankyrin repeat and PH domain 1 | ENSG00000186635 | 0.200  | 4.60E-02 |
| <i>ASTE1</i>        | asteroid homolog 1                                        | ENSG00000034533 | 0.419  | 4.60E-02 |
| <i>CIPC</i>         | CLOCK interacting pacemaker                               | ENSG00000198894 | -0.456 | 4.60E-02 |
| <i>DIXDC1</i>       | DIX domain containing 1                                   | ENSG00000150764 | 0.346  | 4.60E-02 |
| <i>FBXO48</i>       | F-box protein 48                                          | ENSG00000204923 | 1.049  | 4.60E-02 |
| <i>HAS3</i>         | hyaluronan synthase 3                                     | ENSG00000103044 | 0.351  | 4.60E-02 |
| <i>METTL17</i>      | methyltransferase like 17                                 | ENSG00000165792 | -0.285 | 4.60E-02 |
| <i>PHLPP1</i>       | PH domain and leucine rich repeat protein phosphatase 1   | ENSG00000081913 | -0.493 | 4.60E-02 |
| <i>RAB30</i>        | RAB30, member RAS oncogene family                         | ENSG00000137502 | -0.384 | 4.60E-02 |
| <i>RASSF2</i>       | Ras association domain family member 2                    | ENSG00000101265 | 0.525  | 4.60E-02 |
| <i>RP11-96L14.7</i> |                                                           | ENSG00000236782 | 0.405  | 4.60E-02 |
| <i>RP11_758P172</i> |                                                           | ENSG00000241357 | -0.650 | 4.60E-02 |
| <i>WDR83OS</i>      | WD repeat domain 83 opposite strand                       | ENSG00000105583 | 0.242  | 4.60E-02 |
| <i>ZNF26</i>        | zinc finger protein 26                                    | ENSG00000198393 | 0.572  | 4.60E-02 |
| <i>ELOVL2</i>       | ELOVL fatty acid elongase 2                               | ENSG00000197977 | 2.241  | 4.60E-03 |
| <i>H2AZ1-DT</i>     | H2AZ1 divergent transcript                                | ENSG00000245322 | -0.352 | 4.60E-04 |
| <i>ABCF2</i>        | ATP binding cassette subfamily F member 2                 | ENSG00000033050 | -0.239 | 4.70E-02 |
| <i>CLASRP</i>       | CLK4 associating serine/arginine rich protein             | ENSG00000104859 | -0.240 | 4.70E-02 |
| <i>CTTNBP2</i>      | cortactin binding protein 2                               | ENSG00000077063 | 0.742  | 4.70E-02 |
| <i>CUL1</i>         | cullin 1                                                  | ENSG00000055130 | -0.233 | 4.70E-02 |
| <i>FZD1</i>         | frizzled class receptor 1                                 | ENSG00000157240 | -0.295 | 4.70E-02 |
| <i>GPATCH1</i>      | G-patch domain containing 1                               | ENSG00000076650 | -0.528 | 4.70E-02 |
| <i>KLHL26</i>       | kelch like family member 26                               | ENSG00000167487 | 0.548  | 4.70E-02 |
| <i>LPCAT4</i>       | lysophosphatidylcholine acyltransferase 4                 | ENSG00000176454 | -0.331 | 4.70E-02 |
| <i>PPARA</i>        | peroxisome proliferator activated receptor alpha          | ENSG00000186951 | 0.386  | 4.70E-02 |

|                     |                                                                |                 |        |          |
|---------------------|----------------------------------------------------------------|-----------------|--------|----------|
| <i>PTPRU</i>        | protein tyrosine phosphatase receptor type U                   | ENSG00000060656 | 0.346  | 4.70E-02 |
| <i>TAF8</i>         | TATA-box binding protein associated factor 8                   | ENSG00000137413 | -0.339 | 4.70E-02 |
| <i>TNFSF4</i>       | TNF superfamily member 4                                       | ENSG00000117586 | 0.494  | 4.70E-02 |
| <i>UACA</i>         | uveal autoantigen with coiled-coil domains and ankyrin repeats | ENSG00000137831 | -0.222 | 4.70E-02 |
| <i>NUDT15</i>       | nudix hydrolase 15                                             | ENSG00000136159 | -0.550 | 4.70E-03 |
| <i>NXN</i>          | nucleoredoxin                                                  | ENSG00000167693 | 0.440  | 4.70E-03 |
| <i>RP4_773N104</i>  |                                                                | ENSG00000258634 | -0.743 | 4.70E-03 |
| <i>TBC1D10A</i>     | TBC1 domain family member 10A                                  | ENSG00000099992 | 0.717  | 4.70E-03 |
| <i>CDKN2AIP</i>     | CDKN2A interacting protein                                     | ENSG00000168564 | 0.632  | 4.70E-04 |
| <i>AC0052622</i>    |                                                                | ENSG00000267688 | -0.340 | 4.80E-02 |
| <i>AC005301.9</i>   |                                                                | ENSG00000283633 | 0.860  | 4.80E-02 |
| <i>DNAJC25</i>      | DnaJ heat shock protein family (Hsp40) member C25              | ENSG00000059769 | -0.610 | 4.80E-02 |
| <i>FAM72A</i>       | family with sequence similarity 72 member A                    | ENSG00000196550 | 0.860  | 4.80E-02 |
| <i>FOXP4</i>        | forkhead box P4                                                | ENSG00000137166 | 0.239  | 4.80E-02 |
| <i>GON7</i>         | GON7 subunit of KEOPS complex                                  | ENSG00000170270 | -0.658 | 4.80E-02 |
| <i>GSDMB</i>        | gasdermin B                                                    | ENSG00000073605 | -0.835 | 4.80E-02 |
| <i>HECA</i>         | hdc homolog, cell cycle regulator                              | ENSG00000112406 | 0.291  | 4.80E-02 |
| <i>LOC103611081</i> | uncharacterized LOC103611081                                   | ENSG00000255455 | 0.645  | 4.80E-02 |
| <i>MAL2</i>         | mal, T cell differentiation protein 2 (gene/pseudogene)        | ENSG00000147676 | -0.886 | 4.80E-02 |
| <i>MED17</i>        | mediator complex subunit 17                                    | ENSG00000042429 | 0.304  | 4.80E-02 |
| <i>MICU3</i>        | mitochondrial calcium uptake family member 3                   | ENSG00000155970 | 0.893  | 4.80E-02 |
| <i>NEXN-AS1</i>     | NEXN antisense RNA 1                                           | ENSG00000235927 | -0.647 | 4.80E-02 |
| <i>POLH</i>         | DNA polymerase eta                                             | ENSG00000170734 | 0.354  | 4.80E-02 |
| <i>PPIL4</i>        | peptidylprolyl isomerase like 4                                | ENSG00000131013 | -0.341 | 4.80E-02 |
| <i>PRRX1</i>        | paired related homeobox 1                                      | ENSG00000116132 | -0.320 | 4.80E-02 |
| <i>RAB11FIP1P1</i>  | RAB11 family interacting protein 1 pseudogene 1                | ENSG00000228492 | -0.886 | 4.80E-02 |
| <i>RAP1GAP2</i>     | RAP1 GTPase activating protein 2                               | ENSG00000132359 | 0.630  | 4.80E-02 |
| <i>REXO2</i>        | RNA exonuclease 2                                              | ENSG00000076043 | -0.192 | 4.80E-02 |
| <i>SOAT1</i>        | sterol O-acyltransferase 1                                     | ENSG00000057252 | 0.275  | 4.80E-02 |
| <i>STK26</i>        | serine/threonine kinase 26                                     | ENSG00000134602 | 0.471  | 4.80E-02 |
| <i>STX5</i>         | syntaxin 5                                                     | ENSG00000162236 | 0.244  | 4.80E-02 |
| <i>TMEM134</i>      | transmembrane protein 134                                      | ENSG00000172663 | 0.321  | 4.80E-02 |
| <i>U731662</i>      |                                                                | ENSG00000230454 | -0.835 | 4.80E-02 |
| <i>ZNF121</i>       | zinc finger protein 121                                        | ENSG00000197961 | -0.415 | 4.80E-02 |
| <i>NT5C</i>         | 5', 3'-nucleotidase, cytosolic                                 | ENSG00000125458 | -0.371 | 4.80E-03 |
| <i>ARSJ</i>         | arylsulfatase family member J                                  | ENSG00000180801 | 0.460  | 4.90E-02 |
| <i>C12orf65</i>     | chromosome 12 open reading frame 65                            | ENSG00000130921 | -0.360 | 4.90E-02 |
| <i>C3orf38</i>      | chromosome 3 open reading frame 38                             | ENSG00000179021 | 0.357  | 4.90E-02 |
| <i>CFAP97</i>       | cilia and flagella associated protein 97                       | ENSG00000164323 | -0.263 | 4.90E-02 |
| <i>GNAS</i>         | GNAS complex locus                                             | ENSG00000087460 | -0.152 | 4.90E-02 |
| <i>RANGRF</i>       | RAN guanine nucleotide release factor                          | ENSG00000108961 | -0.394 | 4.90E-02 |
| <i>SCLT1</i>        | sodium channel and clathrin linker 1                           | ENSG00000151466 | -0.416 | 4.90E-02 |
| <i>TGFB1</i>        | transforming growth factor beta induced                        | ENSG00000120708 | -0.229 | 4.90E-02 |
| <i>TRAPPC5</i>      | trafficking protein particle complex 5                         | ENSG00000181029 | -0.552 | 4.90E-02 |
| <i>WTAP</i>         | WT1 associated protein                                         | ENSG00000146457 | -0.229 | 4.90E-02 |

|                     |                                                                        |                 |        |          |
|---------------------|------------------------------------------------------------------------|-----------------|--------|----------|
| <i>ABCA8</i>        | ATP binding cassette subfamily A member 8                              | ENSG00000141338 | -0.550 | 5.00E-02 |
| <i>AC0052532</i>    |                                                                        | ENSG00000268030 | -0.507 | 5.00E-02 |
| <i>ANXA10</i>       | annexin A10                                                            | ENSG00000109511 | 0.497  | 5.00E-02 |
| <i>ARHGAP24</i>     | Rho GTPase activating protein 24                                       | ENSG00000138639 | 0.273  | 5.00E-02 |
| <i>BFSP1</i>        | beaded filament structural protein 1                                   | ENSG00000125864 | -1.637 | 5.00E-02 |
| <i>CAND2</i>        | cullin associated and neddylation dissociated 2 (putative)             | ENSG00000144712 | 1.759  | 5.00E-02 |
| <i>FAM102B</i>      | family with sequence similarity 102 member B                           | ENSG00000162636 | 0.460  | 5.00E-02 |
| <i>FSD1L</i>        | fibronectin type III and SPRY domain containing 1 like                 | ENSG00000106701 | -0.671 | 5.00E-02 |
| <i>FSIP1</i>        | fibrous sheath interacting protein 1                                   | ENSG00000150667 | 1.759  | 5.00E-02 |
| <i>LOC729732</i>    | uncharacterized LOC729732                                              | ENSG00000283674 | 1.759  | 5.00E-02 |
| <i>LRIG3</i>        | leucine rich repeats and immunoglobulin like domains 3                 | ENSG00000139263 | -1.007 | 5.00E-02 |
| <i>MLH3</i>         | mutL homolog 3                                                         | ENSG00000119684 | 0.399  | 5.00E-02 |
| <i>MT-ND4</i>       | NADH dehydrogenase, subunit 4 (complex I)                              | ENSG00000198886 | -0.147 | 5.00E-02 |
| <i>NDUFA2</i>       | NADH:ubiquinone oxidoreductase subunit A2                              | ENSG00000131495 | -0.268 | 5.00E-02 |
| <i>NDUFAF3</i>      | NADH:ubiquinone oxidoreductase complex assembly factor 3               | ENSG00000178057 | 0.255  | 5.00E-02 |
| <i>PLEKHM3</i>      | pleckstrin homology domain containing M3                               | ENSG00000178385 | -0.405 | 5.00E-02 |
| <i>RP11_143K117</i> |                                                                        | ENSG00000277728 | -1.007 | 5.00E-02 |
| <i>RP11_144G612</i> |                                                                        | ENSG00000254929 | -1.637 | 5.00E-02 |
| <i>RP11_334E610</i> |                                                                        | ENSG00000245385 | -0.361 | 5.00E-02 |
| <i>RP11_481J24</i>  |                                                                        | ENSG00000276259 | -0.581 | 5.00E-02 |
| <i>RP11_65L32</i>   |                                                                        | ENSG00000270277 | -1.637 | 5.00E-02 |
| <i>RPL35</i>        | ribosomal protein L35                                                  | ENSG00000136942 | -0.162 | 5.00E-02 |
| <i>RPL37A</i>       | ribosomal protein L37a                                                 | ENSG00000197756 | -0.157 | 5.00E-02 |
| <i>SFI1</i>         | SFI1 centrin binding protein                                           | ENSG00000198089 | 0.388  | 5.00E-02 |
| <i>SPIN1</i>        | spindlin 1                                                             | ENSG00000106723 | 0.195  | 5.00E-02 |
| <i>TCEAL9</i>       | transcription elongation factor A like 9                               | ENSG00000185222 | 0.229  | 5.00E-02 |
| <i>XKR6</i>         | XK related 6                                                           | ENSG00000171044 | 0.570  | 5.00E-02 |
| <i>CABLES1</i>      | Cdk5 and Abl enzyme substrate 1                                        | ENSG00000134508 | 0.553  | 5.00E-03 |
| <i>XYLB</i>         | xylulokinase                                                           | ENSG00000093217 | 1.727  | 5.00E-03 |
| <i>TFPI2</i>        | tissue factor pathway inhibitor 2                                      | ENSG00000105825 | -1.261 | 5.00E-04 |
| <i>LINC01138</i>    | long intergenic non-protein coding RNA 1138                            | ENSG00000274020 | 0.897  | 5.10E-03 |
| <i>RASSF10</i>      | Ras association domain family member 10                                | ENSG00000189431 | -6.761 | 5.10E-04 |
| <i>ARHGEF28</i>     | Rho guanine nucleotide exchange factor 28                              | ENSG00000214944 | -0.434 | 5.20E-04 |
| <i>MYLIP</i>        | myosin regulatory light chain interacting protein                      | ENSG00000007944 | -0.817 | 5.30E-04 |
| <i>ING1</i>         | inhibitor of growth family member 1                                    | ENSG00000153487 | -0.421 | 5.40E-03 |
| <i>SF3A3</i>        | splicing factor 3a subunit 3                                           | ENSG00000183431 | -0.314 | 5.40E-03 |
| <i>SPACA6</i>       | sperm acrosome associated 6                                            | ENSG00000182310 | -0.642 | 5.40E-03 |
| <i>TAF1A</i>        | TATA-box binding protein associated factor, RNA polymerase I subunit A | ENSG00000143498 | -1.321 | 5.40E-04 |
| <i>PIAS4</i>        | protein inhibitor of activated STAT 4                                  | ENSG00000105229 | 0.428  | 5.50E-03 |
| <i>ANKRD34A</i>     | ankyrin repeat domain 34A                                              | ENSG00000272031 | 1.997  | 5.50E-04 |
| <i>ATP5PF</i>       | ATP synthase peripheral stalk subunit F6                               | ENSG00000154723 | -0.341 | 5.60E-03 |
| <i>HAND2-AS1</i>    | HAND2 antisense RNA 1                                                  | ENSG00000237125 | -1.664 | 5.60E-03 |

|                                |                                                           |                 |        |          |
|--------------------------------|-----------------------------------------------------------|-----------------|--------|----------|
| <i>MAT2B</i>                   | methionine adenosyltransferase 2B                         | ENSG00000038274 | -0.310 | 5.60E-03 |
| <i>MEIS3</i>                   | Meis homeobox 3                                           | ENSG00000105419 | -1.010 | 5.60E-03 |
| <i>RNPC3</i>                   | RNA binding region (RNP1, RRM) containing 3               | ENSG00000185946 | -0.819 | 5.60E-03 |
| <i>SLC25A13</i>                | solute carrier family 25 member 13                        | ENSG00000004864 | -0.494 | 5.60E-03 |
| <i>STX1A</i>                   | syntaxin 1A                                               | ENSG00000106089 | -0.509 | 5.60E-03 |
| <i>TCF7</i>                    | transcription factor 7                                    | ENSG00000081059 | 0.989  | 5.60E-03 |
| <i>ZNF502</i>                  | zinc finger protein 502                                   | ENSG00000196653 | 1.883  | 5.60E-03 |
| <i>SHROOM2</i>                 | shroom family member 2                                    | ENSG00000146950 | 0.723  | 5.60E-04 |
| <i>MRPL45</i>                  | mitochondrial ribosomal protein L45                       | ENSG00000278845 | 0.443  | 5.70E-03 |
| <i>RELL2</i>                   | RELT like 2                                               | ENSG00000164620 | -0.698 | 5.70E-04 |
| <i>AGAP5 (includes others)</i> | ArfGAP with GTPase domain, ankyrin repeat and PH domain 5 | ENSG00000188234 | 1.134  | 5.80E-03 |
| <i>ARSG</i>                    | arylsulfatase G                                           | ENSG00000141337 | -0.551 | 5.80E-03 |
| <i>CCDC91</i>                  | coiled-coil domain containing 91                          | ENSG00000123106 | -0.509 | 5.80E-03 |
| <i>LOC102606465</i>            | uncharacterized LOC102606465                              | ENSG00000233184 | -1.003 | 5.80E-03 |
| <i>TBC1D12</i>                 | TBC1 domain family member 12                              | ENSG00000108239 | 0.527  | 5.80E-03 |
| <i>SSBP2</i>                   | single stranded DNA binding protein 2                     | ENSG00000145687 | -0.595 | 5.90E-03 |
| <i>AC0057899</i>               |                                                           | ENSG00000267090 | 2.490  | 5.90E-04 |
| <i>ST7-AS2</i>                 | ST7 antisense RNA 2                                       | ENSG00000226367 | 2.490  | 5.90E-04 |
| <i>COX11</i>                   | cytochrome c oxidase copper chaperone COX11               | ENSG00000166260 | 0.413  | 6.00E-03 |
| <i>RP11_110I16</i>             |                                                           | ENSG00000255114 | -0.378 | 6.00E-03 |
| <i>LOC101928525</i>            | uncharacterized LOC101928525                              | ENSG00000226706 | 0.566  | 6.10E-03 |
| <i>RP11_109D202</i>            |                                                           | ENSG00000259352 | -0.785 | 6.10E-03 |
| <i>TEX30</i>                   | testis expressed 30                                       | ENSG00000151287 | 0.728  | 6.10E-03 |
| <i>RP11_843B152</i>            |                                                           | ENSG00000257530 | 1.326  | 6.20E-03 |
| <i>TAF4B</i>                   | TATA-box binding protein associated factor 4b             | ENSG00000141384 | 1.213  | 6.20E-03 |
| <i>VGLL3</i>                   | vestigial like family member 3                            | ENSG00000206538 | 0.559  | 6.20E-04 |
| <i>CNIH3-AS2</i>               | CNIH3 antisense RNA 2                                     | ENSG00000233384 | -1.201 | 6.30E-03 |
| <i>PLXNB3</i>                  | plexin B3                                                 | ENSG00000198753 | 0.483  | 6.30E-03 |
| <i>MRPL32</i>                  | mitochondrial ribosomal protein L32                       | ENSG00000106591 | 0.438  | 6.40E-03 |
| <i>S100A13</i>                 | S100 calcium binding protein A13                          | ENSG00000189171 | -0.325 | 6.40E-03 |
| <i>ZNF337-AS1</i>              | ZNF337 antisense RNA 1                                    | ENSG00000213742 | -0.579 | 6.40E-03 |
| <i>RASSF8</i>                  | Ras association domain family member 8                    | ENSG00000123094 | 0.381  | 6.50E-03 |
| <i>ROBO4</i>                   | roundabout guidance receptor 4                            | ENSG00000154133 | -2.762 | 6.50E-03 |
| <i>LINC02603</i>               | long intergenic non-protein coding RNA 2603               | ENSG00000230262 | -4.042 | 6.50E-05 |
| <i>CIB2</i>                    | calcium and integrin binding family member 2              | ENSG00000136425 | -1.296 | 6.70E-04 |
| <i>KAT2B</i>                   | lysine acetyltransferase 2B                               | ENSG00000114166 | 0.496  | 6.80E-03 |
| <i>ZBTB43</i>                  | zinc finger and BTB domain containing 43                  | ENSG00000169155 | 0.563  | 6.80E-03 |
| <i>DIP2B</i>                   | disco interacting protein 2 homolog B                     | ENSG00000066084 | 0.285  | 6.90E-03 |
| <i>CPD</i>                     | carboxypeptidase D                                        | ENSG00000108582 | 0.270  | 7.00E-03 |
| <i>FBXW9</i>                   | F-box and WD repeat domain containing 9                   | ENSG00000132004 | 0.523  | 7.00E-03 |
| <i>MT-CYB</i>                  | cytochrome b                                              | ENSG00000198727 | -0.211 | 7.00E-03 |
| <i>PEX16</i>                   | peroxisomal biogenesis factor 16                          | ENSG00000121680 | 0.594  | 7.00E-03 |
| <i>ANO7</i>                    | anoctamin 7                                               | ENSG00000146205 | -1.356 | 7.10E-03 |
| <i>MT-ATP8</i>                 | ATP synthase F0 subunit 8                                 | ENSG00000228253 | -0.298 | 7.10E-03 |
| <i>TRIP6</i>                   | thyroid hormone receptor interactor 6                     | ENSG00000087077 | -0.320 | 7.10E-03 |
| <i>SCD</i>                     | stearoyl-CoA desaturase                                   | ENSG00000099194 | 0.219  | 7.20E-03 |
| <i>ZBTB3</i>                   | zinc finger and BTB domain containing 3                   | ENSG00000185670 | -1.068 | 7.20E-03 |

|                     |                                                        |                 |        |          |
|---------------------|--------------------------------------------------------|-----------------|--------|----------|
| <i>MAP4K3</i>       | mitogen-activated protein kinase kinase kinase 3       | ENSG00000011566 | 0.429  | 7.30E-03 |
| <i>TNFRSF10D</i>    | TNF receptor superfamily member 10d                    | ENSG00000173530 | -0.387 | 7.30E-03 |
| <i>PPP3CA</i>       | protein phosphatase 3 catalytic subunit alpha          | ENSG00000138814 | 0.273  | 7.40E-03 |
| <i>URI1</i>         | URI1 prefoldin like chaperone                          | ENSG00000105176 | 0.358  | 7.40E-03 |
| <i>LOC102723582</i> | uncharacterized LOC102723582                           | ENSG00000272758 | 0.421  | 7.50E-03 |
| <i>CCDC151</i>      | coiled-coil domain containing 151                      | ENSG00000198003 | -0.431 | 7.60E-03 |
| <i>CD2BP2-DT</i>    | CD2BP2 divergent transcript                            | ENSG00000260219 | 2.171  | 7.60E-03 |
| <i>CNBD2</i>        | cyclic nucleotide binding domain containing 2          | ENSG00000149646 | -1.585 | 7.60E-03 |
| <i>ESR1</i>         | estrogen receptor 1                                    | ENSG00000091831 | 2.171  | 7.60E-03 |
| <i>FGF22</i>        | fibroblast growth factor 22                            | ENSG00000070388 | 3.252  | 7.60E-03 |
| <i>HNRNPLP2</i>     | heterogeneous nuclear ribonucleoprotein L pseudogene 2 | ENSG00000259917 | 2.171  | 7.60E-03 |
| <i>LDHD</i>         | lactate dehydrogenase D                                | ENSG00000166816 | 3.252  | 7.60E-03 |
| <i>MORN2</i>        | MORN repeat containing 2                               | ENSG00000188010 | -0.735 | 7.60E-03 |
| <i>PPP1R32</i>      | protein phosphatase 1 regulatory subunit 32            | ENSG00000162148 | 3.252  | 7.60E-03 |
| <i>RPL34</i>        | ribosomal protein L34                                  | ENSG00000109475 | -0.240 | 7.60E-03 |
| <i>RP1_198K115</i>  |                                                        | ENSG00000275457 | 0.701  | 7.70E-03 |
| <i>ZNF585B</i>      | zinc finger protein 585B                               | ENSG00000245680 | 0.701  | 7.70E-03 |
| <i>ABI3BP</i>       | ABI family member 3 binding protein                    | ENSG00000154175 | -0.805 | 7.80E-03 |
| <i>JARID2</i>       | jumonji and AT-rich interaction domain containing 2    | ENSG00000008083 | 0.374  | 7.80E-03 |
| <i>PPHLN1</i>       | periphilin 1                                           | ENSG00000134283 | -0.328 | 7.80E-03 |
| <i>ITGB1-DT</i>     | ITGB1 divergent transcript                             | ENSG00000229656 | -2.188 | 7.90E-03 |
| <i>LHX1-DT</i>      | LHX1 divergent transcript                              | ENSG00000277268 | -2.188 | 7.90E-03 |
| <i>LINC01504</i>    | long intergenic non-protein coding RNA 1504            | ENSG00000225434 | -2.188 | 7.90E-03 |
| <i>LOC105375519</i> |                                                        | ENSG00000273297 | 2.581  | 7.90E-03 |
| <i>MCTS2P</i>       | MCTS family member 2, pseudogene                       | ENSG00000101898 | 2.581  | 7.90E-03 |
| <i>RP11_197N182</i> |                                                        | ENSG00000256028 | 2.581  | 7.90E-03 |
| <i>SEMA4A</i>       | semaphorin 4A                                          | ENSG00000196189 | 2.499  | 7.90E-03 |
| <i>TBC1D32</i>      | TBC1 domain family member 32                           | ENSG00000146350 | -0.941 | 7.90E-03 |
| <i>CENPV</i>        | centromere protein V                                   | ENSG00000166582 | 0.643  | 8.00E-03 |
| <i>RALB</i>         | RAS like proto-oncogene B                              | ENSG00000144118 | -0.319 | 8.00E-03 |
| <i>ZNRF2</i>        | zinc and ring finger 2                                 | ENSG00000180233 | 0.484  | 8.00E-03 |
| <i>COPS7B</i>       | COP9 signalosome subunit 7B                            | ENSG00000144524 | -0.510 | 8.10E-04 |
| <i>RP11_159D122</i> |                                                        | ENSG00000264112 | -0.768 | 8.20E-03 |
| <i>RUNX2</i>        | RUNX family transcription factor 2                     | ENSG00000124813 | 0.411  | 8.20E-03 |
| <i>C3orf33</i>      | chromosome 3 open reading frame 33                     | ENSG00000174928 | 1.460  | 8.30E-03 |
| <i>CES3</i>         | carboxylesterase 3                                     | ENSG00000172828 | 1.081  | 8.30E-03 |
| <i>GDPGP1</i>       | GDP-D-glucose phosphorylase 1                          | ENSG00000183208 | -0.365 | 8.30E-03 |
| <i>ZNF688</i>       | zinc finger protein 688                                | ENSG00000229809 | 0.546  | 8.30E-03 |
| <i>AC1425281</i>    |                                                        | ENSG00000235078 | -0.403 | 8.40E-03 |
| <i>CD82</i>         | CD82 molecule                                          | ENSG00000085117 | -0.251 | 8.40E-03 |
| <i>PIMREG</i>       | PICALM interacting mitotic regulator                   | ENSG00000129195 | -0.362 | 8.40E-03 |
| <i>TTF1</i>         | transcription termination factor 1                     | ENSG00000125482 | -0.508 | 8.40E-03 |
| <i>BDNF-AS</i>      | BDNF antisense RNA                                     | ENSG00000245573 | -0.752 | 8.40E-04 |
| <i>RPUSD4</i>       | RNA pseudouridine synthase D4                          | ENSG00000165526 | -0.481 | 8.60E-03 |
| <i>TPTEP2</i>       | TPTE pseudogene 2                                      | ENSG00000244627 | 1.956  | 8.60E-04 |
| <i>IQCD</i>         | IQ motif containing D                                  | ENSG00000166578 | 1.829  | 8.70E-03 |

|                     |                                                                  |                 |        |          |
|---------------------|------------------------------------------------------------------|-----------------|--------|----------|
| <i>TRIM23</i>       | tripartite motif containing 23                                   | ENSG00000113595 | 0.540  | 8.70E-03 |
| <i>SEC14L1</i>      | SEC14 like lipid binding 1                                       | ENSG00000129657 | 0.278  | 8.80E-03 |
| <i>JADE3</i>        | jade family PHD finger 3                                         | ENSG00000102221 | -0.467 | 8.90E-03 |
| <i>RP11_205M53</i>  |                                                                  | ENSG00000280064 | 0.809  | 9.10E-03 |
| <i>ABCF3</i>        | ATP binding cassette subfamily F member 3                        | ENSG00000161204 | -0.339 | 9.20E-03 |
| <i>GALNT18</i>      | polypeptide N-acetylgalactosaminyltransferase 18                 | ENSG00000110328 | -0.541 | 9.20E-03 |
| <i>UTP14A</i>       | UTP14A small subunit processome component                        | ENSG00000156697 | -0.439 | 9.30E-03 |
| <i>DPY19L4</i>      | dpy-19 like 4                                                    | ENSG00000156162 | 0.362  | 9.40E-03 |
| <i>MYO1D</i>        | myosin ID                                                        | ENSG00000176658 | 0.746  | 9.40E-03 |
| <i>LRFN4</i>        | leucine rich repeat and fibronectin type III domain containing 4 | ENSG00000173621 | 0.445  | 9.40E-04 |
| <i>MROH8</i>        | maestro heat like repeat family member 8                         | ENSG00000101353 | -0.346 | 9.50E-03 |
| <i>PRRT3</i>        | proline rich transmembrane protein 3                             | ENSG00000163704 | 0.640  | 9.50E-03 |
| <i>TP53I11</i>      | tumor protein p53 inducible protein 11                           | ENSG00000175274 | 0.357  | 9.50E-03 |
| <i>ZBTB39</i>       | zinc finger and BTB domain containing 39                         | ENSG00000166860 | 0.596  | 9.50E-03 |
| <i>BNC2</i>         | basonuclin 2                                                     | ENSG00000173068 | 0.382  | 9.60E-03 |
| <i>CWC27</i>        | CWC27 spliceosome associated cyclophilin                         | ENSG00000153015 | -0.417 | 9.60E-03 |
| <i>LA16C_390E64</i> |                                                                  | ENSG00000260051 | 1.527  | 9.70E-04 |
| <i>SNAP29</i>       | synaptosome associated protein 29                                | ENSG00000099940 | 0.449  | 9.80E-03 |
| <i>EDN1</i>         | endothelin 1                                                     | ENSG00000078401 | 1.114  | 9.90E-03 |
| <i>MRPL41</i>       | mitochondrial ribosomal protein L41                              | ENSG00000182154 | -0.309 | 9.90E-03 |
| <i>SMG1P2</i>       | SMG1 pseudogene 2                                                | ENSG00000205534 | -1.598 | 9.90E-03 |
| <i>CRACR2B</i>      | calcium release activated channel regulator 2B                   | ENSG00000177685 | 2.432  | 9.90E-04 |

**Table S2.** List of DEGs in FSK treatment (FC = 0, adjusted *p*-value ≤ 0.05).

| <i>Symbol</i>    | <i>Entrez Gene Name</i>                                   | <i>ENSEMBL</i>  | <i>Expr Log Ratio</i> | <i>Expr p-Value</i> |
|------------------|-----------------------------------------------------------|-----------------|-----------------------|---------------------|
| <i>A4GALT</i>    | alpha 1,4-galactosyltransferase (P blood group)           | ENSG00000128274 | 1.561                 | 7.10E-04            |
| <i>AASS</i>      | aminoadipate-semialdehyde synthase                        | ENSG00000008311 | 0.942                 | 3.40E-02            |
| <i>ABCA13</i>    | ATP binding cassette subfamily A member 13                | ENSG00000179869 | 2.148                 | 3.90E-03            |
| <i>ABCA8</i>     | ATP binding cassette subfamily A member 8                 | ENSG00000141338 | 1.503                 | 7.20E-04            |
| <i>ABCC4</i>     | ATP binding cassette subfamily C member 4                 | ENSG00000125257 | 1.291                 | 1.40E-03            |
| <i>ABL1</i>      | ABL proto-oncogene 1, non-receptor tyrosine kinase        | ENSG00000097007 | 0.778                 | 4.90E-02            |
| <i>AC0053392</i> |                                                           | ENSG00000268565 | -1.170                | 3.30E-02            |
| <i>AC0075635</i> |                                                           | ENSG00000236886 | 1.080                 | 6.40E-03            |
| <i>AC0107616</i> |                                                           | ENSG00000265073 | 2.034                 | 1.60E-02            |
| <i>AC0374451</i> |                                                           | ENSG00000233635 | 1.696                 | 1.50E-02            |
| <i>AC0695134</i> |                                                           | ENSG00000229178 | -3.453                | 2.00E-02            |
| <i>AC1147308</i> |                                                           | ENSG00000215692 | 1.008                 | 4.50E-02            |
| <i>ACBD4</i>     | acyl-CoA binding domain containing 4                      | ENSG00000181513 | 0.962                 | 3.70E-02            |
| <i>ACE</i>       | angiotensin I converting enzyme                           | ENSG00000159640 | 2.004                 | 4.20E-02            |
| <i>ACHE</i>      | acetylcholinesterase (Cartwright blood group)             | ENSG00000087085 | -3.603                | 1.30E-02            |
| <i>ACTG2</i>     | actin gamma 2, smooth muscle                              | ENSG00000163017 | -1.011                | 2.20E-02            |
| <i>ADAMTS15</i>  | ADAM metallopeptidase with thrombospondin type 1 motif 15 | ENSG00000166106 | 0.964                 | 1.90E-02            |
| <i>ADAMTS7</i>   | ADAM metallopeptidase with thrombospondin type 1 motif 7  | ENSG00000136378 | -0.873                | 2.90E-02            |
| <i>ADAMTSL3</i>  | ADAMTS like 3                                             | ENSG00000156218 | 1.743                 | 1.80E-02            |
| <i>ADCY1</i>     | adenylate cyclase 1                                       | ENSG00000164742 | -2.520                | 7.10E-03            |
| <i>ADCY3</i>     | adenylate cyclase 3                                       | ENSG00000138031 | -0.976                | 1.80E-02            |
| <i>ADGRG1</i>    | adhesion G protein-coupled receptor G1                    | ENSG00000205336 | -1.135                | 1.40E-02            |
| <i>ADSS1</i>     | adenylosuccinate synthase 1                               | ENSG00000185100 | 3.315                 | 4.80E-03            |
| <i>AFAP1L2</i>   | actin filament associated protein 1 like 2                | ENSG00000169129 | -1.354                | 1.60E-02            |
| <i>AFF3</i>      | AF4/FMR2 family member 3                                  | ENSG00000144218 | -1.598                | 7.70E-03            |
| <i>AHI1</i>      | Abelson helper integration site 1                         | ENSG00000135541 | 1.261                 | 2.60E-03            |
| <i>ALDH1A1</i>   | aldehyde dehydrogenase 1 family member A1                 | ENSG00000165092 | 1.503                 | 1.30E-02            |
| <i>ALDH1A3</i>   | aldehyde dehydrogenase 1 family member A3                 | ENSG00000184254 | -1.076                | 9.70E-03            |
| <i>ALDH1L2</i>   | aldehyde dehydrogenase 1 family member L2                 | ENSG00000136010 | -0.889                | 3.70E-02            |
| <i>ALDH3B1</i>   | aldehyde dehydrogenase 3 family member B1                 | ENSG00000006534 | 0.968                 | 1.80E-02            |
| <i>ALPL</i>      | alkaline phosphatase, biomineralization associated        | ENSG00000162551 | 2.153                 | 8.50E-03            |
| <i>AMDHD1</i>    | amidohydrolase domain containing 1                        | ENSG00000139344 | 2.737                 | 3.30E-02            |
| <i>AMPD3</i>     | adenosine monophosphate deaminase 3                       | ENSG00000133805 | -0.992                | 2.60E-02            |
| <i>ANGPT1</i>    | angiopoietin 1                                            | ENSG00000154188 | 1.770                 | 1.10E-04            |
| <i>ANGPTL2</i>   | angiopoietin like 2                                       | ENSG00000136859 | 1.085                 | 1.30E-02            |
| <i>ANGPTL4</i>   | angiopoietin like 4                                       | ENSG00000167772 | -1.605                | 4.30E-04            |



|                     |                                                                 |                 |        |          |
|---------------------|-----------------------------------------------------------------|-----------------|--------|----------|
| <i>ANKRD34A</i>     | ankyrin repeat domain 34A                                       | ENSG00000272031 | 1.842  | 1.00E-02 |
| <i>ANLN</i>         | anillin actin binding protein                                   | ENSG00000011426 | -1.582 | 9.20E-05 |
| <i>ANO7</i>         | anoctamin 7                                                     | ENSG00000146205 | -3.060 | 1.20E-04 |
| <i>ANTXR1</i>       | ANTXR cell adhesion molecule 1                                  | ENSG00000169604 | 1.620  | 5.00E-05 |
| <i>AP1S3</i>        | adaptor related protein complex 1 subunit sigma 3               | ENSG00000152056 | 1.043  | 2.30E-02 |
| <i>AP3M2</i>        | adaptor related protein complex 3 subunit mu 2                  | ENSG00000070718 | -0.938 | 3.30E-02 |
| <i>APCDD1L</i>      | APC down-regulated 1 like                                       | ENSG00000198768 | -1.692 | 2.00E-04 |
| <i>APCDD1L-DT</i>   | APCDD1L divergent transcript                                    | ENSG00000231290 | -1.518 | 3.10E-02 |
| <i>APOA1</i>        | apolipoprotein A1                                               | ENSG00000118137 | -2.698 | 1.30E-02 |
| <i>APOE</i>         | apolipoprotein E                                                | ENSG00000130203 | -1.521 | 3.00E-03 |
| <i>AQP2</i>         | aquaporin 2                                                     | ENSG00000167580 | 7.381  | 1.60E-05 |
| <i>ARHGAP11A</i>    | Rho GTPase activating protein 11A                               | ENSG00000198826 | -1.212 | 3.40E-03 |
| <i>ARHGAP19</i>     | Rho GTPase activating protein 19                                | ENSG00000213390 | -1.044 | 3.50E-02 |
| <i>ARHGDIB</i>      | Rho GDP dissociation inhibitor beta                             | ENSG00000111348 | -1.197 | 6.70E-03 |
| <i>ARHGEF19</i>     | Rho guanine nucleotide exchange factor 19                       | ENSG00000142632 | 0.905  | 2.70E-02 |
| <i>ARHGEF19-AS1</i> | ARHGEF19 antisense RNA 1                                        | ENSG00000234166 | 1.362  | 1.20E-02 |
| <i>ARHGEF34P</i>    | Rho guanine nucleotide exchange factor 34, pseudogene           | ENSG00000204959 | 1.487  | 2.90E-02 |
| <i>ARNTL2-AS1</i>   | ARNTL2 antisense RNA 1                                          | ENSG00000245311 | -1.400 | 3.60E-02 |
| <i>ARRDC3</i>       | arrestin domain containing 3                                    | ENSG00000113369 | 1.275  | 1.90E-03 |
| <i>ARSB</i>         | arylsulfatase B                                                 | ENSG00000113273 | 0.797  | 5.00E-02 |
| <i>ARSD-AS1</i>     | ARSD antisense RNA 1                                            | ENSG00000229851 | 0.870  | 4.20E-02 |
| <i>ASF1B</i>        | anti-silencing function 1B histone chaperone                    | ENSG00000105011 | -1.570 | 1.70E-04 |
| <i>ASNS</i>         | asparagine synthetase (glutamine-hydrolyzing)                   | ENSG00000070669 | -1.018 | 1.70E-02 |
| <i>ASPM</i>         | abnormal spindle microtubule assembly                           | ENSG00000066279 | -1.467 | 3.20E-04 |
| <i>ASRGL1</i>       | asparaginase and isoaspartyl peptidase 1                        | ENSG00000162174 | -1.239 | 4.00E-02 |
| <i>ATAD2</i>        | ATPase family AAA domain containing 2                           | ENSG00000156802 | -1.056 | 1.10E-02 |
| <i>ATP23</i>        | ATP23 metallopeptidase and ATP synthase assembly factor homolog | ENSG00000166896 | -1.883 | 4.10E-02 |
| <i>ATP2A1-AS1</i>   | ATP2A1 antisense RNA 1                                          | ENSG00000260442 | -2.015 | 2.10E-02 |
| <i>ATP8B4</i>       | ATPase phospholipid transporting 8B4 (putative)                 | ENSG00000104043 | 3.330  | 4.80E-04 |
| <i>AURKA</i>        | aurora kinase A                                                 | ENSG00000087586 | -1.284 | 2.20E-03 |
| <i>AURKB</i>        | aurora kinase B                                                 | ENSG00000178999 | -1.592 | 2.50E-04 |
| <i>AVPI1</i>        | arginine vasopressin induced 1                                  | ENSG00000119986 | 2.031  | 4.70E-06 |
| <i>BAG1</i>         | BCL2 associated athanogene 1                                    | ENSG00000107262 | 0.851  | 3.50E-02 |
| <i>BARD1</i>        | BRCA1 associated RING domain 1                                  | ENSG00000138376 | -1.307 | 5.70E-03 |
| <i>BCAR3</i>        | BCAR3 adaptor protein, NSP family member                        | ENSG00000137936 | -0.802 | 4.90E-02 |
| <i>BCL2</i>         | BCL2 apoptosis regulator                                        | ENSG00000171791 | -2.168 | 8.10E-04 |
| <i>BCL2L11</i>      | BCL2 like 11                                                    | ENSG00000153094 | 0.901  | 3.20E-02 |
| <i>BCYRN1</i>       | brain cytoplasmic RNA 1                                         | ENSG00000236824 | -1.329 | 2.60E-03 |
| <i>BDNF</i>         | brain derived neurotrophic factor                               | ENSG00000176697 | 1.342  | 1.10E-03 |
| <i>BDNF-AS</i>      | BDNF antisense RNA                                              | ENSG00000245573 | 0.860  | 4.60E-02 |
| <i>BEX2</i>         | brain expressed X-linked 2                                      | ENSG00000133134 | 2.280  | 2.20E-03 |
| <i>BIRC5</i>        | baculoviral IAP repeat containing 5                             | ENSG00000089685 | -1.547 | 1.70E-04 |
| <i>BLM</i>          | BLM RecQ like helicase                                          | ENSG00000197299 | -1.457 | 4.50E-03 |
| <i>BMP3</i>         | bone morphogenetic protein 3                                    | ENSG00000152785 | 2.564  | 1.90E-02 |

|                  |                                                                  |                 |        |          |
|------------------|------------------------------------------------------------------|-----------------|--------|----------|
| <i>BOLA3-AS1</i> | BOLA3 divergent transcript                                       | ENSG00000225439 | 1.571  | 2.40E-02 |
| <i>BRCA1</i>     | BRCA1 DNA repair associated                                      | ENSG00000012048 | -1.447 | 8.10E-04 |
| <i>BRIP1</i>     | BRCA1 interacting protein C-terminal<br>helicase 1               | ENSG00000136492 | -1.107 | 1.40E-02 |
| <i>BUB1</i>      | BUB1 mitotic checkpoint serine/threonine<br>kinase               | ENSG00000169679 | -1.080 | 8.40E-03 |
| <i>BUB1B</i>     | BUB1 mitotic checkpoint serine/threonine<br>kinase B             | ENSG00000156970 | -1.945 | 7.40E-06 |
| <i>C10orf25</i>  | chromosome 10 open reading frame 25                              | ENSG00000165511 | 3.407  | 3.00E-03 |
| <i>C10orf55</i>  | chromosome 10 open reading frame 55                              | ENSG00000222047 | -1.059 | 8.60E-03 |
| <i>C11orf71</i>  | chromosome 11 open reading frame 71                              | ENSG00000180425 | 1.696  | 1.50E-02 |
| <i>C11orf96</i>  | chromosome 11 open reading frame 96                              | ENSG00000187479 | 3.029  | 1.30E-10 |
| <i>C12orf60</i>  | chromosome 12 open reading frame 60                              | ENSG00000182993 | -0.789 | 5.00E-02 |
| <i>C17orf107</i> | chromosome 17 open reading frame 107                             | ENSG00000205710 | 2.873  | 2.00E-02 |
| <i>C17orf53</i>  | chromosome 17 open reading frame 53                              | ENSG00000125319 | -1.385 | 1.30E-02 |
| <i>C1QL4</i>     | complement C1q like 4                                            | ENSG00000186897 | -1.759 | 4.20E-02 |
| <i>C1QTNF7</i>   | C1q and TNF related 7                                            | ENSG00000163145 | 1.151  | 2.00E-02 |
| <i>C1RL</i>      | complement C1r subcomponent like                                 | ENSG00000139178 | 0.895  | 2.80E-02 |
| <i>C2orf81</i>   | chromosome 2 open reading frame 81                               | ENSG00000159239 | 1.136  | 2.20E-02 |
| <i>C4orf46</i>   | chromosome 4 open reading frame 46                               | ENSG00000205208 | -1.282 | 4.70E-03 |
| <i>C7orf57</i>   | chromosome 7 open reading frame 57                               | ENSG00000164746 | 1.903  | 3.10E-02 |
| <i>C9orf131</i>  | chromosome 9 open reading frame 131                              | ENSG00000174038 | 2.737  | 3.30E-02 |
| <i>CA9</i>       | carbonic anhydrase 9                                             | ENSG00000107159 | 2.079  | 1.40E-03 |
| <i>CABLES1</i>   | Cdk5 and Abl enzyme substrate 1                                  | ENSG00000134508 | 1.071  | 1.30E-02 |
| <i>CACNA2D2</i>  | calcium voltage-gated channel auxiliary<br>subunit alpha2delta 2 | ENSG00000007402 | 3.576  | 4.70E-03 |
| <i>CADM1</i>     | cell adhesion molecule 1                                         | ENSG00000182985 | 1.461  | 4.60E-04 |
| <i>CALB2</i>     | calbindin 2                                                      | ENSG00000172137 | 2.034  | 2.00E-06 |
| <i>CARD10</i>    | caspase recruitment domain family mem-<br>ber 10                 | ENSG00000100065 | -1.129 | 1.00E-02 |
| <i>CARD11</i>    | caspase recruitment domain family mem-<br>ber 11                 | ENSG00000198286 | -1.068 | 1.10E-02 |
| <i>CARD16</i>    | caspase recruitment domain family mem-<br>ber 16                 | ENSG00000204397 | 0.808  | 4.80E-02 |
| <i>CARNS1</i>    | carnosine synthase 1                                             | ENSG00000172508 | 3.087  | 1.30E-09 |
| <i>CASC2</i>     | cancer susceptibility 2                                          | ENSG00000177640 | 1.211  | 4.30E-02 |
| <i>CBR3-AS1</i>  | CBR3 antisense RNA 1                                             | ENSG00000236830 | -0.925 | 4.40E-02 |
| <i>CC2D2B</i>    | coiled-coil and C2 domain containing 2B                          | ENSG00000188649 | -2.008 | 2.80E-02 |
| <i>CCBE1</i>     | collagen and calcium binding EGF do-<br>mains 1                  | ENSG00000183287 | -1.130 | 3.30E-02 |
| <i>CCDC114</i>   | coiled-coil domain containing 114                                | ENSG00000105479 | 1.487  | 2.90E-02 |
| <i>CCDC120</i>   | coiled-coil domain containing 120                                | ENSG00000147144 | 1.081  | 2.70E-02 |
| <i>CCDC138</i>   | coiled-coil domain containing 138                                | ENSG00000163006 | -1.519 | 5.70E-03 |
| <i>CCDC34</i>    | coiled-coil domain containing 34                                 | ENSG00000109881 | -0.910 | 4.10E-02 |
| <i>CCDC85B</i>   | coiled-coil domain containing 85B                                | ENSG00000175602 | -0.808 | 4.10E-02 |
| <i>CCN3</i>      | cellular communication network factor 3                          | ENSG00000136999 | 1.415  | 1.00E-02 |
| <i>CCNA2</i>     | cyclin A2                                                        | ENSG00000145386 | -0.939 | 2.10E-02 |
| <i>CCNB1</i>     | cyclin B1                                                        | ENSG00000134057 | -1.599 | 1.00E-04 |
| <i>CCNB2</i>     | cyclin B2                                                        | ENSG00000157456 | -1.478 | 5.80E-04 |
| <i>CCNE1</i>     | cyclin E1                                                        | ENSG00000105173 | -1.010 | 3.10E-02 |
| <i>CCNF</i>      | cyclin F                                                         | ENSG00000162063 | -1.106 | 8.30E-03 |
| <i>CCP110</i>    | centriolar coiled-coil protein 110                               | ENSG00000103540 | -0.833 | 5.00E-02 |
| <i>CD200</i>     | CD200 molecule                                                   | ENSG00000091972 | 1.146  | 4.80E-03 |

|                  |                                                            |                 |        |          |
|------------------|------------------------------------------------------------|-----------------|--------|----------|
| <i>CD2BP2-DT</i> | CD2BP2 divergent transcript                                | ENSG00000260219 | 2.163  | 2.10E-02 |
| <i>CD55</i>      | CD55 molecule (Cromer blood group)                         | ENSG00000196352 | 1.707  | 2.20E-05 |
| <i>CD74</i>      | CD74 molecule                                              | ENSG00000019582 | 1.101  | 5.90E-03 |
| <i>CD9</i>       | CD9 molecule                                               | ENSG00000010278 | -1.010 | 1.10E-02 |
| <i>CDC20</i>     | cell division cycle 20                                     | ENSG00000117399 | -1.696 | 4.10E-05 |
| <i>CDC42EP2</i>  | CDC42 effector protein 2                                   | ENSG00000149798 | -1.030 | 2.10E-02 |
| <i>CDC45</i>     | cell division cycle 45                                     | ENSG00000093009 | -2.088 | 1.10E-05 |
| <i>CDC6</i>      | cell division cycle 6                                      | ENSG00000094804 | -1.370 | 1.40E-03 |
| <i>CDCA2</i>     | cell division cycle associated 2                           | ENSG00000184661 | -1.749 | 1.00E-04 |
| <i>CDCA3</i>     | cell division cycle associated 3                           | ENSG00000111665 | -0.969 | 2.60E-02 |
| <i>CDCA4</i>     | cell division cycle associated 4                           | ENSG00000170779 | -1.355 | 1.30E-03 |
| <i>CDCA5</i>     | cell division cycle associated 5                           | ENSG00000146670 | -1.298 | 1.90E-03 |
| <i>CDCA7</i>     | cell division cycle associated 7                           | ENSG00000144354 | -1.249 | 8.20E-03 |
| <i>CDCA8</i>     | cell division cycle associated 8                           | ENSG00000134690 | -1.752 | 8.30E-05 |
| <i>CDH11</i>     | cadherin 11                                                | ENSG00000140937 | 1.014  | 1.00E-02 |
| <i>CDK1</i>      | cyclin dependent kinase 1                                  | ENSG00000170312 | -1.310 | 1.50E-03 |
| <i>CDKN2C</i>    | cyclin dependent kinase inhibitor 2C                       | ENSG00000123080 | -1.196 | 4.20E-03 |
| <i>CDKN3</i>     | cyclin dependent kinase inhibitor 3                        | ENSG00000100526 | -1.518 | 6.60E-04 |
| <i>CDT1</i>      | chromatin licensing and DNA replication factor 1           | ENSG00000167513 | -1.011 | 2.10E-02 |
| <i>CEBPD</i>     | CCAAT enhancer binding protein delta                       | ENSG00000221869 | 1.583  | 1.20E-04 |
| <i>CELF2</i>     | CUGBP Elav-like family member 2                            | ENSG00000048740 | 1.075  | 3.00E-02 |
| <i>CENPA</i>     | centromere protein A                                       | ENSG00000115163 | -1.621 | 7.00E-04 |
| <i>CENPE</i>     | centromere protein E                                       | ENSG00000138778 | -1.470 | 5.20E-04 |
| <i>CENPF</i>     | centromere protein F                                       | ENSG00000117724 | -1.674 | 3.90E-05 |
| <i>CENPH</i>     | centromere protein H                                       | ENSG00000153044 | -0.982 | 3.70E-02 |
| <i>CENPI</i>     | centromere protein I                                       | ENSG00000102384 | -1.772 | 2.80E-04 |
| <i>CENPJ</i>     | centromere protein J                                       | ENSG00000151849 | -1.096 | 1.70E-02 |
| <i>CENPK</i>     | centromere protein K                                       | ENSG00000123219 | -1.651 | 4.40E-04 |
| <i>CENPL</i>     | centromere protein L                                       | ENSG00000120334 | -1.124 | 1.50E-02 |
| <i>CENPM</i>     | centromere protein M                                       | ENSG00000100162 | -1.123 | 2.10E-02 |
| <i>CENPU</i>     | centromere protein U                                       | ENSG00000151725 | -1.425 | 1.00E-03 |
| <i>CENPW</i>     | centromere protein W                                       | ENSG00000203760 | -1.934 | 6.90E-05 |
| <i>CENPX</i>     | centromere protein X                                       | ENSG00000169689 | -1.203 | 4.30E-03 |
| <i>CEP128</i>    | centrosomal protein 128                                    | ENSG00000100629 | -1.610 | 2.90E-03 |
| <i>CEP152</i>    | centrosomal protein 152                                    | ENSG00000103995 | -1.087 | 2.70E-02 |
| <i>CEP55</i>     | centrosomal protein 55                                     | ENSG00000138180 | -1.735 | 5.10E-05 |
| <i>CEP78</i>     | centrosomal protein 78                                     | ENSG00000148019 | -0.946 | 2.50E-02 |
| <i>CEP83</i>     | centrosomal protein 83                                     | ENSG00000173588 | -1.264 | 2.10E-02 |
| <i>CEP85</i>     | centrosomal protein 85                                     | ENSG00000130695 | -0.867 | 4.50E-02 |
| <i>CFH</i>       | complement factor H                                        | ENSG00000000971 | 1.328  | 1.10E-03 |
| <i>CHAC1</i>     | ChaC glutathione specific gamma-glutamylcyclotransferase 1 | ENSG00000128965 | -1.644 | 6.00E-04 |
| <i>CHAF1A</i>    | chromatin assembly factor 1 subunit A                      | ENSG00000167670 | -0.982 | 1.70E-02 |
| <i>CHGB</i>      | chromogranin B                                             | ENSG00000089199 | 1.673  | 6.10E-03 |
| <i>CHL1</i>      | cell adhesion molecule L1 like                             | ENSG00000134121 | 1.896  | 7.20E-06 |
| <i>CHL1-AS1</i>  | CHL1 antisense RNA 1                                       | ENSG00000234661 | 1.425  | 1.60E-02 |
| <i>CHL1-AS2</i>  | CHL1 antisense RNA 2                                       | ENSG00000224318 | 1.971  | 2.00E-03 |
| <i>CHMP1B</i>    | charged multivesicular body protein 1B                     | ENSG00000255112 | 0.814  | 4.40E-02 |
| <i>CHRM2</i>     | cholinergic receptor muscarinic 2                          | ENSG00000181072 | 1.761  | 4.20E-03 |
| <i>CHST1</i>     | carbohydrate sulfotransferase 1                            | ENSG00000175264 | -1.611 | 4.10E-04 |
| <i>CHTF18</i>    | chromosome transmission fidelity factor 18                 | ENSG00000127586 | -0.904 | 2.70E-02 |

|                      |                                                                   |                 |        |          |
|----------------------|-------------------------------------------------------------------|-----------------|--------|----------|
| <i>CIB2</i>          | calcium and integrin binding family member 2                      | ENSG00000136425 | -1.902 | 1.20E-03 |
| <i>CIP2A</i>         | cell proliferation regulating inhibitor of protein phosphatase 2A | ENSG00000163507 | -1.388 | 1.60E-03 |
| <i>CIT</i>           | citron rho-interacting serine/threonine kinase                    | ENSG00000122966 | -1.538 | 2.80E-04 |
| <i>CKAP2</i>         | cytoskeleton associated protein 2                                 | ENSG00000136108 | -1.009 | 1.40E-02 |
| <i>CKAP2L</i>        | cytoskeleton associated protein 2 like                            | ENSG00000169607 | -1.766 | 4.80E-05 |
| <i>CKS1B</i>         | CDC28 protein kinase regulatory subunit 1B                        | ENSG00000173207 | -1.290 | 2.00E-03 |
| <i>CKS2</i>          | CDC28 protein kinase regulatory subunit 2                         | ENSG00000123975 | -1.418 | 6.60E-04 |
| <i>CLSPN</i>         | claspin                                                           | ENSG00000092853 | -1.244 | 4.30E-03 |
| <i>CMSS1</i>         | cms1 ribosomal small subunit homolog                              | ENSG00000184220 | -0.920 | 3.60E-02 |
| <i>CNBD2</i>         | cyclic nucleotide binding domain containing 2                     | ENSG00000149646 | -1.383 | 4.90E-02 |
| <i>CNIH3-AS2</i>     | CNIH3 antisense RNA 2                                             | ENSG00000233384 | -1.453 | 1.50E-02 |
| <i>CNTN5</i>         | contactin 5                                                       | ENSG00000149972 | 1.104  | 1.70E-02 |
| <i>CNTRL</i>         | centriolin                                                        | ENSG00000119397 | -1.019 | 2.30E-02 |
| <i>COL13A1</i>       | collagen type XIII alpha 1 chain                                  | ENSG00000197467 | -1.838 | 6.10E-04 |
| <i>COL4A5</i>        | collagen type IV alpha 5 chain                                    | ENSG00000188153 | 0.971  | 1.60E-02 |
| <i>COL4A6</i>        | collagen type IV alpha 6 chain                                    | ENSG00000197565 | 1.181  | 4.70E-03 |
| <i>COL6A3</i>        | collagen type VI alpha 3 chain                                    | ENSG00000163359 | -1.444 | 6.60E-04 |
| <i>COL8A2</i>        | collagen type VIII alpha 2 chain                                  | ENSG00000171812 | -1.851 | 3.10E-02 |
| <i>CORO2B</i>        | coronin 2B                                                        | ENSG00000103647 | -1.438 | 1.40E-03 |
| <i>CPE</i>           | carboxypeptidase E                                                | ENSG00000109472 | 0.941  | 1.70E-02 |
| <i>CPEB4</i>         | cytoplasmic polyadenylation element binding protein 4             | ENSG00000113742 | 1.651  | 6.30E-05 |
| <i>CRACR2B</i>       | calcium release activated channel regulator 2B                    | ENSG00000177685 | 2.004  | 4.20E-02 |
| <i>CREG1</i>         | cellular repressor of E1A stimulated genes 1                      | ENSG00000143162 | 0.992  | 1.60E-02 |
| <i>CRISPLD2</i>      | cysteine rich secretory protein LCCL domain containing 2          | ENSG00000103196 | 1.096  | 2.20E-02 |
| <i>CRYBB2P1</i>      | crystallin beta B2 pseudogene 1                                   | ENSG00000100058 | -1.109 | 3.60E-02 |
| <i>CSGALNACT1</i>    | chondroitin sulfate N-acetylgalactosaminyltransferase 1           | ENSG00000147408 | 2.703  | 3.30E-08 |
| <i>CSPG4</i>         | chondroitin sulfate proteoglycan 4                                | ENSG00000173546 | -1.327 | 4.40E-03 |
| <i>CSRP2</i>         | cysteine and glycine rich protein 2                               | ENSG00000175183 | -1.099 | 1.60E-02 |
| <i>CTA_243E71</i>    |                                                                   | ENSG00000279110 | -1.759 | 4.20E-02 |
| <i>CTB_193M125</i>   |                                                                   | ENSG00000280206 | -1.322 | 1.20E-02 |
| <i>CTB_58E171</i>    |                                                                   | ENSG00000277969 | 1.716  | 1.80E-02 |
| <i>CTC_453G235</i>   |                                                                   | ENSG00000269534 | -1.367 | 8.10E-03 |
| <i>CTC_463A161</i>   |                                                                   | ENSG00000280047 | 2.997  | 2.00E-02 |
| <i>CTD-2201I18.1</i> | uncharacterized LOC101929215                                      | ENSG00000249825 | 6.130  | 6.90E-03 |
| <i>CTD_2006M222</i>  |                                                                   | ENSG00000278934 | 1.834  | 4.20E-02 |
| <i>CTD_2017F171</i>  |                                                                   | ENSG00000275332 | 2.478  | 2.80E-02 |
| <i>CTD_2105E1314</i> |                                                                   | ENSG00000268729 | 2.264  | 6.20E-03 |
| <i>CTD_2196E143</i>  |                                                                   | ENSG00000261723 | -1.721 | 3.10E-02 |
| <i>CTD_2196E145</i>  |                                                                   | ENSG00000261266 | -1.808 | 1.50E-04 |
| <i>CTD_2228K21</i>   |                                                                   | ENSG00000250645 | -2.145 | 3.90E-02 |
| <i>CTD_2311M213</i>  |                                                                   | ENSG00000261821 | 2.101  | 4.30E-06 |
| <i>CTD_2510F54</i>   |                                                                   | ENSG00000265415 | -1.248 | 2.40E-02 |

|                     |                                                     |                 |        |          |
|---------------------|-----------------------------------------------------|-----------------|--------|----------|
| <i>CTD_2544N143</i> |                                                     | ENSG00000253645 | 1.685  | 2.50E-04 |
| <i>CTD_3203P23</i>  |                                                     | ENSG00000274092 | 1.201  | 2.50E-02 |
| <i>CTNNA2</i>       | catenin alpha 2                                     | ENSG00000066032 | 2.362  | 1.20E-03 |
| <i>CTSW</i>         | cathepsin W                                         | ENSG00000172543 | -1.916 | 3.00E-02 |
| <i>CYP11A1</i>      | cytochrome P450 family 11 subfamily A member 1      | ENSG00000140459 | 2.252  | 8.50E-08 |
| <i>CYP19A1</i>      | cytochrome P450 family 19 subfamily A member 1      | ENSG00000137869 | 3.196  | 3.50E-13 |
| <i>DACT1</i>        | dishevelled binding antagonist of beta catenin 1    | ENSG00000165617 | 0.804  | 4.50E-02 |
| <i>DAW1</i>         | dynein assembly factor with WD repeats 1            | ENSG00000123977 | 4.260  | 1.30E-04 |
| <i>DBF4</i>         | DBF4 zinc finger                                    | ENSG00000006634 | -1.245 | 1.30E-02 |
| <i>DBF4B</i>        | DBF4 zinc finger B                                  | ENSG00000161692 | -1.085 | 2.10E-02 |
| <i>DCLK1</i>        | doublecortin like kinase 1                          | ENSG00000133083 | 1.036  | 3.00E-02 |
| <i>DCLRE1B</i>      | DNA cross-link repair 1B                            | ENSG00000118655 | -0.984 | 3.10E-02 |
| <i>DCN</i>          | decorin                                             | ENSG00000011465 | 2.797  | 9.00E-03 |
| <i>DDIAS</i>        | DNA damage induced apoptosis suppressor             | ENSG00000165490 | -1.373 | 5.70E-03 |
| <i>DDX11</i>        | DEAD/H-box helicase 11                              | ENSG00000013573 | -1.158 | 6.80E-03 |
| <i>DEK</i>          | DEK proto-oncogene                                  | ENSG00000124795 | -0.807 | 4.20E-02 |
| <i>DENND5B</i>      | DENN domain containing 5B                           | ENSG00000170456 | 1.058  | 1.20E-02 |
| <i>DEPDC1</i>       | DEP domain containing 1                             | ENSG00000024526 | -1.012 | 1.60E-02 |
| <i>DEPDC1B</i>      | DEP domain containing 1B                            | ENSG00000035499 | -1.627 | 1.30E-03 |
| <i>DEPTOR</i>       | DEP domain containing MTOR interacting protein      | ENSG00000155792 | 1.345  | 2.00E-03 |
| <i>DHCR24</i>       | 24-dehydrocholesterol reductase                     | ENSG00000116133 | 0.957  | 1.50E-02 |
| <i>DIAPH3</i>       | diaphanous related formin 3                         | ENSG00000139734 | -1.107 | 7.90E-03 |
| <i>DIAPH3-AS1</i>   | DIAPH3 antisense RNA 1                              | ENSG00000227528 | -1.835 | 9.40E-03 |
| <i>DIO2</i>         | iodothyronine deiodinase 2                          | ENSG00000211448 | 2.308  | 2.70E-06 |
| <i>DKFZP434P228</i> |                                                     | ENSG00000279232 | -0.905 | 3.00E-02 |
| <i>DLGAP1</i>       | DLG associated protein 1                            | ENSG00000170579 | 0.892  | 5.00E-02 |
| <i>DLGAP1-AS4</i>   | DLGAP1 antisense RNA 4                              | ENSG00000263878 | 6.969  | 1.70E-04 |
| <i>DLGAP5</i>       | DLG associated protein 5                            | ENSG00000126787 | -1.608 | 1.50E-04 |
| <i>DLSTP1</i>       | dihydrolipoamide S-succinyltransferase pseudogene 1 | ENSG00000181227 | 6.390  | 2.30E-03 |
| <i>DMBT1</i>        | deleted in malignant brain tumors 1                 | ENSG00000187908 | 2.327  | 1.20E-05 |
| <i>DNA2</i>         | DNA replication helicase/nuclease 2                 | ENSG00000138346 | -1.082 | 2.30E-02 |
| <i>DNAJC9</i>       | DnaJ heat shock protein family (Hsp40) member C9    | ENSG00000213551 | -1.029 | 1.20E-02 |
| <i>DNER</i>         | delta/notch like EGF repeat containing              | ENSG00000187957 | 3.217  | 7.80E-03 |
| <i>DNMT3B</i>       | DNA methyltransferase 3 beta                        | ENSG00000088305 | -1.235 | 8.00E-03 |
| <i>DOK3</i>         | docking protein 3                                   | ENSG00000146094 | -1.424 | 9.60E-03 |
| <i>DPF1</i>         | double PHD fingers 1                                | ENSG00000011332 | -1.428 | 8.60E-03 |
| <i>DPY19L3</i>      | dpy-19 like C-mannosyltransferase 3                 | ENSG00000178904 | 0.831  | 4.70E-02 |
| <i>DRAXIN</i>       | dorsal inhibitory axon guidance protein             | ENSG00000162490 | -2.905 | 1.40E-03 |
| <i>DSN1</i>         | DSN1 component of MIS12 kinetochore complex         | ENSG00000149636 | -1.244 | 4.70E-03 |
| <i>DTL</i>          | denticleless E3 ubiquitin protein ligase homolog    | ENSG00000143476 | -1.209 | 4.60E-03 |
| <i>DTWD1</i>        | DTW domain containing 1                             | ENSG00000104047 | 1.145  | 5.20E-03 |
| <i>DTYMK</i>        | deoxythymidylate kinase                             | ENSG00000168393 | -1.142 | 5.30E-03 |
| <i>DUSP1</i>        | dual specificity phosphatase 1                      | ENSG00000120129 | 1.230  | 2.10E-03 |
| <i>DUSP5</i>        | dual specificity phosphatase 5                      | ENSG00000138166 | -1.716 | 4.80E-04 |

|                      |                                                                   |                 |        |          |
|----------------------|-------------------------------------------------------------------|-----------------|--------|----------|
| <i>DUSP8P5</i>       | dual specificity phosphatase 8 pseudo-gene 5                      | ENSG00000235316 | 1.377  | 3.60E-02 |
| <i>E2F1</i>          | E2F transcription factor 1                                        | ENSG00000101412 | -0.878 | 3.40E-02 |
| <i>E2F7</i>          | E2F transcription factor 7                                        | ENSG00000165891 | -0.920 | 2.10E-02 |
| <i>E2F8</i>          | E2F transcription factor 8                                        | ENSG00000129173 | -1.229 | 2.50E-02 |
| <i>ECT2</i>          | epithelial cell transforming 2                                    | ENSG00000114346 | -0.849 | 3.60E-02 |
| <i>EDN1</i>          | endothelin 1                                                      | ENSG00000078401 | 1.834  | 9.00E-04 |
| <i>EEF1G</i>         | eukaryotic translation elongation factor 1 gamma                  | ENSG00000254772 | -2.145 | 3.90E-02 |
| <i>EFCAB14-AS1</i>   | EFCAB14 antisense RNA 1                                           | ENSG00000228237 | 1.206  | 3.50E-02 |
| <i>EFCAB2</i>        | EF-hand calcium binding domain 2                                  | ENSG00000203666 | 1.070  | 3.90E-02 |
| <i>EFEMP1</i>        | EGF containing fibulin extracellular matrix protein 1             | ENSG00000115380 | 1.128  | 4.30E-03 |
| <i>EFHD2</i>         | EF-hand domain family member D2                                   | ENSG00000142634 | -0.984 | 1.50E-02 |
| <i>EGFL8</i>         | EGF like domain multiple 8                                        | ENSG00000241404 | 1.719  | 3.10E-02 |
| <i>EGR2</i>          | early growth response 2                                           | ENSG00000122877 | -1.225 | 4.10E-02 |
| <i>EGR3</i>          | early growth response 3                                           | ENSG00000179388 | -1.059 | 1.20E-02 |
| <i>EMC3-AS1</i>      | EMC3 antisense RNA 1                                              | ENSG00000180385 | -1.229 | 2.50E-02 |
| <i>EMP2</i>          | epithelial membrane protein 2                                     | ENSG00000213853 | -0.866 | 4.40E-02 |
| <i>ENOSF1</i>        | enolase superfamily member 1                                      | ENSG00000132199 | -0.987 | 1.60E-02 |
| <i>EPHA5</i>         | EPH receptor A5                                                   | ENSG00000145242 | 1.505  | 1.20E-03 |
| <i>EPHA5-AS1</i>     | EPHA5 antisense RNA 1                                             | ENSG00000250846 | 1.337  | 4.40E-02 |
| <i>EPHB2</i>         | EPH receptor B2                                                   | ENSG00000133216 | -0.867 | 3.00E-02 |
| <i>EPPK1</i>         | epiplakin 1                                                       | ENSG00000261150 | 6.266  | 3.90E-03 |
| <i>ERCC6L</i>        | ERCC excision repair 6 like, spindle assembly checkpoint helicase | ENSG00000186871 | -1.326 | 7.70E-03 |
| <i>ERFE</i>          | erythroferrone                                                    | ENSG00000178752 | -1.851 | 3.10E-02 |
| <i>ERI1</i>          | exoribonuclease 1                                                 | ENSG00000104626 | -1.114 | 1.30E-02 |
| <i>ERICH3</i>        | glutamate rich 3                                                  | ENSG00000178965 | -4.084 | 1.20E-03 |
| <i>ERN2</i>          | endoplasmic reticulum to nucleus signaling 2                      | ENSG00000134398 | -2.008 | 2.80E-02 |
| <i>ESCO2</i>         | establishment of sister chromatid cohesion N-acetyltransferase 2  | ENSG00000171320 | -2.029 | 3.20E-05 |
| <i>ESPL1</i>         | extra spindle pole bodies like 1, separase                        | ENSG00000135476 | -1.550 | 3.00E-04 |
| <i>ETS1</i>          | ETS proto-oncogene 1, transcription factor                        | ENSG00000134954 | -0.952 | 2.10E-02 |
| <i>EXO1</i>          | exonuclease 1                                                     | ENSG00000174371 | -1.480 | 1.00E-03 |
| <i>EXOSC8</i>        | exosome component 8                                               | ENSG00000120699 | -0.870 | 4.40E-02 |
| <i>EZH2</i>          | enhancer of zeste 2 polycomb repressive complex 2 subunit         | ENSG00000106462 | -0.959 | 2.40E-02 |
| <i>FA2H</i>          | fatty acid 2-hydroxylase                                          | ENSG00000103089 | 2.037  | 3.30E-03 |
| <i>FAHD2CP</i>       | fumarylacetoacetate hydrolase domain containing 2C, pseudogene    | ENSG00000231584 | -1.186 | 2.30E-02 |
| <i>FAIM2</i>         | Fas apoptotic inhibitory molecule 2                               | ENSG00000135472 | 6.266  | 3.90E-03 |
| <i>FAM110A</i>       | family with sequence similarity 110 member A                      | ENSG00000125898 | -1.259 | 6.50E-03 |
| <i>FAM166A</i>       | family with sequence similarity 166 member A                      | ENSG00000188163 | -1.066 | 1.40E-02 |
| <i>FAM72C/FAM72D</i> | family with sequence similarity 72 member D                       | ENSG00000263513 | -3.603 | 1.30E-02 |
| <i>FAM83D</i>        | family with sequence similarity 83 member D                       | ENSG00000101447 | -1.830 | 2.20E-05 |
| <i>FANCA</i>         | FA complementation group A                                        | ENSG00000187741 | -0.939 | 2.30E-02 |
| <i>FANCD2</i>        | FA complementation group D2                                       | ENSG00000144554 | -1.145 | 8.80E-03 |

|                  |                                                      |                 |        |          |
|------------------|------------------------------------------------------|-----------------|--------|----------|
| <i>FANCG</i>     | FA complementation group G                           | ENSG00000221829 | -0.888 | 3.60E-02 |
| <i>FANCI</i>     | FA complementation group I                           | ENSG00000140525 | -0.991 | 1.50E-02 |
| <i>FANCM</i>     | FA complementation group M                           | ENSG00000187790 | -1.141 | 2.80E-02 |
| <i>FAT1</i>      | FAT atypical cadherin 1                              | ENSG00000083857 | 1.250  | 1.60E-03 |
| <i>FBXO5</i>     | F-box protein 5                                      | ENSG00000112029 | -1.449 | 1.30E-03 |
| <i>FCMR</i>      | Fc fragment of IgM receptor                          | ENSG00000162894 | 2.477  | 5.10E-04 |
| <i>FEN1</i>      | flap structure-specific endonuclease 1               | ENSG00000168496 | -1.169 | 4.40E-03 |
| <i>FEZF1</i>     | FEZ family zinc finger 1                             | ENSG00000128610 | 1.258  | 4.60E-02 |
| <i>FEZF1-AS1</i> | FEZF1 antisense RNA 1                                | ENSG00000230316 | 2.038  | 7.80E-04 |
| <i>FGF1</i>      | fibroblast growth factor 1                           | ENSG00000113578 | -1.644 | 6.10E-03 |
| <i>FGF5</i>      | fibroblast growth factor 5                           | ENSG00000138675 | -2.196 | 1.20E-03 |
| <i>FGF7</i>      | fibroblast growth factor 7                           | ENSG00000140285 | 2.945  | 3.80E-05 |
| <i>FHDC1</i>     | FH2 domain containing 1                              | ENSG00000137460 | 2.564  | 1.90E-02 |
| <i>FLNC</i>      | filamin C                                            | ENSG00000128591 | -0.921 | 2.00E-02 |
| <i>FLRT3</i>     | fibronectin leucine rich transmembrane protein 3     | ENSG00000125848 | 2.000  | 1.60E-03 |
| <i>FNDC1</i>     | fibronectin type III domain containing 1             | ENSG00000164694 | -1.509 | 2.40E-02 |
| <i>FOSL1</i>     | FOS like 1, AP-1 transcription factor sub-unit       | ENSG00000175592 | -1.004 | 1.10E-02 |
| <i>FOXF2</i>     | forkhead box F2                                      | ENSG00000137273 | 1.554  | 9.80E-04 |
| <i>FOXG1</i>     | forkhead box G1                                      | ENSG00000176165 | -0.834 | 4.50E-02 |
| <i>FOXM1</i>     | forkhead box M1                                      | ENSG00000111206 | -1.262 | 1.90E-03 |
| <i>FOXO1</i>     | forkhead box O1                                      | ENSG00000150907 | 1.412  | 1.60E-03 |
| <i>FOXS1</i>     | forkhead box S1                                      | ENSG00000179772 | -1.981 | 1.70E-04 |
| <i>FSHR</i>      | follicle stimulating hormone receptor                | ENSG00000170820 | 3.080  | 1.90E-04 |
| <i>FUT10</i>     | fucosyltransferase 10                                | ENSG00000172728 | 0.935  | 4.60E-02 |
| <i>GAB2</i>      | GRB2 associated binding protein 2                    | ENSG00000033327 | 0.925  | 2.20E-02 |
| <i>GADD45A</i>   | growth arrest and DNA damage inducible alpha         | ENSG00000116717 | -0.783 | 5.00E-02 |
| <i>GALNT1</i>    | polypeptide N-acetylgalactosaminyltransferase 1      | ENSG00000141429 | 1.488  | 1.90E-04 |
| <i>GALNT15</i>   | polypeptide N-acetylgalactosaminyltransferase 15     | ENSG00000131386 | 6.887  | 2.80E-04 |
| <i>GAREM1</i>    | GRB2 associated regulator of MAPK1 subtype 1         | ENSG00000141441 | 0.930  | 3.10E-02 |
| <i>GAS1</i>      | growth arrest specific 1                             | ENSG00000180447 | 1.969  | 7.80E-05 |
| <i>GAS2L3</i>    | growth arrest specific 2 like 3                      | ENSG00000139354 | -1.336 | 5.80E-03 |
| <i>GATA5</i>     | GATA binding protein 5                               | ENSG00000130700 | 1.186  | 8.80E-03 |
| <i>GATA6-AS1</i> | GATA6 antisense RNA 1 (head to head)                 | ENSG00000266010 | 1.174  | 3.40E-02 |
| <i>GBP4</i>      | guanylate binding protein 4                          | ENSG00000162654 | 0.855  | 3.20E-02 |
| <i>GEM</i>       | GTP binding protein overexpressed in skeletal muscle | ENSG00000164949 | -1.556 | 3.50E-04 |
| <i>GFPT2</i>     | glutamine-fructose-6-phosphate transaminase 2        | ENSG00000131459 | -1.328 | 2.00E-03 |
| <i>GIN1</i>      | GIN5 complex subunit 1                               | ENSG00000101003 | -1.076 | 1.60E-02 |
| <i>GIN2</i>      | GIN5 complex subunit 2                               | ENSG00000131153 | -0.930 | 4.10E-02 |
| <i>GIN4</i>      | GIN5 complex subunit 4                               | ENSG00000147536 | -1.820 | 5.90E-05 |
| <i>GLP2R</i>     | glucagon like peptide 2 receptor                     | ENSG00000065325 | 2.997  | 2.00E-02 |
| <i>GLRX</i>      | glutaredoxin                                         | ENSG00000173221 | 0.842  | 3.70E-02 |
| <i>GMNN</i>      | geminin DNA replication inhibitor                    | ENSG00000112312 | -1.018 | 1.80E-02 |
| <i>GNAI1</i>     | G protein subunit alpha i1                           | ENSG00000127955 | 1.315  | 1.50E-03 |
| <i>GNB3</i>      | G protein subunit beta 3                             | ENSG00000111664 | -1.691 | 1.70E-02 |
| <i>GNPTAB</i>    | N-acetylglucosamine-1-phosphate trans-               | ENSG00000111670 | 1.212  | 2.50E-03 |

|                                  |                                                                |                 |        |          |
|----------------------------------|----------------------------------------------------------------|-----------------|--------|----------|
|                                  | ferase subunits alpha and beta                                 |                 |        |          |
| <i>GOLGA8J</i> (includes others) | golgin A8 family member K                                      | ENSG00000232653 | 2.385  | 4.10E-02 |
| <i>GON7</i>                      | GON7 subunit of KEOPS complex                                  | ENSG00000170270 | -1.395 | 1.10E-02 |
| <i>GPC4</i>                      | glypican 4                                                     | ENSG00000076716 | 1.168  | 4.10E-03 |
| <i>GPC6</i>                      | glypican 6                                                     | ENSG00000183098 | 1.002  | 1.20E-02 |
| <i>GPR135</i>                    | G protein-coupled receptor 135                                 | ENSG00000181619 | 1.140  | 3.20E-02 |
| <i>GPR68</i>                     | G protein-coupled receptor 68                                  | ENSG00000119714 | -1.447 | 4.10E-02 |
| <i>GPR85</i>                     | G protein-coupled receptor 85                                  | ENSG00000164604 | 1.193  | 3.20E-02 |
| <i>GPRASP1</i>                   | G protein-coupled receptor associated sorting protein 1        | ENSG00000198932 | 1.526  | 3.00E-02 |
| <i>GPRC5A</i>                    | G protein-coupled receptor class C group 5 member A            | ENSG00000013588 | 1.518  | 4.40E-04 |
| <i>GPRIN1</i>                    | G protein regulated inducer of neurite outgrowth 1             | ENSG00000169258 | -0.953 | 4.80E-02 |
| <i>GRAMD1B</i>                   | GRAM domain containing 1B                                      | ENSG00000023171 | 1.670  | 7.90E-04 |
| <i>GREM1</i>                     | gremlin 1, DAN family BMP antagonist                           | ENSG00000166923 | 1.625  | 4.10E-03 |
| <i>GRIA4</i>                     | glutamate ionotropic receptor AMPA type subunit 4              | ENSG00000152578 | 2.660  | 1.10E-04 |
| <i>GRK3</i>                      | G protein-coupled receptor kinase 3                            | ENSG00000100077 | -1.449 | 3.90E-02 |
| <i>GTSE1</i>                     | G2 and S-phase expressed 1                                     | ENSG00000075218 | -1.850 | 2.20E-05 |
| <i>H2AC11</i>                    | H2A clustered histone 11                                       | ENSG00000196787 | -2.122 | 1.90E-02 |
| <i>H2AX</i>                      | H2A.X variant histone                                          | ENSG00000188486 | -1.106 | 5.40E-03 |
| <i>H2AZ1</i>                     | H2A.Z variant histone 1                                        | ENSG00000164032 | -1.111 | 5.20E-03 |
| <i>H2AZ1-DT</i>                  | H2AZ1 divergent transcript                                     | ENSG00000245322 | -1.293 | 1.40E-03 |
| <i>H3C6</i>                      | H3 clustered histone 6                                         | ENSG00000274750 | 1.300  | 1.80E-02 |
| <i>HASPIN</i>                    | histone H3 associated protein kinase                           | ENSG00000177602 | -1.056 | 3.60E-02 |
| <i>HAUS8</i>                     | HAUS augmin like complex subunit 8                             | ENSG00000131351 | -1.291 | 5.80E-03 |
| <i>HEG1</i>                      | heart development protein with EGF like domains 1              | ENSG00000173706 | 1.556  | 9.70E-05 |
| <i>HES1</i>                      | hes family bHLH transcription factor 1                         | ENSG00000114315 | -1.392 | 2.30E-03 |
| <i>HEY1</i>                      | hes related family bHLH transcription factor with YRPW motif 1 | ENSG00000164683 | -1.509 | 2.40E-02 |
| <i>HHAT</i>                      | hedgehog acyltransferase                                       | ENSG00000054392 | 1.092  | 2.60E-02 |
| <i>HIP1</i>                      | huntingtin interacting protein 1                               | ENSG00000127946 | -0.831 | 4.00E-02 |
| <i>HJURP</i>                     | Holliday junction recognition protein                          | ENSG00000123485 | -1.722 | 5.90E-05 |
| <i>HLA-DMA</i>                   | major histocompatibility complex, class II, DM alpha           | ENSG00000204257 | 1.217  | 2.20E-02 |
| <i>HLA-DMB</i>                   | major histocompatibility complex, class II, DM beta            | ENSG00000242574 | 2.299  | 6.00E-04 |
| <i>HLA-DOA</i>                   | major histocompatibility complex, class II, DO alpha           | ENSG00000204252 | 2.737  | 3.30E-02 |
| <i>HLA-DPA1</i>                  | major histocompatibility complex, class II, DP alpha 1         | ENSG00000231389 | 2.612  | 2.70E-03 |
| <i>HLA-DRA</i>                   | major histocompatibility complex, class II, DR alpha           | ENSG00000204287 | 1.890  | 4.20E-05 |
| <i>HLA-DRB1</i>                  | major histocompatibility complex, class II, DR beta 1          | ENSG00000196126 | 1.294  | 2.40E-02 |
| <i>HMGA1</i>                     | high mobility group AT-hook 1                                  | ENSG00000137309 | -1.301 | 1.00E-03 |
| <i>HMGA2</i>                     | high mobility group AT-hook 2                                  | ENSG00000149948 | -0.870 | 3.40E-02 |
| <i>HMGB1</i>                     | high mobility group box 1                                      | ENSG00000189403 | -0.779 | 4.80E-02 |
| <i>HMGB2</i>                     | high mobility group box 2                                      | ENSG00000164104 | -1.582 | 1.00E-04 |
| <i>HMGN2P3</i>                   | high mobility group nucleosomal binding                        | ENSG00000230330 | -1.759 | 4.20E-02 |



|                   |                                                               |                 |        |          |
|-------------------|---------------------------------------------------------------|-----------------|--------|----------|
|                   | domain 2 pseudogene 3                                         |                 |        |          |
| <i>HMGN2P5</i>    | high mobility group nucleosomal binding domain 2 pseudogene 5 | ENSG00000234664 | -1.633 | 1.40E-02 |
| <i>HMMR</i>       | hyaluronan mediated motility receptor                         | ENSG00000072571 | -1.621 | 1.90E-04 |
| <i>HMMR-AS1</i>   | HMMR antisense RNA 1                                          | ENSG00000251018 | -1.641 | 5.00E-03 |
| <i>HSD17B6</i>    | hydroxysteroid 17-beta dehydrogenase 6                        | ENSG00000025423 | -1.383 | 4.90E-02 |
| <i>HTRA3</i>      | HtrA serine peptidase 3                                       | ENSG00000170801 | 2.910  | 5.00E-04 |
| <i>ID2</i>        | inhibitor of DNA binding 2                                    | ENSG00000115738 | 1.227  | 3.30E-03 |
| <i>IGF1R</i>      | insulin like growth factor 1 receptor                         | ENSG00000140443 | 0.860  | 3.00E-02 |
| <i>IGF2BP3</i>    | insulin like growth factor 2 mRNA binding protein 3           | ENSG00000136231 | -0.886 | 3.20E-02 |
| <i>IGFBP3</i>     | insulin like growth factor binding protein 3                  | ENSG00000146674 | 0.955  | 1.80E-02 |
| <i>IGFBP4</i>     | insulin like growth factor binding protein 4                  | ENSG00000141753 | 1.565  | 1.70E-04 |
| <i>IGFBP5</i>     | insulin like growth factor binding protein 5                  | ENSG00000115461 | 1.103  | 5.10E-03 |
| <i>IGSF10</i>     | immunoglobulin superfamily member 10                          | ENSG00000152580 | 1.425  | 1.60E-02 |
| <i>IL11</i>       | interleukin 11                                                | ENSG00000095752 | 2.098  | 4.50E-07 |
| <i>IL16</i>       | interleukin 16                                                | ENSG00000172349 | 1.569  | 2.90E-03 |
| <i>IL34</i>       | interleukin 34                                                | ENSG00000157368 | -1.159 | 1.50E-02 |
| <i>IL4R</i>       | interleukin 4 receptor                                        | ENSG00000077238 | 1.279  | 1.70E-03 |
| <i>INCENP</i>     | inner centromere protein                                      | ENSG00000149503 | -1.133 | 5.60E-03 |
| <i>INHA</i>       | inhibin subunit alpha                                         | ENSG00000123999 | 2.440  | 6.80E-04 |
| <i>INHBA</i>      | inhibin subunit beta A                                        | ENSG00000122641 | 1.257  | 4.70E-03 |
| <i>IQGAP3</i>     | IQ motif containing GTPase activating protein 3               | ENSG00000183856 | -1.715 | 4.60E-05 |
| <i>IRF1</i>       | interferon regulatory factor 1                                | ENSG00000125347 | -0.819 | 4.30E-02 |
| <i>IRF8</i>       | interferon regulatory factor 8                                | ENSG00000140968 | -1.264 | 1.50E-02 |
| <i>ISLR</i>       | immunoglobulin superfamily containing leucine rich repeat     | ENSG00000129009 | -1.902 | 7.00E-03 |
| <i>ISLR2</i>      | immunoglobulin superfamily containing leucine rich repeat 2   | ENSG00000167178 | -4.084 | 1.20E-03 |
| <i>ITGA1</i>      | integrin subunit alpha 1                                      | ENSG00000213949 | 0.937  | 1.70E-02 |
| <i>ITGB1-DT</i>   | ITGB1 divergent transcript                                    | ENSG00000229656 | -2.520 | 7.10E-03 |
| <i>ITPKA</i>      | inositol-trisphosphate 3-kinase A                             | ENSG00000137825 | -1.359 | 1.30E-02 |
| <i>ITPR3</i>      | inositol 1,4,5-trisphosphate receptor type 3                  | ENSG00000096433 | -1.361 | 8.10E-04 |
| <i>JCAD</i>       | junctional cadherin 5 associated                              | ENSG00000165757 | 0.872  | 2.80E-02 |
| <i>JMJD1C-AS1</i> | JMJD1C antisense RNA 1                                        | ENSG00000272767 | -1.301 | 3.60E-02 |
| <i>JUN</i>        | Jun proto-oncogene, AP-1 transcription factor subunit         | ENSG00000177606 | -0.939 | 1.80E-02 |
| <i>KANK3</i>      | KN motif and ankyrin repeat domains 3                         | ENSG00000186994 | -2.015 | 2.10E-02 |
| <i>KATNA1</i>     | katanin catalytic subunit A1                                  | ENSG00000186625 | -0.932 | 3.80E-02 |
| <i>KB_1471A81</i> |                                                               | ENSG00000245330 | 1.455  | 2.30E-02 |
| <i>KCNB1</i>      | potassium voltage-gated channel subfamily B member 1          | ENSG00000158445 | 3.111  | 1.30E-02 |
| <i>KCND2</i>      | potassium voltage-gated channel subfamily D member 2          | ENSG00000184408 | 1.037  | 3.20E-02 |
| <i>KCNK12</i>     | potassium two pore domain channel subfamily K member 12       | ENSG00000184261 | -0.862 | 4.30E-02 |
| <i>KCNK3</i>      | potassium two pore domain channel subfamily K member 3        | ENSG00000171303 | -1.072 | 1.70E-02 |
| <i>KCNN4</i>      | potassium calcium-activated channel sub-                      | ENSG00000104783 | -1.276 | 2.00E-03 |

|                  |                                                                |                 |        |          |
|------------------|----------------------------------------------------------------|-----------------|--------|----------|
|                  | family N member 4                                              |                 |        |          |
| <i>KCNT2</i>     | potassium sodium-activated channel sub-family T member 2       | ENSG00000162687 | 1.157  | 2.40E-02 |
| <i>KCTD16</i>    | potassium channel tetramerization domain containing 16         | ENSG00000183775 | 1.842  | 3.50E-04 |
| <i>KIAA1958</i>  | KIAA1958                                                       | ENSG00000165185 | 0.922  | 3.60E-02 |
| <i>KIF11</i>     | kinesin family member 11                                       | ENSG00000138160 | -1.291 | 1.70E-03 |
| <i>KIF14</i>     | kinesin family member 14                                       | ENSG00000118193 | -1.689 | 7.30E-05 |
| <i>KIF15</i>     | kinesin family member 15                                       | ENSG00000163808 | -1.709 | 2.50E-04 |
| <i>KIF18B</i>    | kinesin family member 18B                                      | ENSG00000186185 | -1.660 | 1.00E-04 |
| <i>KIF20A</i>    | kinesin family member 20A                                      | ENSG00000112984 | -1.424 | 5.80E-04 |
| <i>KIF20B</i>    | kinesin family member 20B                                      | ENSG00000138182 | -1.367 | 1.10E-03 |
| <i>KIF22</i>     | kinesin family member 22                                       | ENSG00000079616 | -1.189 | 3.80E-03 |
| <i>KIF23</i>     | kinesin family member 23                                       | ENSG00000137807 | -1.407 | 7.10E-04 |
| <i>KIF24</i>     | kinesin family member 24                                       | ENSG00000186638 | -1.254 | 8.20E-03 |
| <i>KIF26A</i>    | kinesin family member 26A                                      | ENSG00000066735 | 4.297  | 5.00E-17 |
| <i>KIF26B</i>    | kinesin family member 26B                                      | ENSG00000162849 | -1.771 | 5.80E-03 |
| <i>KIF2C</i>     | kinesin family member 2C                                       | ENSG00000142945 | -1.643 | 1.00E-04 |
| <i>KIF4A</i>     | kinesin family member 4A                                       | ENSG00000090889 | -1.590 | 2.00E-04 |
| <i>KIFC1</i>     | kinesin family member C1                                       | ENSG00000237649 | -1.796 | 1.80E-05 |
| <i>KLF10</i>     | Kruppel like factor 10                                         | ENSG00000155090 | -1.297 | 2.20E-03 |
| <i>KLF9</i>      | Kruppel like factor 9                                          | ENSG00000119138 | 2.213  | 1.40E-05 |
| <i>KNL1</i>      | kinetochore scaffold 1                                         | ENSG00000137812 | -1.562 | 2.80E-04 |
| <i>KNSTRN</i>    | kinetochore localized astrin (SPAG5) binding protein           | ENSG00000128944 | -1.317 | 2.80E-03 |
| <i>KNTC1</i>     | kinetochore associated 1                                       | ENSG00000184445 | -0.848 | 4.60E-02 |
| <i>KPNA2</i>     | karyopherin subunit alpha 2                                    | ENSG00000182481 | -1.143 | 4.30E-03 |
| <i>KRT15</i>     | keratin 15                                                     | ENSG00000171346 | -1.480 | 4.10E-03 |
| <i>KSR1</i>      | kinase suppressor of ras 1                                     | ENSG00000141068 | 1.760  | 1.60E-05 |
| <i>LBH</i>       | LBH regulator of WNT signaling pathway                         | ENSG00000213626 | 0.872  | 3.30E-02 |
| <i>LCP1</i>      | lymphocyte cytosolic protein 1                                 | ENSG00000136167 | -1.448 | 4.00E-02 |
| <i>LDHD</i>      | lactate dehydrogenase D                                        | ENSG00000166816 | 3.111  | 1.30E-02 |
| <i>LEF1</i>      | lymphoid enhancer binding factor 1                             | ENSG00000138795 | -1.902 | 7.00E-03 |
| <i>LFNG</i>      | LFNG O-fucosylpeptide 3-beta-N-acetylglucosaminyltransferase   | ENSG00000106003 | -1.126 | 8.90E-03 |
| <i>LHX1-DT</i>   | LHX1 divergent transcript                                      | ENSG00000277268 | -3.073 | 1.90E-03 |
| <i>LHX9</i>      | LIM homeobox 9                                                 | ENSG00000143355 | 1.287  | 5.50E-03 |
| <i>LIMCH1</i>    | LIM and calponin homology domains 1                            | ENSG00000064042 | 1.808  | 8.30E-06 |
| <i>LIME1</i>     | Lck interacting transmembrane adaptor 1                        | ENSG00000203896 | 1.416  | 2.20E-02 |
| <i>LIN9</i>      | lin-9 DREAM MuvB core complex component                        | ENSG00000183814 | -1.300 | 1.30E-02 |
| <i>LINC-PINT</i> | long intergenic non-protein coding RNA, p53 induced transcript | ENSG00000231721 | 1.432  | 4.10E-03 |
| <i>LINC00106</i> | long intergenic non-protein coding RNA 106                     | ENSG00000236871 | 1.212  | 2.70E-02 |
| <i>LINC00472</i> | long intergenic non-protein coding RNA 472                     | ENSG00000233237 | 1.970  | 2.20E-02 |
| <i>LINC00511</i> | long intergenic non-protein coding RNA 511                     | ENSG00000227036 | -1.518 | 3.10E-02 |
| <i>LINC00624</i> | long intergenic non-protein coding RNA 624                     | ENSG00000278811 | -1.704 | 7.70E-03 |
| <i>LINC00685</i> | long intergenic non-protein coding RNA 685                     | ENSG00000226179 | 3.111  | 1.30E-02 |

|                     |                                                             |                 |        |          |
|---------------------|-------------------------------------------------------------|-----------------|--------|----------|
| <i>LINC00894</i>    | long intergenic non-protein coding RNA 894                  | ENSG00000235703 | 2.755  | 2.80E-04 |
| <i>LINC01004</i>    | long intergenic non-protein coding RNA 1004                 | ENSG00000228393 | 2.737  | 3.30E-02 |
| <i>LINC01117</i>    | long intergenic non-protein coding RNA 1117                 | ENSG00000224577 | -1.765 | 1.30E-02 |
| <i>LINC01358</i>    | long intergenic non-protein coding RNA 1358                 | ENSG00000237352 | -2.145 | 3.90E-02 |
| <i>LINC01485</i>    | long intergenic non-protein coding RNA 1485                 | ENSG00000254211 | 1.970  | 2.20E-02 |
| <i>LINC01605</i>    | long intergenic non-protein coding RNA 1605                 | ENSG00000253161 | -2.324 | 1.50E-06 |
| <i>LINC02615</i>    | long intergenic non-protein coding RNA 2615                 | ENSG00000251432 | 3.315  | 4.80E-03 |
| <i>LLGL2</i>        | LLGL scribble cell polarity complex component 2             | ENSG00000073350 | 1.075  | 3.00E-02 |
| <i>LMCD1</i>        | LIM and cysteine rich domains 1                             | ENSG00000071282 | -1.031 | 4.50E-02 |
| <i>LMNA</i>         | lamin A/C                                                   | ENSG00000160789 | -0.797 | 4.20E-02 |
| <i>LMNB1</i>        | lamin B1                                                    | ENSG00000113368 | -1.625 | 7.80E-05 |
| <i>LMNB2</i>        | lamin B2                                                    | ENSG00000176619 | -1.477 | 2.30E-04 |
| <i>LMO2</i>         | LIM domain only 2                                           | ENSG00000135363 | -2.698 | 1.30E-02 |
| <i>LMO4</i>         | LIM domain only 4                                           | ENSG00000143013 | 0.939  | 1.80E-02 |
| <i>LOC100288637</i> | OTU deubiquitinase 7A pseudogene                            | ENSG00000187951 | -0.948 | 3.80E-02 |
| <i>LOC101927267</i> | uncharacterized LOC101927267                                | ENSG00000258334 | -2.406 | 1.10E-02 |
| <i>LOC101927552</i> | uncharacterized LOC101927552                                | ENSG00000226877 | 2.867  | 6.20E-03 |
| <i>LOC101927751</i> | uncharacterized LOC101927751                                | ENSG00000259583 | -0.991 | 2.00E-02 |
| <i>LOC101928728</i> | uncharacterized LOC101928728                                | ENSG00000260063 | -6.961 | 2.80E-04 |
| <i>LOC102724684</i> | uncharacterized LOC102724684                                | ENSG00000267026 | -6.586 | 2.30E-03 |
| <i>LOC105369760</i> |                                                             | ENSG00000258017 | -1.238 | 1.80E-03 |
| <i>LOC105371050</i> |                                                             | ENSG00000260874 | -1.402 | 7.40E-03 |
| <i>LOC105372097</i> |                                                             | ENSG00000270112 | -2.547 | 2.00E-02 |
| <i>LOC105375304</i> | uncharacterized LOC105375304                                | ENSG00000225792 | 2.163  | 2.10E-02 |
| <i>LOC339192</i>    | uncharacterized LOC339192                                   | ENSG00000267121 | 2.385  | 4.10E-02 |
| <i>LOC644135</i>    | uncharacterized LOC644135                                   | ENSG00000237596 | 4.021  | 8.20E-10 |
| <i>LRR1</i>         | leucine rich repeat protein 1                               | ENSG00000165501 | -1.103 | 1.60E-02 |
| <i>LRRC8C</i>       | leucine rich repeat containing 8 VRAC subunit C             | ENSG00000171488 | -0.900 | 4.30E-02 |
| <i>LRRK2</i>        | leucine rich repeat kinase 2                                | ENSG00000188906 | 1.102  | 3.40E-02 |
| <i>LYAR</i>         | Ly1 antibody reactive                                       | ENSG00000145220 | -0.979 | 4.00E-02 |
| <i>MAD2L1</i>       | mitotic arrest deficient 2 like 1                           | ENSG00000164109 | -1.153 | 6.70E-03 |
| <i>MALL</i>         | mal, T cell differentiation protein like                    | ENSG00000144063 | -1.710 | 1.10E-02 |
| <i>MAP1B</i>        | microtubule associated protein 1B                           | ENSG00000131711 | -0.800 | 4.50E-02 |
| <i>MAP6D1</i>       | MAP6 domain containing 1                                    | ENSG00000180834 | -1.135 | 4.50E-02 |
| <i>MARCHF4</i>      | membrane associated ring-CH-type finger 4                   | ENSG00000144583 | -1.744 | 8.80E-03 |
| <i>MASP1</i>        | mannan binding lectin serine peptidase 1                    | ENSG00000127241 | 1.839  | 1.70E-02 |
| <i>MB</i>           | myoglobin                                                   | ENSG00000198125 | -1.134 | 1.70E-02 |
| <i>MCM10</i>        | minichromosome maintenance 10 replication initiation factor | ENSG00000065328 | -1.469 | 9.90E-04 |
| <i>MCM2</i>         | minichromosome maintenance complex component 2              | ENSG00000073111 | -1.126 | 5.40E-03 |
| <i>MCM3</i>         | minichromosome maintenance complex component 3              | ENSG00000112118 | -0.833 | 3.70E-02 |

|                    |                                                                     |                 |        |          |
|--------------------|---------------------------------------------------------------------|-----------------|--------|----------|
| <i>MCM4</i>        | minichromosome maintenance complex component 4                      | ENSG00000104738 | -1.261 | 1.70E-03 |
| <i>MCM5</i>        | minichromosome maintenance complex component 5                      | ENSG00000100297 | -1.307 | 1.40E-03 |
| <i>MCM6</i>        | minichromosome maintenance complex component 6                      | ENSG00000076003 | -0.894 | 2.90E-02 |
| <i>MCM7</i>        | minichromosome maintenance complex component 7                      | ENSG00000166508 | -0.821 | 3.90E-02 |
| <i>MCM8</i>        | minichromosome maintenance 8 homologous recombination repair factor | ENSG00000125885 | -0.855 | 5.00E-02 |
| <i>MCOLN1</i>      | mucolipin 1                                                         | ENSG00000090674 | 0.841  | 3.90E-02 |
| <i>MELK</i>        | maternal embryonic leucine zipper kinase                            | ENSG00000165304 | -1.543 | 2.30E-04 |
| <i>MET</i>         | MET proto-oncogene, receptor tyrosine kinase                        | ENSG00000105976 | -0.914 | 2.80E-02 |
| <i>METTL7B</i>     | methyltransferase like 7B                                           | ENSG00000170439 | -1.590 | 8.00E-03 |
| <i>MGST1</i>       | microsomal glutathione S-transferase 1                              | ENSG00000008394 | 0.793  | 4.80E-02 |
| <i>MIR181A1HG</i>  | MIR181A1 host gene                                                  | ENSG00000229989 | -2.008 | 2.80E-02 |
| <i>MIS18A</i>      | MIS18 kinetochore protein A                                         | ENSG00000159055 | -1.401 | 2.20E-03 |
| <i>MKI67</i>       | marker of proliferation Ki-67                                       | ENSG00000148773 | -1.705 | 2.50E-05 |
| <i>MLLT1</i>       | MLLT1 super elongation complex subunit                              | ENSG00000130382 | 0.833  | 3.50E-02 |
| <i>MLPH</i>        | melanophilin                                                        | ENSG00000115648 | -3.937 | 7.80E-08 |
| <i>MMP15</i>       | matrix metalloproteinase 15                                         | ENSG00000102996 | 0.964  | 2.60E-02 |
| <i>MORF4L2-AS1</i> | MORF4L2 antisense RNA 1                                             | ENSG00000231154 | 1.979  | 8.30E-03 |
| <i>MPP3</i>        | membrane palmitoylated protein 3                                    | ENSG00000161647 | -1.176 | 2.60E-02 |
| <i>MTCO2P12</i>    |                                                                     | ENSG00000229344 | 2.997  | 2.00E-02 |
| <i>MTFP1</i>       | mitochondrial fission process 1                                     | ENSG00000242114 | -1.565 | 1.90E-02 |
| <i>MTHFD1L</i>     | methylenetetrahydrofolate dehydrogenase (NADP+ dependent) 1 like    | ENSG00000120254 | 0.905  | 2.40E-02 |
| <i>MXRA5</i>       | matrix remodeling associated 5                                      | ENSG00000101825 | 2.180  | 1.50E-07 |
| <i>MXRA5Y</i>      | matrix remodeling associated 5 Y-linked (pseudogene)                | ENSG00000235649 | 2.004  | 4.20E-02 |
| <i>MYBL1</i>       | MYB proto-oncogene like 1                                           | ENSG00000185697 | -1.287 | 5.10E-03 |
| <i>MYBL2</i>       | MYB proto-oncogene like 2                                           | ENSG00000101057 | -1.186 | 3.90E-03 |
| <i>MYEOV</i>       | myeloma overexpressed                                               | ENSG00000172927 | -1.810 | 4.20E-02 |
| <i>MYLK2</i>       | myosin light chain kinase 2                                         | ENSG00000101306 | -2.015 | 2.10E-02 |
| <i>MYRIP</i>       | myosin VIIA and Rab interacting protein                             | ENSG00000170011 | 1.323  | 1.20E-02 |
| <i>N4BP3</i>       | NEDD4 binding protein 3                                             | ENSG00000145911 | 2.478  | 2.80E-02 |
| <i>NAALADL2</i>    | N-acetylated alpha-linked acidic dipeptidase like 2                 | ENSG00000177694 | 1.314  | 2.20E-02 |
| <i>NAV2</i>        | neuron navigator 2                                                  | ENSG00000166833 | -1.277 | 5.50E-03 |
| <i>NCAPD2</i>      | non-SMC condensin I complex subunit D2                              | ENSG00000010292 | -0.998 | 1.20E-02 |
| <i>NCAPG</i>       | non-SMC condensin I complex subunit G                               | ENSG00000109805 | -1.328 | 1.30E-03 |
| <i>NCAPG2</i>      | non-SMC condensin II complex subunit G2                             | ENSG00000146918 | -1.272 | 2.10E-03 |
| <i>NCAPH</i>       | non-SMC condensin I complex subunit H                               | ENSG00000121152 | -1.163 | 9.80E-03 |
| <i>NDC80</i>       | NDC80 kinetochore complex component                                 | ENSG00000080986 | -1.647 | 1.50E-04 |
| <i>NDE1</i>        | nudE neurodevelopment protein 1                                     | ENSG00000072864 | -0.885 | 2.80E-02 |
| <i>NDST3</i>       | N-deacetylase and N-sulfotransferase 3                              | ENSG00000164100 | 1.074  | 3.30E-02 |
| <i>NEAT1</i>       | nuclear paraspeckle assembly transcript 1                           | ENSG00000245532 | 1.108  | 5.30E-03 |
| <i>NEBL</i>        | nebulin                                                             | ENSG00000078114 | 2.394  | 4.60E-05 |
| <i>NECTIN1</i>     | nectin cell adhesion molecule 1                                     | ENSG00000110400 | -0.852 | 3.60E-02 |
| <i>NEFL</i>        | neurofilament light                                                 | ENSG00000277586 | -1.175 | 1.10E-02 |
| <i>NEGR1</i>       | neuronal growth regulator 1                                         | ENSG00000172260 | 1.099  | 7.70E-03 |

|                   |                                                                   |                 |        |          |
|-------------------|-------------------------------------------------------------------|-----------------|--------|----------|
| <i>NEK2</i>       | NIMA related kinase 2                                             | ENSG00000117650 | -1.525 | 9.80E-04 |
| <i>NEURL1B</i>    | neuralized E3 ubiquitin protein ligase 1B                         | ENSG00000214357 | -1.421 | 1.50E-03 |
| <i>NIPAL1</i>     | NIPA like domain containing 1                                     | ENSG00000163293 | -1.321 | 2.80E-02 |
| <i>NKD2</i>       | NKD inhibitor of WNT signaling pathway 2                          | ENSG00000145506 | 1.366  | 1.60E-02 |
| <i>NPY</i>        | neuropeptide Y                                                    | ENSG00000122585 | 1.834  | 9.00E-04 |
| <i>NPY1R</i>      | neuropeptide Y receptor Y1                                        | ENSG00000164128 | 2.470  | 5.80E-09 |
| <i>NPY5R</i>      | neuropeptide Y receptor Y5                                        | ENSG00000164129 | 1.587  | 2.90E-03 |
| <i>NR4A2</i>      | nuclear receptor subfamily 4 group A member 2                     | ENSG00000153234 | 2.796  | 3.40E-09 |
| <i>NR4A3</i>      | nuclear receptor subfamily 4 group A member 3                     | ENSG00000119508 | 2.022  | 8.30E-03 |
| <i>NRGN</i>       | neurogranin                                                       | ENSG00000154146 | -1.235 | 8.00E-03 |
| <i>NSD2</i>       | nuclear receptor binding SET domain protein 2                     | ENSG00000109685 | -0.818 | 3.90E-02 |
| <i>NT5E</i>       | 5'-nucleotidase ecto                                              | ENSG00000135318 | -0.985 | 1.40E-02 |
| <i>NTAN1</i>      | N-terminal asparagine amidase                                     | ENSG00000157045 | -0.903 | 2.90E-02 |
| <i>NTNG2</i>      | netrin G2                                                         | ENSG00000196358 | 0.928  | 4.50E-02 |
| <i>NUF2</i>       | NUF2 component of NDC80 kinetochore complex                       | ENSG00000143228 | -1.936 | 1.60E-05 |
| <i>NUSAP1</i>     | nucleolar and spindle associated protein 1                        | ENSG00000137804 | -1.486 | 3.20E-04 |
| <i>OCIAD1-AS1</i> | OCIAD1 antisense RNA 1                                            | ENSG00000248256 | 2.737  | 3.30E-02 |
| <i>OIP5</i>       | Opa interacting protein 5                                         | ENSG00000104147 | -1.388 | 1.10E-02 |
| <i>OLFML2A</i>    | olfactomedin like 2A                                              | ENSG00000185585 | -1.517 | 4.50E-04 |
| <i>ORC6</i>       | origin recognition complex subunit 6                              | ENSG00000091651 | -1.478 | 8.20E-04 |
| <i>OSGIN2</i>     | oxidative stress induced growth inhibitor family member 2         | ENSG00000164823 | 0.884  | 2.80E-02 |
| <i>PAM</i>        | peptidylglycine alpha-amidating monooxygenase                     | ENSG00000145730 | 0.877  | 2.70E-02 |
| <i>PAMR1</i>      | peptidase domain containing associated with muscle regeneration 1 | ENSG00000149090 | 2.797  | 9.00E-03 |
| <i>PAQR4</i>      | progesterone and adipoQ receptor family member 4                  | ENSG00000162073 | -1.177 | 6.20E-03 |
| <i>PARP2</i>      | poly(ADP-ribose) polymerase 2                                     | ENSG00000129484 | -0.885 | 3.70E-02 |
| <i>PASK</i>       | PAS domain containing serine/threonine kinase                     | ENSG00000115687 | -1.120 | 1.10E-02 |
| <i>PBK</i>        | PDZ binding kinase                                                | ENSG00000168078 | -1.467 | 7.10E-04 |
| <i>PBX1</i>       | PBX homeobox 1                                                    | ENSG00000185630 | 1.233  | 2.20E-03 |
| <i>PCAT6</i>      | prostate cancer associated transcript 6                           | ENSG00000228288 | 1.355  | 2.70E-02 |
| <i>PCAT7</i>      | prostate cancer associated transcript 7                           | ENSG00000231806 | 2.997  | 2.00E-02 |
| <i>PCDH1</i>      | protocadherin 1                                                   | ENSG00000156453 | -1.195 | 1.70E-02 |
| <i>PCK2</i>       | phosphoenolpyruvate carboxykinase 2, mitochondrial                | ENSG00000100889 | -1.142 | 8.60E-03 |
| <i>PCNA</i>       | proliferating cell nuclear antigen                                | ENSG00000132646 | -0.821 | 4.00E-02 |
| <i>PCSK4</i>      | proprotein convertase subtilisin/kexin type 4                     | ENSG00000115257 | 1.452  | 1.30E-02 |
| <i>PDE1A</i>      | phosphodiesterase 1A                                              | ENSG00000115252 | 3.117  | 1.40E-03 |
| <i>PDE3A</i>      | phosphodiesterase 3A                                              | ENSG00000172572 | 1.895  | 1.30E-02 |
| <i>PDE4B</i>      | phosphodiesterase 4B                                              | ENSG00000184588 | 2.071  | 1.70E-04 |
| <i>PDE4D</i>      | phosphodiesterase 4D                                              | ENSG00000113448 | 2.135  | 8.30E-06 |
| <i>PDE7B</i>      | phosphodiesterase 7B                                              | ENSG00000171408 | 3.286  | 4.30E-12 |
| <i>PDGFD</i>      | platelet derived growth factor D                                  | ENSG00000170962 | 1.704  | 4.90E-05 |
| <i>PDLIM4</i>     | PDZ and LIM domain 4                                              | ENSG00000131435 | -1.460 | 1.10E-03 |

|                 |                                                                     |                 |        |          |
|-----------------|---------------------------------------------------------------------|-----------------|--------|----------|
| <i>PDZRN3</i>   | PDZ domain containing ring finger 3                                 | ENSG00000121440 | 1.083  | 3.80E-02 |
| <i>PGRMC2</i>   | progesterone receptor membrane component 2                          | ENSG00000164040 | 1.024  | 1.10E-02 |
| <i>PHF19</i>    | PHD finger protein 19                                               | ENSG00000119403 | -0.933 | 2.20E-02 |
| <i>PHGDH</i>    | phosphoglycerate dehydrogenase                                      | ENSG00000092621 | -1.213 | 2.60E-03 |
| <i>PI16</i>     | peptidase inhibitor 16                                              | ENSG00000164530 | 2.143  | 3.90E-06 |
| <i>PIF1</i>     | PIF1 5'-to-3' DNA helicase                                          | ENSG00000140451 | -1.155 | 1.20E-02 |
| <i>PIK3IP1</i>  | phosphoinositide-3-kinase interacting protein 1                     | ENSG00000100100 | 0.948  | 4.50E-02 |
| <i>PIMREG</i>   | PICALM interacting mitotic regulator                                | ENSG00000129195 | -1.595 | 1.80E-04 |
| <i>PITPNM3</i>  | PITPNM family member 3                                              | ENSG00000091622 | -0.867 | 3.10E-02 |
| <i>PITX2</i>    | paired like homeodomain 2                                           | ENSG00000164093 | 1.646  | 7.30E-03 |
| <i>PKMYT1</i>   | protein kinase, membrane associated tyrosine/threonine 1            | ENSG00000127564 | -1.296 | 2.00E-03 |
| <i>PKN3</i>     | protein kinase N3                                                   | ENSG00000160447 | -0.961 | 3.20E-02 |
| <i>PKP2</i>     | plakophilin 2                                                       | ENSG00000057294 | 0.851  | 3.60E-02 |
| <i>PLA2G4C</i>  | phospholipase A2 group IVC                                          | ENSG00000105499 | 1.481  | 3.80E-02 |
| <i>PLAT</i>     | plasminogen activator, tissue type                                  | ENSG00000104368 | -1.791 | 1.00E-04 |
| <i>PLAU</i>     | plasminogen activator, urokinase                                    | ENSG00000122861 | -1.045 | 8.30E-03 |
| <i>PLAUR</i>    | plasminogen activator, urokinase receptor                           | ENSG00000011422 | -0.952 | 2.10E-02 |
| <i>PLCL1</i>    | phospholipase C like 1 (inactive)                                   | ENSG00000115896 | 2.028  | 1.30E-03 |
| <i>PLCXD3</i>   | phosphatidylinositol specific phospholipase C X domain containing 3 | ENSG00000182836 | -0.945 | 4.80E-02 |
| <i>PLEK2</i>    | pleckstrin 2                                                        | ENSG00000100558 | -1.366 | 3.30E-03 |
| <i>PLEKHA2</i>  | pleckstrin homology domain containing A2                            | ENSG00000169499 | 1.445  | 4.00E-04 |
| <i>PLK1</i>     | polo like kinase 1                                                  | ENSG00000166851 | -1.614 | 9.20E-05 |
| <i>PLK4</i>     | polo like kinase 4                                                  | ENSG00000142731 | -1.051 | 2.20E-02 |
| <i>PLOD2</i>    | procollagen-lysine,2-oxoglutarate 5-dioxygenase 2                   | ENSG00000152952 | 1.666  | 3.40E-05 |
| <i>PLSCR4</i>   | phospholipid scramblase 4                                           | ENSG00000114698 | 0.821  | 4.30E-02 |
| <i>PLXNA4</i>   | plexin A4                                                           | ENSG00000221866 | -1.122 | 1.50E-02 |
| <i>PLXNB3</i>   | plexin B3                                                           | ENSG00000198753 | 0.974  | 2.10E-02 |
| <i>PMAIP1</i>   | phorbol-12-myristate-13-acetate-induced protein 1                   | ENSG00000141682 | -0.938 | 2.70E-02 |
| <i>PMEL</i>     | premelanosome protein                                               | ENSG00000185664 | -1.071 | 2.70E-02 |
| <i>PNP</i>      | purine nucleoside phosphorylase                                     | ENSG00000198805 | -0.879 | 4.30E-02 |
| <i>POC1A</i>    | POC1 centriolar protein A                                           | ENSG00000164087 | -1.095 | 1.30E-02 |
| <i>PODXL</i>    | podocalyxin like                                                    | ENSG00000128567 | -1.731 | 3.00E-05 |
| <i>POLA1</i>    | DNA polymerase alpha 1, catalytic subunit                           | ENSG00000101868 | -0.968 | 2.70E-02 |
| <i>POLD1</i>    | DNA polymerase delta 1, catalytic subunit                           | ENSG00000062822 | -0.922 | 2.50E-02 |
| <i>POLE</i>     | DNA polymerase epsilon, catalytic subunit                           | ENSG00000177084 | -0.824 | 4.50E-02 |
| <i>POLQ</i>     | DNA polymerase theta                                                | ENSG00000051341 | -1.428 | 2.60E-03 |
| <i>POLRMTP1</i> | RNA polymerase mitochondrial pseudogene 1                           | ENSG00000266066 | 2.552  | 9.50E-04 |
| <i>PPIAP46</i>  | peptidylprolyl isomerase A pseudogene 46                            | ENSG00000260266 | 3.173  | 9.80E-04 |
| <i>PPIAP53</i>  | peptidylprolyl isomerase A pseudogene 53                            | ENSG00000223878 | 1.834  | 4.20E-02 |
| <i>PPP1R15A</i> | protein phosphatase 1 regulatory subunit 15A                        | ENSG00000087074 | -0.789 | 5.00E-02 |

|                 |                                                                          |                 |        |          |
|-----------------|--------------------------------------------------------------------------|-----------------|--------|----------|
| <i>PPP1R32</i>  | protein phosphatase 1 regulatory subunit 32                              | ENSG00000162148 | 3.217  | 7.80E-03 |
| <i>PRC1</i>     | protein regulator of cytokinesis 1                                       | ENSG00000198901 | -1.491 | 2.40E-04 |
| <i>PRC1-AS1</i> | PRC1 antisense RNA 1                                                     | ENSG00000258725 | -1.664 | 1.50E-04 |
| <i>PRDM8</i>    | PR/SET domain 8                                                          | ENSG00000152784 | -1.276 | 1.10E-02 |
| <i>PREX1</i>    | phosphatidylinositol-3,4,5-trisphosphate dependent Rac exchange factor 1 | ENSG00000124126 | -1.079 | 2.40E-02 |
| <i>PRKN</i>     | parkin RBR E3 ubiquitin protein ligase                                   | ENSG00000185345 | 1.481  | 3.80E-02 |
| <i>PRR11</i>    | proline rich 11                                                          | ENSG00000068489 | -1.426 | 6.10E-04 |
| <i>PRRT3</i>    | proline rich transmembrane protein 3                                     | ENSG00000163704 | 0.997  | 2.80E-02 |
| <i>PRSS2</i>    | serine protease 2                                                        | ENSG00000275896 | -0.980 | 4.70E-02 |
| <i>PRUNE2</i>   | prune homolog 2 with BCH domain                                          | ENSG00000106772 | 0.917  | 2.10E-02 |
| <i>PSAT1</i>    | phosphoserine aminotransferase 1                                         | ENSG00000135069 | -1.287 | 1.60E-03 |
| <i>PSD3</i>     | pleckstrin and Sec7 domain containing 3                                  | ENSG00000156011 | 0.899  | 2.20E-02 |
| <i>PSRC1</i>    | proline and serine rich coiled-coil 1                                    | ENSG00000134222 | -1.591 | 3.90E-04 |
| <i>PTGS2</i>    | prostaglandin-endoperoxide synthase 2                                    | ENSG00000073756 | 1.253  | 8.00E-03 |
| <i>PTP4A1</i>   | protein tyrosine phosphatase 4A1                                         | ENSG00000112245 | 0.893  | 2.50E-02 |
| <i>PTPDC1</i>   | protein tyrosine phosphatase domain containing 1                         | ENSG00000158079 | -1.233 | 1.30E-02 |
| <i>PTPRN</i>    | protein tyrosine phosphatase receptor type N                             | ENSG00000054356 | 3.267  | 4.00E-05 |
| <i>PTPRR</i>    | protein tyrosine phosphatase receptor type R                             | ENSG00000153233 | 2.153  | 8.50E-03 |
| <i>PTTG1</i>    | PTTG1 regulator of sister chromatid separation, securin                  | ENSG00000164611 | -1.387 | 1.30E-03 |
| <i>QPRT</i>     | quinolinate phosphoribosyltransferase                                    | ENSG00000103485 | 2.737  | 3.30E-02 |
| <i>RAB3A</i>    | RAB3A, member RAS oncogene family                                        | ENSG00000105649 | 2.442  | 2.30E-04 |
| <i>RACGAP1</i>  | Rac GTPase activating protein 1                                          | ENSG00000161800 | -1.426 | 5.90E-04 |
| <i>RAD51</i>    | RAD51 recombinase                                                        | ENSG00000051180 | -1.527 | 1.50E-03 |
| <i>RAD51AP1</i> | RAD51 associated protein 1                                               | ENSG00000111247 | -1.689 | 3.10E-04 |
| <i>RALGAP2</i>  | Ral GTPase activating protein catalytic alpha subunit 2                  | ENSG00000188559 | 0.892  | 4.10E-02 |
| <i>RASD1</i>    | ras related dexamethasone induced 1                                      | ENSG00000108551 | 2.921  | 3.40E-10 |
| <i>RASD2</i>    | RASD family member 2                                                     | ENSG00000100302 | -1.353 | 2.90E-02 |
| <i>RASL11B</i>  | RAS like family 11 member B                                              | ENSG00000128045 | 2.027  | 3.00E-04 |
| <i>RASSF10</i>  | Ras association domain family member 10                                  | ENSG00000189431 | -2.834 | 7.80E-03 |
| <i>RASSF8</i>   | Ras association domain family member 8                                   | ENSG00000123094 | 0.900  | 2.80E-02 |
| <i>RBL1</i>     | RB transcriptional corepressor like 1                                    | ENSG00000080839 | -1.350 | 2.50E-03 |
| <i>RBM7</i>     | RNA binding motif protein 7                                              | ENSG00000076053 | 0.827  | 4.80E-02 |
| <i>RECQL4</i>   | RecQ like helicase 4                                                     | ENSG00000160957 | -1.041 | 1.10E-02 |
| <i>REPS2</i>    | RALBP1 associated Eps domain containing 2                                | ENSG00000169891 | 1.121  | 2.20E-02 |
| <i>RFC2</i>     | replication factor C subunit 2                                           | ENSG00000049541 | -1.223 | 1.00E-02 |
| <i>RFC3</i>     | replication factor C subunit 3                                           | ENSG00000133119 | -1.150 | 6.90E-03 |
| <i>RGMB</i>     | repulsive guidance molecule BMP co-receptor b                            | ENSG00000174136 | -0.880 | 3.00E-02 |
| <i>RGMB-AS1</i> | RGMB antisense RNA 1                                                     | ENSG00000246763 | -1.545 | 9.90E-03 |
| <i>RGS2</i>     | regulator of G protein signaling 2                                       | ENSG00000116741 | 1.819  | 1.80E-05 |
| <i>RHBDL3</i>   | rhomboid like 3                                                          | ENSG00000141314 | -1.325 | 1.60E-02 |
| <i>RHOU</i>     | ras homolog family member U                                              | ENSG00000116574 | 1.984  | 4.20E-06 |
| <i>RIN1</i>     | Ras and Rab interactor 1                                                 | ENSG00000174791 | -0.845 | 4.70E-02 |
| <i>RNASEH2A</i> | ribonuclease H2 subunit A                                                | ENSG00000104889 | -1.146 | 5.80E-03 |
| <i>RND2</i>     | Rho family GTPase 2                                                      | ENSG00000108830 | 1.455  | 2.30E-02 |

|                       |                                |                 |        |          |
|-----------------------|--------------------------------|-----------------|--------|----------|
| <i>RNF150</i>         | ring finger protein 150        | ENSG00000170153 | 2.004  | 4.20E-02 |
| <i>RNF152</i>         | ring finger protein 152        | ENSG00000176641 | -2.145 | 3.90E-02 |
| <i>ROBO1</i>          | roundabout guidance receptor 1 | ENSG00000169855 | 1.065  | 7.50E-03 |
| <i>ROBO4</i>          | roundabout guidance receptor 4 | ENSG00000154133 | -6.586 | 2.30E-03 |
| <i>RP11-753C18.12</i> |                                | ENSG00000282772 | 1.279  | 2.10E-02 |
| <i>RP11_1167A192</i>  |                                | ENSG00000255038 | 2.306  | 1.50E-02 |
| <i>RP11_120D51</i>    |                                | ENSG00000234129 | -2.282 | 1.70E-02 |
| <i>RP11_120K92</i>    |                                | ENSG00000259684 | 3.111  | 1.30E-02 |
| <i>RP11_142E91</i>    |                                | ENSG00000276672 | -2.145 | 3.90E-02 |
| <i>RP11_158H57</i>    |                                | ENSG00000268573 | 3.111  | 1.30E-02 |
| <i>RP11_161H235</i>   |                                | ENSG00000258232 | -1.166 | 3.70E-03 |
| <i>RP11_19P228</i>    |                                | ENSG00000266872 | 2.341  | 2.40E-06 |
| <i>RP11_229P1322</i>  |                                | ENSG00000229257 | -2.008 | 2.80E-02 |
| <i>RP11_229P1323</i>  |                                | ENSG00000231864 | -1.044 | 2.70E-02 |
| <i>RP11_22B231</i>    |                                | ENSG00000111788 | -1.263 | 3.10E-02 |
| <i>RP11_234A11</i>    |                                | ENSG00000242299 | -1.225 | 4.10E-02 |
| <i>RP11_240G225</i>   |                                | ENSG00000274554 | 2.052  | 7.00E-03 |
| <i>RP11_301L82</i>    |                                | ENSG00000233110 | 3.091  | 2.10E-05 |
| <i>RP11_304L198</i>   |                                | ENSG00000261532 | -1.164 | 1.80E-02 |
| <i>RP11_334A148</i>   |                                | ENSG00000235563 | 2.737  | 3.30E-02 |
| <i>RP11_334C175</i>   |                                | ENSG00000262580 | 1.328  | 1.60E-02 |
| <i>RP11_33N143</i>    |                                | ENSG00000277873 | -1.225 | 4.10E-02 |
| <i>RP11_344B22</i>    |                                | ENSG00000264982 | 1.964  | 3.40E-04 |
| <i>RP11_344N102</i>   |                                | ENSG00000237768 | 1.121  | 2.40E-02 |
| <i>RP11_399B171</i>   |                                | ENSG00000278962 | -1.916 | 3.00E-02 |
| <i>RP11_424C202</i>   |                                | ENSG00000256663 | -1.918 | 4.40E-03 |
| <i>RP11_435D73</i>    |                                | ENSG00000232335 | -1.221 | 4.40E-02 |
| <i>RP11_443B201</i>   |                                | ENSG00000271936 | -1.336 | 2.20E-02 |
| <i>RP11_454L92</i>    |                                | ENSG00000259318 | 2.737  | 3.30E-02 |
| <i>RP11_459E51</i>    |                                | ENSG00000253125 | -1.218 | 3.00E-02 |
| <i>RP11_489E74</i>    |                                | ENSG00000272256 | 0.793  | 5.00E-02 |
| <i>RP11_495O111</i>   |                                | ENSG00000255091 | -1.916 | 3.00E-02 |
| <i>RP11_517C164</i>   |                                | ENSG00000261243 | -1.895 | 3.30E-03 |
| <i>RP11_527N222</i>   |                                | ENSG00000253746 | -2.024 | 9.40E-03 |
| <i>RP11_544A128</i>   |                                | ENSG00000246851 | 1.834  | 4.20E-02 |
| <i>RP11_54O716</i>    |                                | ENSG00000272438 | 2.004  | 4.20E-02 |
| <i>RP11_613D138</i>   |                                | ENSG00000244953 | 2.193  | 2.90E-03 |
| <i>RP11_626E131</i>   |                                | ENSG00000235902 | 2.737  | 3.30E-02 |
| <i>RP11_65L32</i>     |                                | ENSG00000270277 | -2.282 | 1.70E-02 |
| <i>RP11_67L35</i>     |                                | ENSG00000242396 | 0.986  | 1.50E-02 |
| <i>RP11_76K133</i>    |                                | ENSG00000264475 | 1.903  | 3.10E-02 |
| <i>RP11_843B152</i>   |                                | ENSG00000257530 | 1.562  | 1.00E-02 |
| <i>RP11_847H182</i>   |                                | ENSG00000245482 | -3.739 | 7.80E-03 |
| <i>RP11_84A193</i>    |                                | ENSG00000254545 | -1.235 | 1.80E-02 |
| <i>RP11_873E201</i>   |                                | ENSG00000267397 | 1.397  | 6.90E-03 |
| <i>RP11_876N243</i>   |                                | ENSG00000280153 | 3.217  | 7.80E-03 |
| <i>RP11_927P214</i>   |                                | ENSG00000265982 | 6.130  | 6.90E-03 |
| <i>RP13_977J115</i>   |                                | ENSG00000256804 | -1.883 | 4.10E-02 |
| <i>RP1_228H135</i>    |                                | ENSG00000260920 | -1.773 | 3.10E-03 |
| <i>RP1_266L202</i>    |                                | ENSG00000232640 | 3.515  | 1.20E-04 |
| <i>RP1_292L203</i>    |                                | ENSG00000274818 | 2.163  | 2.10E-02 |
| <i>RP3_329A58</i>     |                                | ENSG00000272374 | 2.873  | 2.00E-02 |
| <i>RP3_368A46</i>     |                                | ENSG00000271533 | 1.834  | 4.20E-02 |



|                     |                                                                      |                 |        |          |
|---------------------|----------------------------------------------------------------------|-----------------|--------|----------|
| <i>RP4_536B242</i>  |                                                                      | ENSG00000260466 | -1.156 | 1.30E-02 |
| <i>RP4_694A72</i>   |                                                                      | ENSG00000233589 | -1.263 | 3.10E-02 |
| <i>RP5_832C25</i>   |                                                                      | ENSG00000215014 | 2.873  | 2.00E-02 |
| <i>RP5_875H189</i>  |                                                                      | ENSG00000276851 | -1.938 | 2.20E-02 |
| <i>RPL15P3</i>      | ribosomal protein L15 pseudogene 3                                   | ENSG00000212802 | -1.389 | 3.80E-02 |
| <i>RPS6KA2</i>      | ribosomal protein S6 kinase A2                                       | ENSG00000071242 | 1.058  | 1.20E-02 |
| <i>RRAD</i>         | RRAD, Ras related glycolysis inhibitor and calcium channel regulator | ENSG00000166592 | -2.285 | 1.10E-07 |
| <i>RRM1</i>         | ribonucleotide reductase catalytic subunit M1                        | ENSG00000167325 | -0.810 | 4.40E-02 |
| <i>RRM2</i>         | ribonucleotide reductase regulatory subunit M2                       | ENSG00000171848 | -1.171 | 3.80E-03 |
| <i>RTN4RL2</i>      | reticulon 4 receptor like 2                                          | ENSG00000186907 | 6.708  | 7.70E-04 |
| <i>S100A2</i>       | S100 calcium binding protein A2                                      | ENSG00000196754 | -0.980 | 2.50E-02 |
| <i>S1PR3</i>        | sphingosine-1-phosphate receptor 3                                   | ENSG00000213694 | 1.146  | 4.50E-03 |
| <i>SAPCD2</i>       | suppressor APC domain containing 2                                   | ENSG00000186193 | -1.274 | 2.60E-03 |
| <i>SAT1</i>         | spermidine/spermine N1-acetyltransferase 1                           | ENSG00000130066 | 1.142  | 4.90E-03 |
| <i>SBSPON</i>       | somatomedin B and thrombospondin type 1 domain containing            | ENSG00000164764 | 1.822  | 1.60E-04 |
| <i>SCARA3</i>       | scavenger receptor class A member 3                                  | ENSG00000168077 | -1.628 | 1.20E-04 |
| <i>SCG2</i>         | secretogranin II                                                     | ENSG00000171951 | 1.944  | 3.30E-06 |
| <i>SCLY</i>         | selenocysteine lyase                                                 | ENSG00000132330 | -1.524 | 3.10E-02 |
| <i>SCN2A</i>        | sodium voltage-gated channel alpha subunit 2                         | ENSG00000136531 | -1.916 | 3.00E-02 |
| <i>SEMA3C</i>       | semaphorin 3C                                                        | ENSG00000075223 | 1.046  | 9.20E-03 |
| <i>SEMA3D</i>       | semaphorin 3D                                                        | ENSG00000153993 | 1.979  | 8.30E-03 |
| <i>SEMA3F</i>       | semaphorin 3F                                                        | ENSG00000001617 | 1.050  | 2.50E-02 |
| <i>SEMA6D</i>       | semaphorin 6D                                                        | ENSG00000137872 | 1.122  | 1.20E-02 |
| <i>SERPINE1</i>     | serpin family E member 1                                             | ENSG00000106366 | -1.431 | 3.20E-04 |
| <i>SFMBT1</i>       | Scm like with four mbt domains 1                                     | ENSG00000163935 | -1.325 | 1.60E-02 |
| <i>SFMBT2</i>       | Scm like with four mbt domains 2                                     | ENSG00000198879 | 1.839  | 1.70E-02 |
| <i>SFRP1</i>        | secreted frizzled related protein 1                                  | ENSG00000104332 | 1.806  | 2.20E-05 |
| <i>SGK1</i>         | serum/glucocorticoid regulated kinase 1                              | ENSG00000118515 | 0.799  | 4.50E-02 |
| <i>SGO1</i>         | shugoshin 1                                                          | ENSG00000129810 | -1.375 | 5.80E-03 |
| <i>SGO2</i>         | shugoshin 2                                                          | ENSG00000163535 | -0.955 | 3.20E-02 |
| <i>SHC4</i>         | SHC adaptor protein 4                                                | ENSG00000185634 | 1.286  | 2.10E-02 |
| <i>SHCBP1</i>       | SHC binding and spindle associated 1                                 | ENSG00000171241 | -1.605 | 1.50E-04 |
| <i>SIDT2</i>        | SID1 transmembrane family member 2                                   | ENSG00000149577 | 0.922  | 2.40E-02 |
| <i>SIGLEC15</i>     | sialic acid binding Ig like lectin 15                                | ENSG00000197046 | -1.651 | 4.80E-03 |
| <i>SIPA1L1</i>      | signal induced proliferation associated 1 like 1                     | ENSG00000197555 | 0.898  | 2.60E-02 |
| <i>SKA1</i>         | spindle and kinetochore associated complex subunit 1                 | ENSG00000154839 | -2.344 | 3.00E-06 |
| <i>SKA3</i>         | spindle and kinetochore associated complex subunit 3                 | ENSG00000165480 | -1.492 | 1.10E-03 |
| <i>SKIDA1</i>       | SKI/DACH domain containing 1                                         | ENSG00000180592 | 1.839  | 1.70E-02 |
| <i>SKP2</i>         | S-phase kinase associated protein 2                                  | ENSG00000145604 | -0.985 | 2.40E-02 |
| <i>SLC14A1</i>      | solute carrier family 14 member 1 (Kidd blood group)                 | ENSG00000141469 | -1.422 | 6.40E-04 |
| <i>SLC1A3</i>       | solute carrier family 1 member 3                                     | ENSG00000079215 | 3.255  | 3.10E-09 |
| <i>SLC1A7</i>       | solute carrier family 1 member 7                                     | ENSG00000162383 | 1.698  | 6.50E-03 |
| <i>SLC25A30-AS1</i> | SLC25A30 antisense RNA 1                                             | ENSG00000251015 | 1.719  | 3.10E-02 |

|                    |                                                                 |                 |        |          |
|--------------------|-----------------------------------------------------------------|-----------------|--------|----------|
| <i>SLC25A40</i>    | solute carrier family 25 member 40                              | ENSG00000075303 | -1.016 | 4.40E-02 |
| <i>SLC26A2</i>     | solute carrier family 26 member 2                               | ENSG00000155850 | 0.863  | 3.00E-02 |
| <i>SLC27A3</i>     | solute carrier family 27 member 3                               | ENSG00000143554 | -1.400 | 3.60E-02 |
| <i>SLC29A1</i>     | solute carrier family 29 member 1 (Augustine blood group)       | ENSG00000112759 | -0.951 | 2.00E-02 |
| <i>SLC2A12</i>     | solute carrier family 2 member 12                               | ENSG00000146411 | 2.210  | 6.20E-03 |
| <i>SLC35G1</i>     | solute carrier family 35 member G1                              | ENSG00000176273 | -6.722 | 1.30E-03 |
| <i>SLC40A1</i>     | solute carrier family 40 member 1                               | ENSG00000138449 | 2.063  | 6.00E-05 |
| <i>SLC43A3</i>     | solute carrier family 43 member 3                               | ENSG00000134802 | -1.242 | 3.80E-03 |
| <i>SLC44A3</i>     | solute carrier family 44 member 3                               | ENSG00000143036 | 1.135  | 2.00E-02 |
| <i>SLC44A3-AS1</i> | SLC44A3 antisense RNA 1                                         | ENSG00000224081 | 1.376  | 1.80E-02 |
| <i>SLC44A5</i>     | solute carrier family 44 member 5                               | ENSG00000137968 | -1.447 | 4.10E-02 |
| <i>SLC46A1</i>     | solute carrier family 46 member 1                               | ENSG00000076351 | 0.953  | 2.30E-02 |
| <i>SLC4A4</i>      | solute carrier family 4 member 4                                | ENSG00000080493 | 0.892  | 4.70E-02 |
| <i>SLC4A5</i>      | solute carrier family 4 member 5                                | ENSG00000188687 | -1.688 | 4.90E-03 |
| <i>SLC6A17</i>     | solute carrier family 6 member 17                               | ENSG00000197106 | -2.034 | 1.00E-03 |
| <i>SLC7A5</i>      | solute carrier family 7 member 5                                | ENSG00000103257 | -0.877 | 2.80E-02 |
| <i>SLC8A1</i>      | solute carrier family 8 member A1                               | ENSG00000183023 | -1.559 | 2.60E-03 |
| <i>SLC8A1-AS1</i>  | SLC8A1 antisense RNA 1                                          | ENSG00000227028 | -2.698 | 1.30E-02 |
| <i>SLF1</i>        | SMC5-SMC6 complex localization factor 1                         | ENSG00000133302 | -0.997 | 4.30E-02 |
| <i>SLFN12L</i>     | schlafen family member 12 like                                  | ENSG00000205045 | 1.903  | 3.10E-02 |
| <i>SLIT2</i>       | slit guidance ligand 2                                          | ENSG00000145147 | 1.504  | 2.00E-04 |
| <i>SLITRK4</i>     | SLIT and NTRK like family member 4                              | ENSG00000179542 | 1.016  | 1.40E-02 |
| <i>SMAGP</i>       | small cell adhesion glycoprotein                                | ENSG00000170545 | -0.897 | 3.50E-02 |
| <i>SMC2</i>        | structural maintenance of chromosomes 2                         | ENSG00000136824 | -0.989 | 1.70E-02 |
| <i>SMC4</i>        | structural maintenance of chromosomes 4                         | ENSG00000113810 | -1.167 | 3.60E-03 |
| <i>SMC6</i>        | structural maintenance of chromosomes 6                         | ENSG00000163029 | -1.095 | 9.20E-03 |
| <i>SMPD3</i>       | sphingomyelin phosphodiesterase 3                               | ENSG00000103056 | 1.244  | 4.00E-03 |
| <i>SMTN</i>        | smoothelin                                                      | ENSG00000183963 | -0.894 | 5.00E-02 |
| <i>SNAI3</i>       | snail family transcriptional repressor 3                        | ENSG00000185669 | 2.095  | 1.20E-02 |
| <i>SNRPGP10</i>    | small nuclear ribonucleoprotein polypeptide G pseudogene 10     | ENSG00000235363 | -1.916 | 3.00E-02 |
| <i>SORBS2</i>      | sorbin and SH3 domain containing 2                              | ENSG00000154556 | 2.165  | 4.90E-07 |
| <i>SOX6</i>        | SRY-box transcription factor 6                                  | ENSG00000110693 | -1.447 | 4.10E-02 |
| <i>SOX9</i>        | SRY-box transcription factor 9                                  | ENSG00000125398 | -1.107 | 7.80E-03 |
| <i>SPAG5</i>       | sperm associated antigen 5                                      | ENSG00000076382 | -1.326 | 1.80E-03 |
| <i>SPDL1</i>       | spindle apparatus coiled-coil protein 1                         | ENSG00000040275 | -1.390 | 7.40E-04 |
| <i>SPHK1</i>       | sphingosine kinase 1                                            | ENSG00000176170 | -2.609 | 3.30E-06 |
| <i>SPINK4</i>      | serine peptidase inhibitor, Kazal type 4                        | ENSG00000122711 | 6.266  | 3.90E-03 |
| <i>SPOCD1</i>      | SPOC domain containing 1                                        | ENSG00000134668 | -1.358 | 1.00E-03 |
| <i>SPOCK3</i>      | SPARC (osteonectin), cwcv and kazal like domains proteoglycan 3 | ENSG00000196104 | 1.049  | 1.70E-02 |
| <i>SRGN</i>        | serglycin                                                       | ENSG00000122862 | 1.169  | 1.00E-02 |
| <i>SSPO</i>        | SCO-spondin                                                     | ENSG00000197558 | 1.281  | 4.20E-02 |
| <i>ST20-MTHFS</i>  | ST20-MTHFS readthrough                                          | ENSG00000259332 | 1.970  | 2.20E-02 |
| <i>ST3GAL6-AS1</i> | ST3GAL6 antisense RNA 1                                         | ENSG00000239445 | 2.997  | 2.00E-02 |
| <i>STAR</i>        | steroidogenic acute regulatory protein                          | ENSG00000147465 | 1.736  | 3.20E-05 |
| <i>STARD5</i>      | StAR related lipid transfer domain containing 5                 | ENSG00000172345 | 1.060  | 2.80E-02 |
| <i>STBD1</i>       | starch binding domain 1                                         | ENSG00000118804 | -1.400 | 3.60E-02 |
| <i>STC1</i>        | stanniocalcin 1                                                 | ENSG00000159167 | 1.226  | 4.30E-03 |
| <i>STIL</i>        | STIL centriolar assembly protein                                | ENSG00000123473 | -1.140 | 9.60E-03 |
| <i>STMN1</i>       | stathmin 1                                                      | ENSG00000117632 | -0.915 | 2.10E-02 |

|                  |                                                                        |                 |        |          |
|------------------|------------------------------------------------------------------------|-----------------|--------|----------|
| <i>STRA6</i>     | stimulated by retinoic acid 6                                          | ENSG00000137868 | -1.507 | 1.70E-03 |
| <i>STX1A</i>     | syntaxin 1A                                                            | ENSG00000106089 | -1.291 | 3.60E-03 |
| <i>SULT1B1</i>   | sulfotransferase family 1B member 1                                    | ENSG00000173597 | 3.217  | 7.80E-03 |
| <i>SUV39H1</i>   | suppressor of variegation 3-9 homolog 1                                | ENSG00000101945 | -0.893 | 5.00E-02 |
| <i>SYBU</i>      | syntabulin                                                             | ENSG00000147642 | 1.270  | 3.10E-02 |
| <i>SYNE3</i>     | spectrin repeat containing nuclear envelope family member 3            | ENSG00000176438 | -2.569 | 9.60E-05 |
| <i>TACC3</i>     | transforming acidic coiled-coil containing protein 3                   | ENSG00000013810 | -1.389 | 6.40E-04 |
| <i>TANC2</i>     | tetratricopeptide repeat, ankyrin repeat and coiled-coil containing 2  | ENSG00000170921 | 0.809  | 4.30E-02 |
| <i>TBC1D2B</i>   | TBC1 domain family member 2B                                           | ENSG00000167202 | -0.822 | 4.40E-02 |
| <i>TBL1X</i>     | transducin beta like 1 X-linked                                        | ENSG00000101849 | 1.119  | 4.90E-03 |
| <i>TBX2</i>      | T-box transcription factor 2                                           | ENSG00000121068 | 1.543  | 2.20E-04 |
| <i>TCF19</i>     | transcription factor 19                                                | ENSG00000137310 | -1.186 | 4.10E-03 |
| <i>TCOF1</i>     | treacle ribosome biogenesis factor 1                                   | ENSG00000070814 | -0.895 | 2.70E-02 |
| <i>TEDC1</i>     | tubulin epsilon and delta complex 1                                    | ENSG00000185347 | -0.890 | 4.50E-02 |
| <i>TENM4</i>     | teneurin transmembrane protein 4                                       | ENSG00000149256 | -0.936 | 4.40E-02 |
| <i>TEX52</i>     | testis expressed 52                                                    | ENSG00000283297 | 2.997  | 2.00E-02 |
| <i>TFPI</i>      | tissue factor pathway inhibitor                                        | ENSG00000003436 | 1.030  | 1.00E-02 |
| <i>TFPI2</i>     | tissue factor pathway inhibitor 2                                      | ENSG00000105825 | 1.067  | 2.20E-02 |
| <i>TGFB2</i>     | transforming growth factor beta receptor 2                             | ENSG00000163513 | 0.822  | 3.90E-02 |
| <i>TGM2</i>      | transglutaminase 2                                                     | ENSG00000198959 | 1.195  | 3.50E-03 |
| <i>TICRR</i>     | TOPBP1 interacting checkpoint and replication regulator                | ENSG00000140534 | -1.127 | 1.00E-02 |
| <i>TIGD3</i>     | tigger transposable element derived 3                                  | ENSG00000173825 | 2.737  | 3.30E-02 |
| <i>TIMELESS</i>  | timeless circadian regulator                                           | ENSG00000111602 | -0.980 | 1.60E-02 |
| <i>TK1</i>       | thymidine kinase 1                                                     | ENSG00000167900 | -1.468 | 3.40E-04 |
| <i>TLCD2</i>     | TLC domain containing 2                                                | ENSG00000185561 | 1.119  | 4.70E-02 |
| <i>TLL1</i>      | tolloid like 1                                                         | ENSG00000038295 | 1.307  | 8.20E-03 |
| <i>TM4SF1</i>    | transmembrane 4 L six family member 1                                  | ENSG00000169908 | 1.756  | 2.20E-05 |
| <i>TM7SF2</i>    | transmembrane 7 superfamily member 2                                   | ENSG00000149809 | 1.178  | 6.20E-03 |
| <i>TMC3</i>      | transmembrane channel like 3                                           | ENSG00000188869 | 3.653  | 3.10E-03 |
| <i>TMEFF2</i>    | transmembrane protein with EGF like and two follistatin like domains 2 | ENSG00000144339 | 1.985  | 2.20E-05 |
| <i>TMEM151A</i>  | transmembrane protein 151A                                             | ENSG00000179292 | 1.495  | 5.70E-03 |
| <i>TMEM171</i>   | transmembrane protein 171                                              | ENSG00000157111 | -2.406 | 1.10E-02 |
| <i>TMEM190</i>   | transmembrane protein 190                                              | ENSG00000160472 | 1.780  | 2.30E-02 |
| <i>TMEM245</i>   | transmembrane protein 245                                              | ENSG00000106771 | 0.817  | 3.90E-02 |
| <i>TMEM25</i>    | transmembrane protein 25                                               | ENSG00000149582 | 0.867  | 4.10E-02 |
| <i>TMEM60</i>    | transmembrane protein 60                                               | ENSG00000135211 | -1.016 | 4.40E-02 |
| <i>TMPO</i>      | thymopoietin                                                           | ENSG00000120802 | -0.924 | 2.10E-02 |
| <i>TMPO-AS1</i>  | TMPO antisense RNA 1                                                   | ENSG00000257167 | -1.385 | 9.30E-04 |
| <i>TMTC1</i>     | transmembrane O-mannosyltransferase targeting cadherins 1              | ENSG00000133687 | 1.088  | 1.00E-02 |
| <i>TNFAIP8L1</i> | TNF alpha induced protein 8 like 1                                     | ENSG00000185361 | -0.913 | 3.00E-02 |
| <i>TNFRSF11A</i> | TNF receptor superfamily member 11a                                    | ENSG00000141655 | -1.077 | 2.80E-02 |
| <i>TNFRSF11B</i> | TNF receptor superfamily member 11b                                    | ENSG00000164761 | 1.475  | 2.10E-03 |
| <i>TNFRSF21</i>  | TNF receptor superfamily member 21                                     | ENSG00000146072 | 0.864  | 3.20E-02 |
| <i>TNFSF10</i>   | TNF superfamily member 10                                              | ENSG00000121858 | 1.578  | 5.30E-04 |
| <i>TOB1</i>      | transducer of ERBB2, 1                                                 | ENSG00000141232 | 1.907  | 5.90E-06 |
| <i>TOP2A</i>     | DNA topoisomerase II alpha                                             | ENSG00000131747 | -1.695 | 2.80E-05 |

|                        |                                                                  |                 |        |          |
|------------------------|------------------------------------------------------------------|-----------------|--------|----------|
| <i>TP73</i>            | tumor protein p73                                                | ENSG00000078900 | -1.689 | 1.10E-02 |
| <i>TPTEP2</i>          | TPTE pseudogene 2                                                | ENSG00000244627 | 1.637  | 2.30E-02 |
| <i>TPX2</i>            | TPX2 microtubule nucleation factor                               | ENSG00000088325 | -1.649 | 5.50E-05 |
| <i>TRAC</i>            | T cell receptor alpha constant                                   | ENSG00000277734 | -2.834 | 7.80E-03 |
| <i>TRHDE</i>           | thyrotropin releasing hormone degrading enzyme                   | ENSG00000072657 | -1.131 | 2.40E-02 |
| <i>TRIM59</i>          | tripartite motif containing 59                                   | ENSG00000213186 | -1.208 | 3.50E-03 |
| <i>TRIP13</i>          | thyroid hormone receptor interactor 13                           | ENSG00000071539 | -1.264 | 3.30E-03 |
| <i>TROAP</i>           | trophinin associated protein                                     | ENSG00000135451 | -1.705 | 1.30E-04 |
| <i>TRPC6</i>           | transient receptor potential cation channel subfamily C member 6 | ENSG00000137672 | 1.567  | 1.90E-02 |
| <i>TSPAN11</i>         | tetraspanin 11                                                   | ENSG00000110900 | 1.094  | 1.00E-02 |
| <i>TSPAN8</i>          | tetraspanin 8                                                    | ENSG00000127324 | 0.806  | 4.60E-02 |
| <i>TTC36</i>           | tetratricopeptide repeat domain 36                               | ENSG00000172425 | 2.873  | 2.00E-02 |
| <i>TTF2</i>            | transcription termination factor 2                               | ENSG00000116830 | -1.274 | 3.50E-03 |
| <i>TTK</i>             | TTK protein kinase                                               | ENSG00000112742 | -1.754 | 1.10E-04 |
| <i>TUB</i>             | TUB bipartite transcription factor                               | ENSG00000166402 | 1.299  | 3.40E-03 |
| <i>TUBA1B</i>          | tubulin alpha 1b                                                 | ENSG00000123416 | -1.233 | 1.80E-03 |
| <i>TUBA1C</i>          | tubulin alpha 1c                                                 | ENSG00000167553 | -1.229 | 2.00E-03 |
| <i>TUBB</i>            | tubulin beta class I                                             | ENSG00000196230 | -0.798 | 4.20E-02 |
| <i>TUBB4B</i>          | tubulin beta 4B class IVb                                        | ENSG00000188229 | -1.195 | 2.60E-03 |
| <i>TVP23C</i>          | trans-golgi network vesicle protein 23 homolog C                 | ENSG00000175106 | 1.360  | 9.00E-03 |
| <i>TYMS</i>            | thymidylate synthetase                                           | ENSG00000176890 | -1.178 | 3.50E-03 |
| <i>TYMSOS</i>          | TYMS opposite strand                                             | ENSG00000176912 | -1.497 | 7.90E-04 |
| <i>TYRP1</i>           | tyrosinase related protein 1                                     | ENSG00000107165 | 1.227  | 2.90E-02 |
| <i>UBE2C</i>           | ubiquitin conjugating enzyme E2 C                                | ENSG00000175063 | -1.795 | 3.00E-05 |
| <i>UBE2T</i>           | ubiquitin conjugating enzyme E2 T                                | ENSG00000077152 | -1.366 | 2.40E-03 |
| <i>UBL7-AS1</i>        | UBL7 antisense RNA 1 (head to head)                              | ENSG00000247240 | -1.759 | 4.20E-02 |
| <i>UHRF1</i>           | ubiquitin like with PHD and ring finger domains 1                | ENSG00000276043 | -1.527 | 2.00E-04 |
| <i>UNC5D</i>           | unc-5 netrin receptor D                                          | ENSG00000156687 | 2.001  | 9.40E-03 |
| <i>UPP1</i>            | uridine phosphorylase 1                                          | ENSG00000183696 | 1.138  | 4.40E-03 |
| <i>USP1</i>            | ubiquitin specific peptidase 1                                   | ENSG00000162607 | -0.913 | 2.50E-02 |
| <i>UST-AS1</i>         | UST antisense RNA 1                                              | ENSG00000227660 | 1.034  | 4.80E-02 |
| <i>VASH2</i>           | vasohibin 2                                                      | ENSG00000143494 | 0.832  | 4.50E-02 |
| <i>VDR</i>             | vitamin D receptor                                               | ENSG00000111424 | 1.568  | 2.60E-03 |
| <i>VSTM2L</i>          | V-set and transmembrane domain containing 2 like                 | ENSG00000132821 | -1.614 | 4.10E-02 |
| <i>VTN</i>             | vitronectin                                                      | ENSG00000109072 | 1.572  | 1.60E-03 |
| <i>VWA5B2</i>          | von Willebrand factor A domain containing 5B2                    | ENSG00000145198 | 4.839  | 1.50E-14 |
| <i>WDHD1</i>           | WD repeat and HMG-box DNA binding protein 1                      | ENSG00000198554 | -1.224 | 5.20E-03 |
| <i>WDR62</i>           | WD repeat domain 62                                              | ENSG00000075702 | -1.801 | 1.60E-04 |
| <i>WIPI1</i>           | WD repeat domain, phosphoinositide interacting 1                 | ENSG00000070540 | 0.841  | 4.00E-02 |
| <i>WLS</i>             | Wnt ligand secretion mediator                                    | ENSG00000116729 | -0.930 | 1.90E-02 |
| <i>WNT2B</i>           | Wnt family member 2B                                             | ENSG00000134245 | 1.292  | 5.00E-03 |
| <i>WNT5A</i>           | Wnt family member 5A                                             | ENSG00000114251 | 1.069  | 8.80E-03 |
| <i>WNT5A-AS1</i>       | WNT5A antisense RNA 1                                            | ENSG00000244586 | 1.761  | 7.00E-04 |
| <i>WNT7B</i>           | Wnt family member 7B                                             | ENSG00000188064 | -2.905 | 1.40E-03 |
| <i>XXBAC_BPG252P99</i> |                                                                  | ENSG00000272540 | -0.864 | 2.80E-02 |

|                    |                                      |                 |        |          |
|--------------------|--------------------------------------|-----------------|--------|----------|
| <i>YPEL4</i>       | yippee like 4                        | ENSG00000166793 | 1.227  | 1.70E-02 |
| <i>ZGRF1</i>       | zinc finger GRF-type containing 1    | ENSG00000138658 | -1.298 | 9.50E-03 |
| <i>ZKSCAN7-AS1</i> | ZKSCAN7 ZNF cluster antisense RNA 1  | ENSG00000236869 | -2.015 | 2.10E-02 |
| <i>ZNF275</i>      | zinc finger protein 275              | ENSG00000063587 | 0.986  | 1.40E-02 |
| <i>ZNF33B</i>      | zinc finger protein 33B              | ENSG00000196693 | 1.107  | 2.50E-02 |
| <i>ZNF367</i>      | zinc finger protein 367              | ENSG00000165244 | -1.239 | 8.10E-03 |
| <i>ZNF436-AS1</i>  | ZNF436 antisense RNA 1               | ENSG00000249087 | 1.081  | 2.70E-02 |
| <i>ZNF641</i>      | zinc finger protein 641              | ENSG00000167528 | 0.842  | 4.40E-02 |
| <i>ZNF703</i>      | zinc finger protein 703              | ENSG00000183779 | -0.860 | 3.10E-02 |
| <i>ZNF714</i>      | zinc finger protein 714              | ENSG00000160352 | -1.537 | 4.10E-03 |
| <i>ZWILCH</i>      | zwilch kinetochore protein           | ENSG00000174442 | -1.024 | 1.60E-02 |
| <i>ZWINT</i>       | ZW10 interacting kinetochore protein | ENSG00000122952 | -1.281 | 1.70E-03 |

**Table S3.** List of upstream regulators in treatments (melatonin, FSK) (*p*-value of overlap  $\geq 0.05$ ).

| Melatonin Treatment               |                |                                 |                            |                    |                    |
|-----------------------------------|----------------|---------------------------------|----------------------------|--------------------|--------------------|
| Upstream Regulator                | Expr Log Ratio | Molecule Type                   | Predicted Activation State | Activation z-score | p-value of overlap |
| DAP3                              | 0.150          | other                           | Inhibited                  | -2.449             | 2.64E-06           |
| MT-TE                             | -0.418         | other                           |                            |                    | 4.96E-05           |
| LONP1                             | -0.026         | peptidase                       |                            | -0.522             | 7.91E-05           |
| STOX1                             |                | other                           |                            |                    | 8.31E-05           |
| actinonin                         |                | chemical reagent                | Activated                  | 2.236              | 2.35E-04           |
| HIF1A                             | 0.061          | transcription regulator         |                            | 0.520              | 6.20E-04           |
| MALSU1                            | -0.089         | other                           |                            |                    | 8.09E-04           |
| Ap2 alpha                         |                | group                           |                            |                    | 8.09E-04           |
| MRPL14                            | -0.200         | other                           |                            |                    | 1.38E-03           |
| trans-hydroxytamoxifen            |                | chemical drug                   |                            | -0.775             | 1.97E-03           |
| SIRT3                             | -0.080         | enzyme                          | Activated                  | 2.020              | 1.99E-03           |
| Retinoic acid-RAR-RXR             |                | complex                         |                            |                    | 2.15E-03           |
| ALKBH1                            | -0.248         | enzyme                          |                            |                    | 2.15E-03           |
| NSUN3                             | 0.269          | enzyme                          |                            |                    | 2.15E-03           |
| GPB1                              | -1.153         | G-protein coupled receptor      |                            | 1.242              | 2.23E-03           |
| PHB2                              | 0.083          | transcription regulator         |                            | 1.000              | 2.54E-03           |
| HNF4A                             |                | transcription regulator         |                            | -0.170             | 3.07E-03           |
| ARHGDIG                           |                | other                           |                            | -1.000             | 3.18E-03           |
| IFITM1                            | -0.645         | transmembrane receptor          | Activated                  | 2.000              | 3.18E-03           |
| miR-892b (miRNAs w/seed ACUGGCU)  |                | mature microRNA                 |                            |                    | 3.65E-03           |
| taprostene                        |                | chemical reagent                |                            |                    | 3.65E-03           |
| ACSL4                             | 0.007          | enzyme                          |                            | -0.391             | 3.71E-03           |
| PPARGC1B                          |                | transcription regulator         |                            | -1.134             | 3.80E-03           |
| hydrocortisone                    |                | chemical - endogenous mammalian |                            | -1.086             | 4.32E-03           |
| LCOR                              | -0.109         | transcription regulator         |                            |                    | 4.37E-03           |
| EIF4E                             | -0.003         | translation regulator           |                            | -1.414             | 5.28E-03           |
| FLCN                              | -0.361         | other                           | Activated                  | 2.214              | 6.44E-03           |
| miR-331-3p (miRNAs w/seed CCCUGG) |                | mature microRNA                 |                            |                    | 7.12E-03           |
| PAPOLA                            | 0.048          | enzyme                          |                            |                    | 7.12E-03           |
| PAF1                              | -0.087         | other                           |                            | 0.447              | 7.30E-03           |
| torin1                            |                | chemical reagent                |                            | 1.718              | 7.81E-03           |
| MIR4269                           |                | microRNA                        |                            |                    | 1.16E-02           |
| Cox5b                             |                | other                           |                            |                    | 1.16E-02           |
| pemetrexed                        |                | chemical drug                   |                            |                    | 1.16E-02           |
| Betacatenin/TCF                   |                | complex                         |                            |                    | 1.19E-02           |
| TFAP2B                            |                | transcription regulator         |                            |                    | 1.19E-02           |

|                                                |        |                                      |                  |          |
|------------------------------------------------|--------|--------------------------------------|------------------|----------|
| AKT3                                           | 0.146  | kinase                               |                  | 1.24E-02 |
| MYOC                                           |        | other                                |                  | 1.25E-02 |
| phenethyl isothiocyanate                       |        | chemical drug                        | -1.000           | 1.35E-02 |
| MT-TM                                          |        | other                                |                  | 1.45E-02 |
| CNOT3                                          | 0.060  | other                                |                  | 1.45E-02 |
| RICTOR                                         | 0.110  | other                                | 1.780            | 1.53E-02 |
| NR4A1                                          | 0.077  | ligand-dependent<br>nuclear receptor | 0.905            | 1.53E-02 |
| RRP1B                                          | 0.149  | transcription regu-<br>lator         |                  | 1.59E-02 |
| AP2M1                                          | -0.138 | transporter                          |                  | 1.70E-02 |
| TAB2                                           | 0.097  | other                                |                  | 1.70E-02 |
| FGF18                                          |        | growth factor                        |                  | 1.70E-02 |
| Congo Red                                      |        | chemical toxicant                    |                  | 1.70E-02 |
| calcium chloride                               |        | chemical drug                        |                  | 1.70E-02 |
| Rhox5                                          |        | transcription regu-<br>lator         |                  | 1.74E-02 |
| 1810019D21Rik                                  |        | other                                | -0.816           | 1.75E-02 |
| ASXL2                                          | -0.159 | other                                | -1.000           | 1.82E-02 |
| bexarotene                                     |        | chemical drug                        | -0.826           | 1.98E-02 |
| miR-21-5p (and other miRNAs w/seed<br>AGCUUAU) |        | mature microRNA                      | Inhibited -2.410 | 2.04E-02 |
| coenzyme Q10                                   |        | chemical drug                        |                  | 2.06E-02 |
| cerulenin                                      |        | chemical drug                        |                  | 2.06E-02 |
| TFE3                                           | 0.010  | transcription regu-<br>lator         | Inhibited -2.236 | 2.25E-02 |
| CNOT7                                          | 0.018  | transcription regu-<br>lator         |                  | 2.28E-02 |
| ZNF746                                         | 0.098  | transcription regu-<br>lator         |                  | 2.32E-02 |
| KMT5B                                          | -0.041 | enzyme                               |                  | 2.32E-02 |
| LRPPRC                                         | 0.136  | other                                |                  | 2.32E-02 |
| WNT10B                                         | 0.056  | other                                |                  | 2.32E-02 |
| ASARM-PO4                                      |        | chemical reagent                     |                  | 2.32E-02 |
| MYCN                                           |        | transcription regu-<br>lator         | Inhibited -3.208 | 2.38E-02 |
| MAP4K4                                         | -0.071 | kinase                               | -0.426           | 2.40E-02 |
| HNF1B                                          |        | transcription regu-<br>lator         | 0.889            | 2.40E-02 |
| NFIA                                           | 0.819  | transcription regu-<br>lator         |                  | 2.41E-02 |
| PDGF BB                                        |        | complex                              | 0.045            | 2.59E-02 |
| mir-181                                        |        | microRNA                             | 1.000            | 2.65E-02 |
| 4-hydroxytamoxifen                             |        | chemical drug                        | 0.095            | 2.74E-02 |
| EPAS1                                          | 0.186  | transcription regu-<br>lator         | 0.059            | 2.74E-02 |
| BACH1                                          | 0.126  | transcription regu-<br>lator         |                  | 2.79E-02 |
| F2R                                            | 0.006  | G-protein coupled<br>receptor        | -0.518           | 2.94E-02 |
| 6-amino-4-(4-                                  |        | chemical reagent                     |                  | 3.03E-02 |

|                                                      |        |                                   |        |          |
|------------------------------------------------------|--------|-----------------------------------|--------|----------|
| <b>phenoxyphenylethylamino)quinazoline</b>           |        |                                   |        |          |
| <b>L-type Calcium Channel</b>                        |        | complex                           |        | 3.03E-02 |
| <b>MRPL12</b>                                        | -0.142 | other                             |        | 3.03E-02 |
| <b>miR-217-5p (and other miRNAs w/seed ACUGCAU)</b>  |        | mature microRNA                   |        | 3.03E-02 |
| <b>RGS16</b>                                         |        | other                             |        | 3.03E-02 |
| <b>miR-16-5p (and other miRNAs w/seed AG-CAGCA)</b>  |        | mature microRNA                   | -0.430 | 3.05E-02 |
| <b>AHR</b>                                           | 0.231  | ligand-dependent nuclear receptor | -0.900 | 3.15E-02 |
| <b>LIPE</b>                                          | -0.493 | enzyme                            |        | 3.18E-02 |
| <b>ZNF202</b>                                        | 0.542  | transcription regulator           |        | 3.19E-02 |
| <b>ADRB1</b>                                         |        | G-protein coupled receptor        |        | 3.19E-02 |
| <b>LMNA</b>                                          | -0.013 | other                             |        | 3.36E-02 |
| <b>atractyloside</b>                                 |        | chemical toxicant                 |        | 3.53E-02 |
| <b>endocannabinoid</b>                               |        | chemical - endogenous mammalian   |        | 3.53E-02 |
| <b>tubulin (complex)</b>                             |        | complex                           |        | 3.53E-02 |
| <b>ASB9</b>                                          | -0.630 | transcription regulator           |        | 3.53E-02 |
| <b>WTIP</b>                                          | 0.074  | transcription regulator           |        | 3.53E-02 |
| <b>DNAJA4</b>                                        | -1.703 | other                             |        | 3.53E-02 |
| <b>TFAP2E</b>                                        | 0.341  | transcription regulator           |        | 3.53E-02 |
| <b>ANKRD12</b>                                       | 0.089  | other                             |        | 3.53E-02 |
| <b>BRINP1</b>                                        | 0.743  | peptidase                         |        | 3.53E-02 |
| <b>PPIP5K1</b>                                       | 0.157  | phosphatase                       |        | 3.53E-02 |
| <b>VPS36</b>                                         | 0.094  | other                             |        | 3.53E-02 |
| <b>FND3B</b>                                         | 0.100  | other                             |        | 3.53E-02 |
| <b>TMEM184A</b>                                      | -0.094 | other                             |        | 3.53E-02 |
| <b>DMTN</b>                                          | 0.072  | other                             |        | 3.53E-02 |
| <b>SGMS2</b>                                         | 0.172  | enzyme                            |        | 3.53E-02 |
| <b>CDCA4</b>                                         | 0.106  | other                             |        | 3.53E-02 |
| <b>RIC8A</b>                                         | 0.009  | other                             |        | 3.53E-02 |
| <b>PU-H71</b>                                        |        | chemical drug                     |        | 3.53E-02 |
| <b>SYTL4</b>                                         | 0.125  | transporter                       |        | 3.53E-02 |
| <b>AP2S1</b>                                         | 0.048  | transporter                       |        | 3.53E-02 |
| <b>MORF4L2</b>                                       | 0.027  | other                             |        | 3.53E-02 |
| <b>JAKMIP1</b>                                       |        | translation regulator             |        | 3.53E-02 |
| <b>SNAP91</b>                                        |        | other                             |        | 3.53E-02 |
| <b>CFI</b>                                           | 0.007  | peptidase                         |        | 3.53E-02 |
| <b>mir-3960</b>                                      |        | microRNA                          |        | 3.53E-02 |
| <b>miR-377-3p (miRNAs w/seed UCACACA)</b>            |        | mature microRNA                   |        | 3.53E-02 |
| <b>miR-548d-3p (and other miRNAs w/seed AAAAACC)</b> |        | mature microRNA                   |        | 3.53E-02 |
| <b>miR-331-5p (and other miRNAs w/seed UAGGUAU)</b>  |        | mature microRNA                   |        | 3.53E-02 |



|                                                        |        |                                              |        |          |
|--------------------------------------------------------|--------|----------------------------------------------|--------|----------|
| <b>miR-616-3p (miRNAs w/seed GUCAUUG)</b>              |        | mature microRNA                              |        | 3.53E-02 |
| <b>AX 115</b>                                          |        | chemical reagent                             |        | 3.53E-02 |
| <b>SCO2</b>                                            | -0.219 | enzyme                                       |        | 3.53E-02 |
| <b>KCNA1</b>                                           |        | ion channel                                  |        | 3.53E-02 |
| <b>SEM1</b>                                            | -0.108 | peptidase                                    |        | 3.53E-02 |
| <b>MAP7</b>                                            | -0.599 | other                                        |        | 3.53E-02 |
| <b>ECSCR</b>                                           |        | other                                        |        | 3.53E-02 |
| <b>ATP1B3</b>                                          | -0.066 | transporter                                  |        | 3.53E-02 |
| <b>CRABP1</b>                                          |        | transporter                                  |        | 3.53E-02 |
| <b>CFD</b>                                             |        | peptidase                                    |        | 3.53E-02 |
| <b>CAND1</b>                                           | 0.116  | transcription regu-<br>lator                 |        | 3.53E-02 |
| <b>chemotherapy/tretinoin</b>                          |        | chemical drug                                |        | 3.53E-02 |
| <b>MORF4L1</b>                                         | 0.025  | other                                        |        | 3.53E-02 |
| <b>ALYREF</b>                                          | -0.095 | transcription regu-<br>lator                 |        | 3.53E-02 |
| <b>DECR1</b>                                           | -0.037 | enzyme                                       |        | 3.53E-02 |
| <b>CHP1</b>                                            | -0.141 | transporter                                  |        | 3.53E-02 |
| <b>OPRL1</b>                                           | 0.056  | G-protein coupled<br>receptor                |        | 3.53E-02 |
| <b>IGHMBP2</b>                                         | -0.003 | enzyme                                       |        | 3.53E-02 |
| <b>SR11256</b>                                         |        | chemical reagent                             |        | 3.53E-02 |
| <b>RECTAS</b>                                          |        | chemical reagent                             |        | 3.53E-02 |
| <b>broussoflavonol b</b>                               |        | chemical reagent                             |        | 3.53E-02 |
| <b>Annonacin</b>                                       |        | chemical reagent                             |        | 3.53E-02 |
| <b>Clorgyline</b>                                      |        | chemical drug                                |        | 3.53E-02 |
| <b>4-diphenylacetoxy-1,1-<br/>dimethylpiperidinium</b> |        | chemical reagent                             |        | 3.53E-02 |
| <b>Thioperamide</b>                                    |        | chemical reagent                             |        | 3.53E-02 |
| <b>2,5-dihydroxymethylcinnamate</b>                    |        | chemical - kinase<br>inhibitor               |        | 3.53E-02 |
| <b>Nafoxidine</b>                                      |        | chemical drug                                |        | 3.53E-02 |
| <b>Astra 1397</b>                                      |        | chemical reagent                             |        | 3.53E-02 |
| <b>TAK-779</b>                                         |        | chemical drug                                |        | 3.53E-02 |
| <b>PD173955</b>                                        |        | chemical - kinase<br>inhibitor               |        | 3.53E-02 |
| <b>Fotemustine</b>                                     |        | chemical drug                                |        | 3.53E-02 |
| <b>quinuclidinyl benzilate</b>                         |        | chemical reagent                             |        | 3.53E-02 |
| <b>AP-1 decoy</b>                                      |        | chemical reagent                             |        | 3.53E-02 |
| <b>tartaric acid</b>                                   |        | chemical reagent                             |        | 3.53E-02 |
| <b>pristanic acid</b>                                  |        | chemical - endog-<br>enous mammalian         |        | 3.53E-02 |
| <b>2-ethylhexanoic acid</b>                            |        | chemical toxicant                            |        | 3.53E-02 |
| <b>Cycloleucine</b>                                    |        | chemical toxicant                            |        | 3.53E-02 |
| <b>hydrocortisone phosphate</b>                        |        | chemical drug                                |        | 3.53E-02 |
| <b>Tin</b>                                             |        | chemical reagent                             |        | 3.53E-02 |
| <b>FN1</b>                                             | 0.037  | enzyme                                       | -0.529 | 3.61E-02 |
| <b>MAT1A</b>                                           |        | enzyme                                       |        | 3.63E-02 |
| <b>(-)-epicatechin gallate</b>                         |        | chemical - endog-<br>enous non-<br>mammalian |        | 3.80E-02 |

|                                                  |        |                                              |        |          |
|--------------------------------------------------|--------|----------------------------------------------|--------|----------|
| TRG                                              |        | other                                        |        | 3.80E-02 |
| PHEX                                             | 0.544  | peptidase                                    |        | 3.80E-02 |
| Chromium                                         |        | chemical drug                                | -0.555 | 3.86E-02 |
| NORAD                                            | 0.111  | other                                        | -1.000 | 4.05E-02 |
| PTH                                              |        | other                                        | 0.152  | 4.06E-02 |
| Raloxifene                                       |        | chemical drug                                | -0.164 | 4.06E-02 |
| L-tryptophan                                     |        | chemical - endog-<br>enous mammalian         |        | 4.10E-02 |
| WDR5                                             | -0.068 | transcription regu-<br>lator                 |        | 4.10E-02 |
| PBX3                                             | 0.124  | transcription regu-<br>lator                 |        | 4.10E-02 |
| Apicidin                                         |        | chemical - endog-<br>enous non-<br>mammalian |        | 4.10E-02 |
| RASSF1                                           | -0.234 | other                                        | -1.066 | 4.20E-02 |
| MAP2K1                                           | 0.141  | kinase                                       | -0.181 | 4.30E-02 |
| SOX1                                             |        | transcription regu-<br>lator                 | 0.000  | 4.40E-02 |
| CAB39L                                           | 0.536  | kinase                                       | -1.000 | 4.41E-02 |
| CIDEc                                            |        | other                                        | 0.686  | 4.41E-02 |
| Erlotinib                                        |        | chemical drug                                | 0.956  | 4.41E-02 |
| oblimersen                                       |        | biologic drug                                | 0.447  | 4.42E-02 |
| PLAG1                                            | -0.122 | transcription regu-<br>lator                 | -1.432 | 4.42E-02 |
| alvespimycin                                     |        | chemical drug                                |        | 4.59E-02 |
| MBD1                                             | -0.107 | transcription regu-<br>lator                 |        | 4.59E-02 |
| cycloheximide                                    |        | chemical reagent                             | -0.701 | 4.60E-02 |
| NKX2-3                                           |        | transcription regu-<br>lator                 | -0.873 | 4.63E-02 |
| PHF21A                                           | -0.051 | other                                        |        | 4.64E-02 |
| MIR320                                           |        | group                                        |        | 4.64E-02 |
| NMNAT1                                           | 0.145  | enzyme                                       |        | 4.64E-02 |
| lapatinib                                        |        | chemical drug                                |        | 4.64E-02 |
| levamisole                                       |        | chemical drug                                |        | 4.64E-02 |
| ibandronic acid                                  |        | chemical drug                                |        | 4.64E-02 |
| cortistatin A                                    |        | chemical reagent                             |        | 4.64E-02 |
| tiron                                            |        | chemical reagent                             |        | 4.64E-02 |
| miR-125b-5p (and other miRNAs w/seed<br>CCCUGAG) |        | mature microRNAInhibited                     | -2.590 | 4.86E-02 |
| TREM1                                            |        | transmembrane<br>receptor                    | -0.577 | 4.89E-02 |
| sirolimus                                        |        | chemical drug Activated                      | 3.313  | 6.92E-02 |
| RUNX3                                            |        | transcription regu-<br>lator Inhibited       | -2.646 | 7.82E-02 |
| NEUROG1                                          |        | transcription regu-<br>lator Activated       | 2.236  | 7.93E-02 |
| KLF3                                             | -0.123 | transcription regu-<br>lator Inhibited       | -2.183 | 8.32E-02 |
| TOB1                                             | -0.204 | transcription regu-Activated                 | 2.000  | 8.87E-02 |

|                           |        |                                   |           |        |          |
|---------------------------|--------|-----------------------------------|-----------|--------|----------|
|                           |        | lactor                            |           |        |          |
| TRAP1                     | 0.078  | enzyme                            | Activated | 2.449  | 9.48E-02 |
| ATF4                      | -0.144 | transcription regulator           | Activated | 2.154  | 1.17E-01 |
| PGR                       | 0.235  | ligand-dependent nuclear receptor | Inhibited | -2.104 | 1.20E-01 |
| carboplatin               |        | chemical drug                     |           | -1.953 | 1.29E-01 |
| trichostatin A            |        | chemical drug                     | Inhibited | -2.044 | 1.31E-01 |
| MSC                       | -0.038 | transcription regulator           | Activated | 2.000  | 1.42E-01 |
| NRIP1                     | 0.185  | transcription regulator           |           | 1.961  | 1.68E-01 |
| EGLN1                     | 0.085  | enzyme                            |           | -1.982 | 1.75E-01 |
| metribolone               |        | chemical reagent                  | Inhibited | -2.706 | 1.90E-01 |
| CLPP                      | -0.025 | peptidase                         | Activated | 2.000  | 1.97E-01 |
| decitabine                |        | chemical drug                     |           | -1.911 | 2.03E-01 |
| trovafloxacin             |        | chemical drug                     | Inhibited | -2.000 | 2.19E-01 |
| PTEN                      | 0.141  | phosphatase                       | Inhibited | -2.210 | 2.30E-01 |
| heparin                   |        | chemical - endogenous mammalian   |           | 1.969  | 2.57E-01 |
| tazemetostat              |        | chemical drug                     |           | -1.994 | 2.60E-01 |
| MTOR                      | 0.059  | kinase                            |           | -1.795 | 2.61E-01 |
| SP2509                    |        | chemical reagent                  |           | -1.994 | 3.06E-01 |
| STK11                     | 0.053  | kinase                            | Inhibited | -2.331 | 3.24E-01 |
| LCN2                      |        | transporter                       |           | 1.951  | 3.61E-01 |
| PPARD                     | 0.039  | ligand-dependent nuclear receptor | Activated | 2.803  | 3.79E-01 |
| KDM1A                     | 0.082  | enzyme                            |           | 1.964  | 4.00E-01 |
| mir-21                    |        | microRNA                          | Inhibited | -2.529 | 4.02E-01 |
| CXCL12                    |        | cytokine                          |           | -1.942 | 4.05E-01 |
| okadaic acid              |        | chemical toxicant                 |           | -1.982 | 4.25E-01 |
| SP600125                  |        | chemical - kinase inhibitor       | Inhibited | -2.230 | 4.79E-01 |
| KLF11                     | -0.231 | transcription regulator           |           | -1.913 | 4.80E-01 |
| CDKN2A                    |        | transcription regulator           |           | -1.929 | 4.83E-01 |
| HSF1                      | -0.013 | transcription regulator           |           | 1.777  | 5.01E-01 |
| carbon tetrachloride      |        | chemical toxicant                 | Inhibited | -2.234 | 5.01E-01 |
| PRKCD                     | -0.377 | kinase                            |           | 1.890  | 5.08E-01 |
| fatty acid                |        | chemical - endogenous mammalian   |           | 1.960  | 5.33E-01 |
| isobutylmethylxanthine    |        | chemical toxicant                 |           | 1.941  | 1.00E00  |
| 5-fluorouracil            |        | chemical drug                     |           | 1.912  | 1.00E00  |
| etoposide                 |        | chemical drug                     |           | -1.982 | 1.00E00  |
| 17-alpha-ethinylestradiol |        | chemical drug                     |           | -1.982 | 1.00E00  |
| Pkc(s)                    |        | group                             |           | 1.987  | 1.00E00  |
| 26s Proteasome            |        | complex                           |           | 1.982  | 1.00E00  |
| CCND1                     | -0.063 | transcription regulator           |           | 1.969  | 1.00E00  |

| APOE               | -0.592            | transporter                          |                                  | -1.944                 | 1.00E00               |
|--------------------|-------------------|--------------------------------------|----------------------------------|------------------------|-----------------------|
| GATA6              | 0.135             | transcription regu-<br>lator         | Activated                        | 2.000                  | 1.00E00               |
| YAP1               | -0.014            | transcription regu-<br>lator         |                                  | 1.949                  | 1.00E00               |
| NFATC2             | 0.207             | transcription regu-<br>lator         | Activated                        | 2.000                  | 1.00E00               |
| TCF7L2             | -0.111            | transcription regu-<br>lator         |                                  | 1.890                  | 1.00E00               |
| EPO                |                   | cytokine                             |                                  | 1.982                  | 1.00E00               |
| WNT3A              |                   | cytokine                             |                                  | 1.828                  | 1.00E00               |
| pioglitazone       |                   | chemical drug                        | Inhibited                        | -2.160                 | 1.00E00               |
| dimethyl sulfoxide |                   | chemical drug                        | Activated                        | 2.000                  | 1.00E00               |
| isoproterenol      |                   | chemical drug                        | Activated                        | 2.166                  | 1.00E00               |
| cyclosporin A      |                   | biologic drug                        |                                  | -1.849                 | 1.00E00               |
| D-glucose          |                   | chemical - endog-<br>enous mammalian |                                  | 1.847                  | 1.00E00               |
| wortmannin         |                   | chemical - kinase<br>inhibitor       |                                  | 1.969                  | 1.00E00               |
| testosterone       |                   | chemical - endog-<br>enous mammalian | Inhibited                        | -2.270                 | 1.00E00               |
| Ca2+               |                   | chemical – endog-<br>enous mammalian | Activated                        | 2.959                  | 1.00E00               |
| FSK treatment      |                   |                                      |                                  |                        |                       |
| Upstream Regulator | Expr Log<br>Ratio | Molecule Type                        | Predicted<br>Activation<br>State | Activation z-<br>score | p-value of<br>overlap |
| ZBTB17             | -0.243            | transcription regu-<br>lator         |                                  |                        | 1.55E-26              |
| Vegf               |                   | group                                | Inhibited                        | -2.090                 | 5.96E-18              |
| dexamethasone      |                   | chemical drug                        | Activated                        | 2.176                  | 4.18E-16              |
| PTGER2             | -0.527            | G-protein coupled<br>receptor        | Inhibited                        | -3.394                 | 1.09E-15              |
| TP53               | -0.267            | transcription regu-<br>lator         |                                  | 1.729                  | 5.11E-15              |
| HGF                |                   | growth factor                        | Inhibited                        | -2.072                 | 7.72E-15              |
| CDKN1A             | 0.081             | kinase                               |                                  | 1.907                  | 8.50E-15              |
| forskolin          |                   | chemical toxicant                    | Activated                        | 3.974                  | 1.10E-14              |
| FOXO1              | -1.262            | transcription regu-<br>lator         | Inhibited                        | -3.168                 | 8.99E-14              |
| NR1H3              | 0.652             | ligand-dependent<br>nuclear receptor |                                  |                        | 1.10E-13              |
| AREG               | 0.650             | growth factor                        | Inhibited                        | -3.357                 | 3.02E-13              |
| E2F4               | -0.407            | transcription regu-<br>lator         |                                  |                        | 1.10E-12              |
| RABL6              | -0.248            | other                                | Inhibited                        | -3.606                 | 1.38E-12              |
| CCND1              | -0.747            | transcription regu-<br>lator         | Inhibited                        | -2.121                 | 7.35E-12              |
| TCF3               | -0.367            | transcription regu-<br>lator         |                                  | 1.667                  | 8.34E-12              |
| CREB1              | 0.091             | transcription regu-                  |                                  | 0.312                  | 9.32E-12              |

|                                                                                    |        |                                      |           |        |          |
|------------------------------------------------------------------------------------|--------|--------------------------------------|-----------|--------|----------|
|                                                                                    |        | lactor                               |           |        |          |
| <b>Pka</b>                                                                         |        | complex                              | Activated | 2.408  | 3.77E-11 |
| <b>CDK4</b>                                                                        | -0.560 | kinase                               |           |        | 4.20E-11 |
| <b>dextran sulfate</b>                                                             |        | chemical drug                        |           |        | 1.06E-10 |
| <b>LDLR</b>                                                                        | 0.325  | transporter                          |           |        | 3.32E-10 |
| <b>TGFB1</b>                                                                       | -0.079 | growth factor                        |           | -0.136 | 9.14E-10 |
| <b>TCF4</b>                                                                        | 0.186  | transcription regu-<br>lator         |           |        | 1.21E-09 |
| <b>FOXO3</b>                                                                       | 0.142  | transcription regu-<br>lator         |           | 0.730  | 1.29E-09 |
| <b>HNF1A-AS1</b>                                                                   |        | other                                | Inhibited | -2.646 | 2.06E-09 |
| <b>ERBB2</b>                                                                       | 0.230  | kinase                               | Inhibited | -2.904 | 2.84E-09 |
| <b>FGF2</b>                                                                        | 0.116  | growth factor                        |           | -1.436 | 3.84E-09 |
| <b>calcitriol</b>                                                                  |        | chemical drug                        | Activated | 3.442  | 4.13E-09 |
| <b>LIN9</b>                                                                        | -1.300 | other                                | Inhibited | -2.619 | 4.65E-09 |
| <b>CDKN2A</b>                                                                      |        | transcription regu-<br>lator         | Activated | 3.605  | 8.67E-09 |
| <b>EGF</b>                                                                         | 1.097  | growth factor                        |           | -0.337 | 1.06E-08 |
| <b>CSF2</b>                                                                        |        | cytokine                             | Inhibited | -3.266 | 1.54E-08 |
| <b>ESR1</b>                                                                        | 1.726  | ligand-dependent<br>nuclear receptor | Inhibited | -2.021 | 3.53E-08 |
| <b>IL1B</b>                                                                        | 0.343  | cytokine                             |           | 0.934  | 3.85E-08 |
| <b>actinomycin D</b>                                                               |        | biologic drug                        |           | -1.296 | 7.21E-08 |
| <b>PHF21A</b>                                                                      | 0.234  | other                                | Activated | 2.190  | 7.30E-08 |
| <b>YAP1</b>                                                                        | 0.072  | transcription regu-<br>lator         |           | -1.937 | 8.11E-08 |
| <b>diethylstilbestrol</b>                                                          |        | chemical drug                        |           | -1.528 | 8.96E-08 |
| <b>YY1</b>                                                                         | -0.116 | transcription regu-<br>lator         |           |        | 1.09E-07 |
| <b>NUPR1</b>                                                                       | -0.122 | transcription regu-<br>lator         | Activated | 2.711  | 1.25E-07 |
| <b>AIP</b>                                                                         | 0.199  | transcription regu-<br>lator         | Inhibited | -2.138 | 1.65E-07 |
| <b>2-(4-amino-1-isopropyl-1H-pyrazolo[3,4-<br/>d]pyrimidin-3-yl)-1H-indol-5-ol</b> |        | chemical reagent                     | Activated | 2.985  | 1.80E-07 |
| <b>fluocinolone acetonide</b>                                                      |        | chemical drug                        |           | -0.707 | 1.94E-07 |
| <b>AR</b>                                                                          | -0.158 | ligand-dependent<br>nuclear receptor |           | -1.808 | 3.58E-07 |
| <b>MITF</b>                                                                        | 0.133  | transcription regu-<br>lator         | Inhibited | -3.189 | 3.63E-07 |
| <b>TNF</b>                                                                         |        | cytokine                             |           | 0.329  | 5.74E-07 |
| <b>CREM</b>                                                                        | 0.226  | transcription regu-<br>lator         |           | -0.622 | 6.12E-07 |
| <b>8-bromo-cAMP</b>                                                                |        | chemical reagent                     | Activated | 2.429  | 6.40E-07 |
| <b>beta-estradiol</b>                                                              |        | chemical - endog-<br>enous mammalian |           | 1.142  | 6.65E-07 |
| <b>IL6</b>                                                                         | 0.549  | cytokine                             |           | 0.254  | 7.16E-07 |
| <b>tetradecanoylphorbol acetate</b>                                                |        | chemical drug                        |           | 0.649  | 8.36E-07 |
| <b>EP400</b>                                                                       | -0.207 | other                                | Inhibited | -2.621 | 8.60E-07 |
| <b>filgrastim</b>                                                                  |        | biologic drug                        |           | 1.023  | 9.40E-07 |
| <b>LY294002</b>                                                                    |        | chemical - kinase                    |           | -0.282 | 9.59E-07 |

|                         |        |                                 |           |        |          |
|-------------------------|--------|---------------------------------|-----------|--------|----------|
|                         |        | inhibitor                       |           |        |          |
| AGN194204               |        | chemical drug                   | Inhibited | -2.121 | 1.16E-06 |
| PTH                     |        | other                           |           | 0.554  | 1.86E-06 |
| tretinoin               |        | chemical - endogenous mammalian | Activated | 2.038  | 2.03E-06 |
| prostaglandin E2        |        | chemical - endogenous mammalian |           | 1.926  | 2.62E-06 |
| doxorubicin             |        | chemical drug                   | Activated | 2.282  | 2.68E-06 |
| triamcinolone acetonide |        | chemical drug                   |           | 0.507  | 2.82E-06 |
| RBPJ                    | -0.023 | transcription regulator         |           | 0.632  | 2.87E-06 |
| GW3965                  |        | chemical reagent                |           | 1.088  | 2.92E-06 |
| 4-hydroxytamoxifen      |        | chemical drug                   |           | 0.380  | 3.37E-06 |
| decitabine              |        | chemical drug                   |           | 1.453  | 3.72E-06 |
| Nr1h                    |        | group                           |           | 0.250  | 3.97E-06 |
| Pkc(s)                  |        | group                           | Activated | 2.376  | 4.47E-06 |
| TP73                    | -1.689 | transcription regulator         | Activated | 2.238  | 4.57E-06 |
| PDGF BB                 |        | complex                         |           | 1.320  | 4.94E-06 |
| P38 MAPK                |        | group                           |           | 1.232  | 5.89E-06 |
| WNT1                    |        | cytokine                        |           | -0.742 | 6.43E-06 |
| cyclic AMP              |        | chemical - endogenous mammalian | Activated | 2.801  | 7.07E-06 |
| LHCGR                   |        | G-protein coupled receptor      |           |        | 7.42E-06 |
| AGT                     |        | growth factor                   |           | 0.927  | 7.71E-06 |
| deferroxamine           |        | chemical drug                   |           | 0.389  | 8.46E-06 |
| discodermolide          |        | chemical drug                   |           |        | 8.68E-06 |
| KDM5B                   | 0.143  | transcription regulator         | Activated | 2.039  | 8.97E-06 |
| GATA4                   | 0.233  | transcription regulator         |           | 0.862  | 1.09E-05 |
| hydroxyurea             |        | chemical drug                   |           | -0.922 | 1.13E-05 |
| SNCA                    | 0.175  | enzyme                          |           | 1.116  | 1.17E-05 |
| etoposide               |        | chemical drug                   |           | 1.037  | 1.20E-05 |
| MAPK1                   | -0.118 | kinase                          |           | 0.000  | 1.23E-05 |
| FSH                     |        | complex                         |           | 1.733  | 1.61E-05 |
| CDC27                   | -0.057 | other                           |           |        | 1.94E-05 |
| trans-hydroxytamoxifen  |        | chemical drug                   |           | -0.905 | 1.96E-05 |
| ASAH1                   | 0.639  | enzyme                          |           | -1.231 | 1.96E-05 |
| PRKAA1                  | 0.150  | kinase                          |           | -1.126 | 2.00E-05 |
| AG490                   |        | chemical - kinase inhibitor     |           | 0.115  | 2.13E-05 |
| NKX2-3                  |        | transcription regulator         |           | -0.624 | 2.22E-05 |
| MYBL2                   | -1.186 | transcription regulator         | Inhibited | -2.179 | 2.32E-05 |
| cycloheximide           |        | chemical reagent                |           | -1.130 | 2.49E-05 |
| glucocorticoid          |        | chemical drug                   |           | 0.440  | 2.55E-05 |
| tributyltin             |        | chemical reagent                |           | -1.890 | 2.57E-05 |
| lipopolysaccharide      |        | chemical drug                   | Activated | 2.130  | 3.12E-05 |

|                             |        |                                      |           |        |          |
|-----------------------------|--------|--------------------------------------|-----------|--------|----------|
| MED1                        | 0.006  | transcription regu-<br>lator         |           | -1.238 | 3.49E-05 |
| medroxyprogesterone acetate |        | chemical drug                        | Activated | 2.985  | 3.60E-05 |
| F2                          | -0.708 | peptidase                            |           | 1.828  | 3.82E-05 |
| CCAR1                       | -0.178 | transcription regu-<br>lator         |           |        | 3.84E-05 |
| CTNNB1                      | -0.063 | transcription regu-<br>lator         |           | 0.789  | 4.07E-05 |
| bleomycin                   |        | chemical drug                        |           | -1.019 | 4.09E-05 |
| RBL2                        | 0.246  | other                                | Activated | 2.382  | 4.19E-05 |
| progesterone                |        | chemical - endog-<br>enous mammalian |           | 0.734  | 4.25E-05 |
| bucladesine                 |        | chemical toxicant                    | Activated | 2.306  | 4.69E-05 |
| GPER1                       | -1.087 | G-protein coupled<br>receptor        |           | 1.673  | 4.72E-05 |
| FSHR                        | 3.080  | G-protein coupled<br>receptor        |           | 1.387  | 4.72E-05 |
| TFAP2A                      | 0.081  | transcription regu-<br>lator         |           | 1.545  | 4.83E-05 |
| NR3C2                       | 0.420  | ligand-dependent<br>nuclear receptor |           | 0.277  | 4.87E-05 |
| poly rI:rC-RNA              |        | biologic drug                        |           | 1.084  | 5.04E-05 |
| imipramine blue             |        | chemical drug                        | Activated | 2.186  | 5.42E-05 |
| Creb                        |        | group                                |           | 1.219  | 5.76E-05 |
| L-methionine                |        | chemical - endog-<br>enous mammalian |           |        | 5.87E-05 |
| CG                          |        | complex                              | Activated | 2.069  | 6.03E-05 |
| EWSR1                       | -0.096 | other                                |           | 0.447  | 6.30E-05 |
| BMP2                        |        | growth factor                        |           | 1.078  | 6.41E-05 |
| KDM1A                       | -0.068 | enzyme                               | Inhibited | -2.417 | 6.47E-05 |
| BNIP3L                      | 0.478  | other                                | Activated | 2.449  | 6.52E-05 |
| SLC5A8                      |        | transporter                          |           |        | 6.66E-05 |
| APC (complex)               |        | complex                              |           |        | 6.66E-05 |
| RBX1                        | -0.413 | enzyme                               |           |        | 6.66E-05 |
| CD24                        | 0.432  | other                                |           | -1.987 | 6.77E-05 |
| TGFB2                       | 0.624  | growth factor                        |           | -0.445 | 7.23E-05 |
| plicamycin                  |        | chemical drug                        |           | -0.355 | 7.71E-05 |
| ADRB                        |        | group                                |           | -0.504 | 8.10E-05 |
| Tgf beta                    |        | group                                |           | 0.270  | 8.54E-05 |
| Lh                          |        | complex                              |           | 1.387  | 8.70E-05 |
| E2F3                        | -0.330 | transcription regu-<br>lator         | Inhibited | -2.138 | 9.05E-05 |
| mifepristone                |        | chemical drug                        |           | -0.199 | 9.15E-05 |
| D-glucose                   |        | chemical - endog-<br>enous mammalian |           | 1.321  | 9.26E-05 |
| GNA15                       |        | enzyme                               |           |        | 9.33E-05 |
| PGF                         |        | growth factor                        |           |        | 9.56E-05 |
| GDF9                        | -0.293 | growth factor                        |           | -0.638 | 9.56E-05 |
| troglitazone                |        | chemical drug                        |           | -0.154 | 1.01E-04 |
| NONO                        | 0.004  | transcription regu-<br>lator         | Inhibited | -2.000 | 1.02E-04 |

|                                                |        |                                     |        |          |
|------------------------------------------------|--------|-------------------------------------|--------|----------|
| PD98059                                        |        | chemical - kinase inhibitor         | 0.637  | 1.06E-04 |
| FEV                                            |        | transcription regulator Activated   | 2.646  | 1.07E-04 |
| SMARCE1                                        | 0.047  | transcription regulator             |        | 1.24E-04 |
| VEGFA                                          | -0.345 | growth factor                       | 0.977  | 1.32E-04 |
| RB1                                            | -0.159 | transcription regulator             | -0.359 | 1.35E-04 |
| TAL1                                           |        | transcription regulator Inhibited   | -2.530 | 1.35E-04 |
| WNT3A                                          |        | cytokine                            | 0.437  | 1.35E-04 |
| Hif1                                           |        | complex                             | 0.068  | 1.40E-04 |
| L-triiodothyronine                             |        | chemical - endogenous mammalian     | 1.665  | 1.42E-04 |
| HDAC1                                          | -0.161 | transcription regulator             | -0.682 | 1.45E-04 |
| corticosterone                                 |        | chemical - endogenous mammalian     | 1.044  | 1.50E-04 |
| BMP15                                          |        | growth factor                       | -1.964 | 1.50E-04 |
| FSHB                                           |        | other                               | 0.152  | 1.50E-04 |
| NR3C1                                          | -0.080 | ligand-dependent nuclear receptor   | 0.406  | 1.52E-04 |
| gemcitabine                                    |        | chemical drug                       | -1.014 | 1.53E-04 |
| Sn50 peptide                                   |        | chemical toxicant                   | 0.555  | 1.53E-04 |
| bazedoxifene                                   |        | chemical drug                       |        | 1.57E-04 |
| prodigiosin                                    |        | chemical toxicant                   |        | 1.57E-04 |
| FHL1                                           | -0.049 | other                               |        | 1.58E-04 |
| SLC8A1                                         | -1.559 | transporter                         |        | 1.58E-04 |
| 1,1-bis(3'-indolyl)-1-(4-hydroxyphenyl)methane |        | chemical reagent                    |        | 1.58E-04 |
| 4-(octyloxy)phenol                             |        | chemical reagent                    |        | 1.58E-04 |
| 4-(heptyloxy)phenol                            |        | chemical reagent                    |        | 1.58E-04 |
| GNAQ                                           | 0.371  | enzyme                              |        | 1.68E-04 |
| JAG1                                           | -0.215 | growth factor                       | 0.200  | 1.77E-04 |
| CRH                                            |        | cytokine                            | 1.995  | 1.82E-04 |
| ESR2                                           | 1.943  | ligand-dependent nuclear receptor   | 0.638  | 1.90E-04 |
| EGR2                                           | -1.225 | transcription regulator             | 1.408  | 1.92E-04 |
| RARA                                           | -0.470 | ligand-dependent nuclear receptor   | -1.342 | 1.99E-04 |
| nitric oxide                                   |        | chemical - endogenous mammalian     | 1.236  | 2.01E-04 |
| TREM1                                          |        | transmembrane receptor              | -0.223 | 2.16E-04 |
| anacardic acid                                 |        | chemical - endogenous non-mammalian |        | 2.22E-04 |
| SMOC2                                          |        | other                               |        | 2.22E-04 |
| BMS-754807                                     |        | chemical drug                       |        | 2.22E-04 |



|                                            |        |                                     |           |        |          |
|--------------------------------------------|--------|-------------------------------------|-----------|--------|----------|
| <b>mir-21</b>                              |        | microRNA                            | Activated | 3.464  | 2.41E-04 |
| <b>bee venom</b>                           |        | chemical - endogenous non-mammalian | Activated | 2.640  | 2.42E-04 |
| <b>Irgm1</b>                               |        | other                               | Activated | 2.219  | 2.47E-04 |
| <b>Histone h3</b>                          |        | group                               |           |        | 2.67E-04 |
| <b>NS-398</b>                              |        | chemical reagent                    |           | -0.152 | 2.74E-04 |
| <b>Hdac</b>                                |        | group                               | Inhibited | -2.099 | 2.76E-04 |
| <b>let-7</b>                               |        | microRNA                            |           | 1.440  | 2.86E-04 |
| <b>dihydrotestosterone</b>                 |        | chemical - endogenous mammalian     |           | 0.160  | 2.91E-04 |
| <b>PTHLH</b>                               | -0.438 | other                               |           | 1.067  | 2.94E-04 |
| <b>Pka catalytic subunit</b>               |        | group                               |           | 1.941  | 2.95E-04 |
| <b>HAND1</b>                               |        | transcription regulator             |           | 1.000  | 2.95E-04 |
| <b>FGF9</b>                                |        | growth factor                       | Activated | 2.000  | 2.95E-04 |
| <b>PBRM1</b>                               | -0.117 | other                               |           |        | 3.02E-04 |
| <b>IGF2</b>                                |        | growth factor                       |           |        | 3.15E-04 |
| <b>Calcineurin protein(s)</b>              |        | complex                             |           | 0.328  | 3.17E-04 |
| <b>BMP4</b>                                | 0.059  | growth factor                       |           | 1.443  | 3.21E-04 |
| <b>estrogen</b>                            |        | chemical drug                       |           | -0.533 | 3.22E-04 |
| <b>panobinostat</b>                        |        | chemical drug                       |           | -1.067 | 3.36E-04 |
| <b>phenylephrine</b>                       |        | chemical drug                       |           | 1.478  | 3.41E-04 |
| <b>AMH</b>                                 | -0.059 | growth factor                       |           | -1.103 | 3.43E-04 |
| <b>NR5A2</b>                               | -0.160 | ligand-dependent nuclear receptor   |           | 1.652  | 3.49E-04 |
| <b>JUN</b>                                 | -0.939 | transcription regulator             |           | -0.504 | 3.62E-04 |
| <b>INHA</b>                                | 2.440  | growth factor                       |           | 0.570  | 3.70E-04 |
| <b>TBX2</b>                                | 1.543  | transcription regulator             |           | -1.633 | 3.94E-04 |
| <b>TLX1</b>                                |        | transcription regulator             |           | -1.000 | 3.97E-04 |
| <b>cucurbitacin B</b>                      |        | chemical - endogenous non-mammalian |           |        | 3.99E-04 |
| <b>gefitinib</b>                           |        | chemical drug                       |           | 1.981  | 4.06E-04 |
| <b>5-N-ethylcarboxamido adenosine</b>      |        | chemical reagent                    |           | 1.344  | 4.15E-04 |
| <b>SMARCA4</b>                             | -0.017 | transcription regulator             |           | 1.155  | 4.19E-04 |
| <b>nifedipine</b>                          |        | chemical drug                       |           | -0.447 | 4.23E-04 |
| <b>IGF1</b>                                |        | growth factor                       |           | 0.010  | 4.25E-04 |
| <b>SHH</b>                                 |        | peptidase                           |           | -0.652 | 4.60E-04 |
| <b>PEPCK</b>                               |        | group                               |           |        | 4.70E-04 |
| <b>AZD7762</b>                             |        | chemical drug                       |           |        | 4.70E-04 |
| <b>CDC20</b>                               | -1.696 | other                               |           |        | 4.70E-04 |
| <b>WTAP</b>                                | -0.268 | other                               |           |        | 4.70E-04 |
| <b>methoxyacetic acid</b>                  |        | chemical toxicant                   |           |        | 4.70E-04 |
| <b>bisindolylmaleimide I</b>               |        | chemical - kinase inhibitor         |           | -1.195 | 5.18E-04 |
| <b>S-nitroso-N-acetyl-DL-penicillamine</b> |        | chemical reagent                    |           | 0.927  | 5.21E-04 |

|                                               |        |                                     |        |          |
|-----------------------------------------------|--------|-------------------------------------|--------|----------|
| CASP3                                         | -0.106 | peptidase                           | 0.187  | 5.21E-04 |
| STAT3                                         | 0.414  | transcription regulator             | 1.008  | 5.28E-04 |
| Histone h4                                    |        | group                               |        | 5.89E-04 |
| MBD3                                          | -0.124 | other                               |        | 5.93E-04 |
| butyric acid                                  |        | chemical - endogenous mammalian     | 1.302  | 6.12E-04 |
| fulvestrant                                   |        | chemical drug Activated             | 2.005  | 6.24E-04 |
| KLF4                                          | 0.773  | transcription regulator             | 0.681  | 6.24E-04 |
| NAE1                                          | -0.401 | enzyme                              |        | 6.48E-04 |
| pyruvic acid                                  |        | chemical - endogenous mammalian     |        | 6.48E-04 |
| NGF                                           | -0.940 | growth factor                       | 0.703  | 6.59E-04 |
| NFYB                                          | 0.281  | transcription regulator             |        | 6.64E-04 |
| KDM4C                                         | -0.268 | enzyme                              |        | 6.70E-04 |
| glucagon                                      |        | biologic drug Activated             | 2.236  | 6.90E-04 |
| MAPK14                                        | 0.214  | kinase Activated                    | 2.779  | 7.06E-04 |
| nicotine                                      |        | chemical drug                       | -0.158 | 7.33E-04 |
| CLEC4G                                        |        | other                               | 0.447  | 7.48E-04 |
| GNRH1                                         | -0.454 | other                               | -0.266 | 7.48E-04 |
| SB203580                                      |        | chemical - kinase inhibitor         | -1.966 | 7.83E-04 |
| INHBA                                         | 1.257  | growth factor                       | 1.335  | 7.90E-04 |
| miR-143-3p (and other miRNAs w/seed GA-GAUGA) |        | mature microRNA                     |        | 8.03E-04 |
| PDE5A                                         | 0.118  | enzyme                              |        | 8.03E-04 |
| nocodazole                                    |        | chemical reagent                    | 0.072  | 8.12E-04 |
| WT1                                           |        | transcription regulator             | -1.128 | 8.31E-04 |
| ADCYAP1                                       |        | other                               | 1.258  | 8.58E-04 |
| salmonella minnesota R595 lipopolysaccharides |        | chemical - endogenous non-mammalian | 1.718  | 8.66E-04 |
| RUNX2                                         | 0.766  | transcription regulator             | -0.379 | 8.66E-04 |
| isoproterenol                                 |        | chemical drug                       | 1.371  | 9.03E-04 |
| ZFP36                                         | 0.537  | transcription regulator Activated   | 2.449  | 9.15E-04 |
| Cmtm2a                                        |        | transcription regulator             |        | 9.32E-04 |
| SP6                                           |        | transcription regulator             |        | 9.32E-04 |
| ARTN                                          | -1.597 | growth factor                       |        | 9.32E-04 |
| methyl cellosolve                             |        | chemical reagent                    |        | 9.32E-04 |
| SP1                                           | 0.058  | transcription regulator             | -0.031 | 9.44E-04 |
| epothilone B                                  |        | chemical drug                       |        | 9.79E-04 |
| HIF1AN                                        | 0.044  | enzyme                              |        | 9.79E-04 |
| MDK                                           | -0.460 | growth factor                       |        | 9.79E-04 |

|                                                                         |        |                                              |                  |          |
|-------------------------------------------------------------------------|--------|----------------------------------------------|------------------|----------|
| <b>cisplatin</b>                                                        |        | chemical drug                                | 0.345            | 9.99E-04 |
| <b>E2f</b>                                                              |        | group                                        | -1.980           | 1.00E-03 |
| <b>LIPE</b>                                                             | -0.642 | enzyme                                       |                  | 1.00E-03 |
| <b>TCF</b>                                                              |        | group                                        |                  | 1.03E-03 |
| <b>indomethacin</b>                                                     |        | chemical drug                                | 0.306            | 1.10E-03 |
| <b>WNT5A</b>                                                            | 1.069  | cytokine                                     | Inhibited -2.628 | 1.15E-03 |
| <b>Hmgb1</b>                                                            |        | transcription regu-<br>lator                 |                  | 1.18E-03 |
| <b>DDX25</b>                                                            |        | enzyme                                       |                  | 1.18E-03 |
| <b>LATS2</b>                                                            | 0.136  | kinase                                       |                  | 1.18E-03 |
| <b>P2RY2</b>                                                            |        | G-protein coupled<br>receptor                |                  | 1.18E-03 |
| <b>ATF6</b>                                                             | -0.013 | transcription regu-<br>lator                 | Inhibited -2.219 | 1.18E-03 |
| <b>uric acid</b>                                                        |        | chemical - endog-<br>enous mammalian         | Activated 2.000  | 1.22E-03 |
| <b>BMP7</b>                                                             |        | growth factor                                | -0.302           | 1.26E-03 |
| <b>TNFSF13B</b>                                                         | 0.665  | cytokine                                     |                  | 1.27E-03 |
| <b>PTGS2</b>                                                            | 1.253  | enzyme                                       | 0.198            | 1.29E-03 |
| <b>NFkB (complex)</b>                                                   |        | complex                                      | 0.196            | 1.31E-03 |
| <b>RELA</b>                                                             | 0.103  | transcription regu-<br>lator                 | 1.510            | 1.32E-03 |
| <b>docetaxel</b>                                                        |        | chemical drug                                | 0.131            | 1.32E-03 |
| <b>FOXO1</b>                                                            | 1.412  | transcription regu-<br>lator                 | -1.067           | 1.35E-03 |
| <b>Salmonella enterica serotype abortus equi<br/>lipopolysaccharide</b> |        | chemical toxicant                            | 1.414            | 1.39E-03 |
| <b>HCAR2</b>                                                            |        | G-protein coupled<br>receptor                |                  | 1.40E-03 |
| <b>KLK4</b>                                                             |        | peptidase                                    |                  | 1.40E-03 |
| <b>AKR1B1</b>                                                           | 0.043  | enzyme                                       |                  | 1.40E-03 |
| <b>indirubin</b>                                                        |        | chemical drug                                |                  | 1.40E-03 |
| <b>thiazolidinedione</b>                                                |        | chemical drug                                |                  | 1.40E-03 |
| <b>methylselenic acid</b>                                               |        | chemical reagent                             |                  | 1.41E-03 |
| <b>fluvastatin</b>                                                      |        | chemical drug                                |                  | 1.43E-03 |
| <b>norepinephrine</b>                                                   |        | chemical - endog-<br>enous mammalian         | 0.874            | 1.44E-03 |
| <b>NFKBIA</b>                                                           | -0.323 | transcription regu-<br>lator                 | 0.307            | 1.47E-03 |
| <b>raloxifene</b>                                                       |        | chemical drug                                | -1.134           | 1.50E-03 |
| <b>darusentan</b>                                                       |        | chemical drug                                |                  | 1.54E-03 |
| <b>acyline</b>                                                          |        | biologic drug                                |                  | 1.54E-03 |
| <b>HSD17B1</b>                                                          | 0.214  | enzyme                                       |                  | 1.54E-03 |
| <b>Mamld1</b>                                                           |        | other                                        |                  | 1.54E-03 |
| <b>scoparone</b>                                                        |        | chemical - endog-<br>enous non-<br>mammalian |                  | 1.54E-03 |
| <b>atrasentan</b>                                                       |        | chemical drug                                |                  | 1.54E-03 |
| <b>RXRA</b>                                                             | -0.248 | ligand-dependent<br>nuclear receptor         | -0.798           | 1.55E-03 |
| <b>NR5A1</b>                                                            | 0.264  | ligand-dependent                             | Activated 2.224  | 1.56E-03 |

|                               |        |                                      |                  |          |
|-------------------------------|--------|--------------------------------------|------------------|----------|
|                               |        | nuclear receptor                     |                  |          |
| <b>GHRL</b>                   |        | growth factor                        | -0.807           | 1.56E-03 |
| <b>CIITA</b>                  | 0.775  | transcription regu-<br>lator         | 1.993            | 1.57E-03 |
| <b>carbamylcholine</b>        |        | chemical drug                        | 0.277            | 1.57E-03 |
| <b>fluticasone propionate</b> |        | chemical drug                        | -0.863           | 1.61E-03 |
| <b>simvastatin</b>            |        | chemical drug                        | 0.530            | 1.62E-03 |
| <b>VHL</b>                    | -0.173 | transcription regu-<br>lator         |                  | 1.64E-03 |
| <b>HDAC4</b>                  | 0.282  | transcription regu-<br>lator         |                  | 1.64E-03 |
| <b>NUMB</b>                   | -0.385 | other                                |                  | 1.65E-03 |
| <b>ACTB</b>                   | -0.211 | other                                |                  | 1.65E-03 |
| <b>RARRES2</b>                | 0.345  | transmembrane<br>receptor            |                  | 1.65E-03 |
| <b>leuprolide</b>             |        | biologic drug                        |                  | 1.65E-03 |
| <b>PIK3CA</b>                 | 0.166  | kinase                               | -0.068           | 1.67E-03 |
| <b>LDL</b>                    |        | complex                              | 1.164            | 1.72E-03 |
| <b>PRKAA</b>                  |        | group                                | -0.124           | 1.73E-03 |
| <b>TLR7/8</b>                 |        | group                                | -1.067           | 1.73E-03 |
| <b>genistein</b>              |        | chemical drug                        | 1.262            | 1.82E-03 |
| <b>HTT</b>                    | 0.003  | transcription regu-<br>lator         | 0.277            | 1.83E-03 |
| <b>DMP1</b>                   |        | other                                | 1.000            | 1.89E-03 |
| <b>dacinostat</b>             |        | chemical drug                        |                  | 1.92E-03 |
| <b>PHB</b>                    | -0.359 | transcription regu-<br>lator         |                  | 1.92E-03 |
| <b>naloxone</b>               |        | chemical drug                        |                  | 1.92E-03 |
| <b>GLI3</b>                   | -0.295 | transcription regu-<br>lator         |                  | 2.02E-03 |
| <b>curcumin</b>               |        | chemical drug                        | 0.837            | 2.05E-03 |
| <b>BRCA1</b>                  | -1.447 | transcription regu-<br>lator         | -0.167           | 2.07E-03 |
| <b>hydrocortisone</b>         |        | chemical - endog-<br>enous mammalian | 0.520            | 2.10E-03 |
| <b>trichostatin A</b>         |        | chemical drug                        | 1.085            | 2.10E-03 |
| <b>E2F2</b>                   | -0.919 | transcription regu-<br>lator         | Inhibited -2.000 | 2.15E-03 |
| <b>GnRH-A</b>                 |        | chemical reagent                     | 1.172            | 2.15E-03 |
| <b>PPARA</b>                  | 0.657  | ligand-dependent<br>nuclear receptor | -1.172           | 2.21E-03 |
| <b>SRA1</b>                   | -0.094 | transcription regu-<br>lator         |                  | 2.22E-03 |
| <b>NR4A1</b>                  | 0.466  | ligand-dependent<br>nuclear receptor | -0.344           | 2.27E-03 |
| <b>RNF31</b>                  | 0.366  | enzyme                               | -0.600           | 2.28E-03 |
| <b>SPTBN2</b>                 | -0.452 | other                                |                  | 2.29E-03 |
| <b>LHX6</b>                   |        | transcription regu-<br>lator         |                  | 2.29E-03 |
| <b>G6PC</b>                   |        | phosphatase                          |                  | 2.29E-03 |
| <b>CIMO</b>                   |        | chemical reagent                     |                  | 2.29E-03 |

|                 |        |                                      |                  |          |
|-----------------|--------|--------------------------------------|------------------|----------|
| SQ 29548        |        | chemical reagent                     |                  | 2.29E-03 |
| fluphenazine    |        | chemical drug                        |                  | 2.29E-03 |
| GABA receptor   |        | complex                              |                  | 2.29E-03 |
| sparfosic acid  |        | chemical drug                        |                  | 2.29E-03 |
| NKX2-1          |        | transcription regu-<br>lator         |                  | 2.29E-03 |
| IGF1R           | 0.860  | transmembrane<br>receptor            | 1.826            | 2.40E-03 |
| MDM2            | -0.056 | transcription regu-<br>lator         | -0.832           | 2.42E-03 |
| thymoquinone    |        | chemical drug                        |                  | 2.44E-03 |
| CITED2          | 0.483  | transcription regu-<br>lator         |                  | 2.44E-03 |
| PRKACA          | -0.246 | kinase                               |                  | 2.44E-03 |
| Ro31-8220       |        | chemical - kinase<br>inhibitor       | -1.067           | 2.44E-03 |
| thyroid hormone |        | chemical - endog-<br>enous mammalian | -0.647           | 2.45E-03 |
| VIP             |        | other                                | 1.432            | 2.47E-03 |
| Pkg             |        | group                                |                  | 2.55E-03 |
| DYRK1A          | -0.087 | kinase                               |                  | 2.55E-03 |
| PTPN3           | -0.394 | phosphatase                          |                  | 2.55E-03 |
| U0126           |        | chemical - kinase<br>inhibitor       | -0.256           | 2.64E-03 |
| SB 216763       |        | chemical toxicant                    | 1.067            | 2.65E-03 |
| vincristine     |        | chemical drug                        |                  | 2.65E-03 |
| EGR1            | -0.161 | transcription regu-<br>lator         | Inhibited -2.376 | 2.71E-03 |
| RRP1B           | 0.008  | transcription regu-<br>lator         |                  | 2.71E-03 |
| POU4F1          |        | transcription regu-<br>lator         |                  | 2.71E-03 |
| ZNF217          | 0.203  | transcription regu-<br>lator         | -1.000           | 2.72E-03 |
| H89             |        | chemical - kinase<br>inhibitor       | -1.091           | 2.75E-03 |
| streptozocin    |        | chemical drug                        | 0.951            | 2.80E-03 |
| ADRA1B          | -0.046 | G-protein coupled<br>receptor        |                  | 2.87E-03 |
| ADRA1D          |        | G-protein coupled<br>receptor        |                  | 2.87E-03 |
| dinoprost       |        | chemical - endog-<br>enous mammalian | 0.399            | 2.88E-03 |
| Rb              |        | group                                |                  | 2.88E-03 |
| RBL1            | -1.350 | transcription regu-<br>lator         |                  | 2.88E-03 |
| AICAR           |        | chemical - endog-<br>enous mammalian | -0.132           | 2.88E-03 |
| PRKCD           | -0.687 | kinase                               | 0.000            | 2.89E-03 |
| NOS2            |        | enzyme                               | 1.067            | 2.89E-03 |
| Insulin         |        | group                                | 0.046            | 2.89E-03 |

|                                 |        |                                              |                 |          |
|---------------------------------|--------|----------------------------------------------|-----------------|----------|
| PD184352                        |        | chemical drug                                |                 | 2.90E-03 |
| CEBPB                           | 0.701  | transcription regu-<br>lator                 | 1.611           | 2.95E-03 |
| losartan potassium              |        | chemical drug                                | -1.387          | 2.96E-03 |
| PRKCE                           | 0.249  | kinase                                       | 0.327           | 3.05E-03 |
| HIF1A                           | 0.604  | transcription regu-<br>lator                 | 0.908           | 3.07E-03 |
| RDH10                           | -0.216 | enzyme                                       |                 | 3.18E-03 |
| ASCL2                           |        | transcription regu-<br>lator                 |                 | 3.18E-03 |
| HCRT                            |        | other                                        |                 | 3.18E-03 |
| ABCC4                           | 1.291  | transporter                                  |                 | 3.18E-03 |
| FERMT1                          | -0.688 | other                                        |                 | 3.18E-03 |
| PROK1                           |        | growth factor                                |                 | 3.18E-03 |
| casticin                        |        | chemical - endog-<br>enous non-<br>mammalian |                 | 3.18E-03 |
| DVL2                            | -0.053 | other                                        |                 | 3.18E-03 |
| VGF                             |        | growth factor                                |                 | 3.18E-03 |
| gliotoxin                       |        | chemical toxicant                            |                 | 3.18E-03 |
| Muscarinic cholinergic receptor |        | group                                        |                 | 3.18E-03 |
| androstenedione                 |        | chemical - endog-<br>enous mammalian         |                 | 3.18E-03 |
| DNMT3A                          | 0.042  | enzyme                                       | 0.956           | 3.19E-03 |
| TGFB3                           | 0.513  | growth factor                                | 0.970           | 3.24E-03 |
| PRL                             |        | cytokine                                     | 0.736           | 3.27E-03 |
| GATA6                           | 0.052  | transcription regu-<br>lator                 | -0.384          | 3.28E-03 |
| risperidone                     |        | chemical drug                                |                 | 3.29E-03 |
| Ikb                             |        | group                                        |                 | 3.29E-03 |
| UCN                             | -0.082 | other                                        |                 | 3.29E-03 |
| DRAP1                           | -0.694 | transcription regu-<br>lator                 |                 | 3.29E-03 |
| tetrachlorodibenzodioxin        |        | chemical toxicant                            | -0.225          | 3.33E-03 |
| RETN                            |        | other                                        | 1.015           | 3.34E-03 |
| TEAD2                           | -0.194 | transcription regu-<br>lator                 |                 | 3.34E-03 |
| IKBKB                           | -0.416 | kinase                                       | Activated 2.578 | 3.35E-03 |
| melatonin                       |        | chemical - endog-<br>enous mammalian         | -1.172          | 3.38E-03 |
| RETNLB                          |        | other                                        | -0.447          | 3.40E-03 |
| TGFA                            | 0.122  | growth factor                                | 0.831           | 3.59E-03 |
| ADRA1A                          |        | G-protein coupled<br>receptor                |                 | 3.59E-03 |
| kainic acid                     |        | chemical toxicant                            | 0.896           | 3.69E-03 |
| UCN-01                          |        | chemical drug                                |                 | 3.70E-03 |
| MTPN                            | 0.213  | transcription regu-<br>lator                 | -0.555          | 3.78E-03 |
| cobalt chloride                 |        | chemical reagent                             | -0.039          | 3.78E-03 |
| NRAS                            | -0.113 | enzyme                                       |                 | 3.83E-03 |
| CBX5                            | -0.382 | transcription regu-                          | -0.447          | 3.84E-03 |

|                            |        |                                 |        |          |
|----------------------------|--------|---------------------------------|--------|----------|
|                            |        | lactor                          |        |          |
| CDKN1B                     | 0.270  | kinase                          | -0.084 | 3.84E-03 |
| cholecalciferol            |        | chemical - endogenous mammalian | 1.595  | 3.84E-03 |
| PML                        | -0.126 | transcription regulator         | 0.954  | 4.09E-03 |
| atrazine                   |        | chemical toxicant               |        | 4.21E-03 |
| NELFCD                     | 0.100  | other                           |        | 4.21E-03 |
| SULT2B1                    |        | enzyme                          |        | 4.21E-03 |
| S100a7a                    |        | other                           |        | 4.21E-03 |
| NUP155                     | -0.709 | transporter                     |        | 4.21E-03 |
| DES                        |        | other                           |        | 4.21E-03 |
| DIABLO                     | 0.227  | other                           |        | 4.21E-03 |
| dantrolene                 |        | chemical drug                   |        | 4.21E-03 |
| raclopride                 |        | chemical drug                   |        | 4.21E-03 |
| alpha-tocopherol succinate |        | chemical drug                   |        | 4.21E-03 |
| N,N-dimethylarginine       |        | chemical - endogenous mammalian |        | 4.21E-03 |
| resveratrol                |        | chemical drug                   | 0.789  | 4.27E-03 |
| 3M-002                     |        | chemical reagent                | 0.000  | 4.34E-03 |
| E2F1                       | -0.878 | transcription regulator         | -0.854 | 4.39E-03 |
| SMO                        | 0.128  | G-protein coupled receptor      |        | 4.41E-03 |
| PTPRJ                      | 0.753  | phosphatase                     | 1.000  | 4.44E-03 |
| ARNT                       | 0.025  | transcription regulator         |        | 4.52E-03 |
| IL1                        |        | group                           | 1.061  | 4.53E-03 |
| SP600125                   |        | chemical - kinase inhibitor     | 0.263  | 4.59E-03 |
| CPE                        | 0.941  | peptidase                       |        | 4.62E-03 |
| isoflurane                 |        | chemical drug                   |        | 4.62E-03 |
| GNAS                       | -0.202 | enzyme                          |        | 4.75E-03 |
| SAFB                       | -0.171 | other                           |        | 4.75E-03 |
| INSR                       | 0.580  | kinase                          | 1.980  | 4.80E-03 |
| TWIST1                     | -0.532 | transcription regulator         | 1.134  | 4.84E-03 |
| MAPK9                      | -0.349 | kinase                          | 0.896  | 4.84E-03 |
| chenodeoxycholic acid      |        | chemical - endogenous mammalian | 1.446  | 4.87E-03 |
| CCL2                       |        | cytokine                        | 0.271  | 4.87E-03 |
| NFYA                       | -0.126 | transcription regulator         |        | 4.87E-03 |
| leukotriene D4             |        | chemical - endogenous mammalian | 1.131  | 5.07E-03 |
| NLRP3                      | 0.989  | other                           | 1.109  | 5.11E-03 |
| LEP                        |        | growth factor                   | -0.470 | 5.12E-03 |
| PRKAR2B                    | 0.267  | kinase                          |        | 5.12E-03 |
| titanium dioxide           |        | chemical drug                   |        | 5.12E-03 |
| SMAD3                      | -0.355 | transcription regulator         | 0.479  | 5.33E-03 |

|                                              |        |                                              |                 |          |
|----------------------------------------------|--------|----------------------------------------------|-----------------|----------|
| <b>garcinol</b>                              |        | chemical - endog-<br>enous non-<br>mammalian | -0.447          | 5.36E-03 |
| <b>novobiocin</b>                            |        | chemical drug                                |                 | 5.36E-03 |
| <b>Mir218</b>                                |        | microRNA                                     |                 | 5.36E-03 |
| <b>Pde</b>                                   |        | group                                        |                 | 5.36E-03 |
| <b>bendamustine</b>                          |        | chemical drug                                |                 | 5.36E-03 |
| <b>SAV1</b>                                  | -0.304 | other                                        |                 | 5.36E-03 |
| <b>SERPINB2</b>                              |        | other                                        |                 | 5.36E-03 |
| <b>NELFA</b>                                 | -0.122 | other                                        |                 | 5.36E-03 |
| <b>MC1R</b>                                  | 0.435  | G-protein coupled<br>receptor                |                 | 5.36E-03 |
| <b>SRD5A1</b>                                | -0.442 | enzyme                                       |                 | 5.36E-03 |
| <b>NELFE</b>                                 | -0.200 | other                                        |                 | 5.36E-03 |
| <b>benazepril</b>                            |        | chemical drug                                |                 | 5.36E-03 |
| <b>BIRC5</b>                                 | -1.547 | other                                        |                 | 5.40E-03 |
| <b>EBI3</b>                                  |        | cytokine                                     | 1.067           | 5.40E-03 |
| <b>CHUK</b>                                  | 0.003  | kinase                                       | Activated 2.158 | 5.58E-03 |
| <b>hydrogen peroxide</b>                     |        | chemical - endog-<br>enous mammalian         | 1.339           | 5.58E-03 |
| <b>S100A6</b>                                | -0.280 | transporter                                  |                 | 5.66E-03 |
| <b>letrozole</b>                             |        | chemical drug                                |                 | 5.66E-03 |
| <b>NOTCH3</b>                                | 0.672  | transcription regu-<br>lator                 |                 | 5.76E-03 |
| <b>luteolin</b>                              |        | chemical drug                                |                 | 5.76E-03 |
| <b>RASSF1</b>                                | -0.751 | other                                        | Activated 2.200 | 5.89E-03 |
| <b>KLF11</b>                                 | -0.514 | transcription regu-<br>lator                 |                 | 5.91E-03 |
| <b>MAPK8</b>                                 | 0.084  | kinase                                       | 1.452           | 6.06E-03 |
| <b>pioglitazone</b>                          |        | chemical drug                                | -1.351          | 6.06E-03 |
| <b>CCL11</b>                                 |        | cytokine                                     | -1.977          | 6.12E-03 |
| <b>EGFR</b>                                  | 0.108  | kinase                                       | -0.351          | 6.16E-03 |
| <b>SLC13A1</b>                               |        | transporter                                  | 1.342           | 6.16E-03 |
| <b>vinblastine</b>                           |        | chemical drug                                |                 | 6.23E-03 |
| <b>THRB</b>                                  | 0.122  | ligand-dependent<br>nuclear receptor         |                 | 6.39E-03 |
| <b>LIF</b>                                   | 0.228  | cytokine                                     | 0.426           | 6.39E-03 |
| <b>emodin</b>                                |        | chemical drug                                | 0.577           | 6.50E-03 |
| <b>CSF1</b>                                  | -0.590 | cytokine                                     | -1.942          | 6.57E-03 |
| <b>6-mercaptopurine</b>                      |        | chemical drug                                |                 | 6.65E-03 |
| <b>O6-benzylguanine</b>                      |        | chemical drug                                |                 | 6.65E-03 |
| <b>niclosamide</b>                           |        | chemical drug                                |                 | 6.65E-03 |
| <b>PF-3084014</b>                            |        | chemical drug                                |                 | 6.65E-03 |
| <b>RANBP9</b>                                | 0.007  | other                                        |                 | 6.65E-03 |
| <b>TFR2</b>                                  |        | transporter                                  |                 | 6.65E-03 |
| <b>SIK1/SIK1B</b>                            | 1.156  | kinase                                       |                 | 6.65E-03 |
| <b>premarin</b>                              |        | chemical drug                                |                 | 6.65E-03 |
| <b>farglitazar</b>                           |        | chemical drug                                |                 | 6.65E-03 |
| <b>levamisole</b>                            |        | chemical drug                                |                 | 6.65E-03 |
| <b>PDLIM2</b>                                | -0.069 | other                                        | -0.277          | 6.74E-03 |
| <b>miR-146a-5p (and other miRNAs w/seed)</b> |        | mature microRNA                              | 1.342           | 6.74E-03 |



|                                                     |        |                                   |           |          |          |
|-----------------------------------------------------|--------|-----------------------------------|-----------|----------|----------|
| <b>GAGAACU)</b>                                     |        |                                   |           |          |          |
| <b>FGFR1</b>                                        | -0.510 | kinase                            | -1.000    | 6.74E-03 |          |
| <b>mir-223</b>                                      |        | microRNA                          | 1.387     | 6.84E-03 |          |
| <b>SRSF1</b>                                        | -0.235 | other                             |           | 6.84E-03 |          |
| <b>PRKAR1A</b>                                      | 0.279  | kinase                            |           | 6.84E-03 |          |
| <b>betulinic acid</b>                               |        | chemical drug                     |           | 6.84E-03 |          |
| <b>vorinostat</b>                                   |        | chemical drug                     | 1.269     | 6.96E-03 |          |
| <b>Ca2+</b>                                         |        | chemical - endogenous mammalian   | 0.878     | 6.96E-03 |          |
| <b>PPIF</b>                                         | -0.121 | enzyme                            | -1.342    | 7.04E-03 |          |
| <b>HDAC2</b>                                        | -0.126 | transcription regulator           | 1.000     | 7.34E-03 |          |
| <b>ATF3</b>                                         | -0.977 | transcription regulator           | 0.594     | 7.35E-03 |          |
| <b>grape seed extract</b>                           |        | chemical drug                     |           | 7.48E-03 |          |
| <b>NPY</b>                                          | 1.834  | other                             |           | 7.48E-03 |          |
| <b>NOSTRIN</b>                                      | 1.067  | transcription regulator           |           | 7.48E-03 |          |
| <b>olanzapine</b>                                   |        | chemical drug                     | -0.365    | 7.68E-03 |          |
| <b>Ifn gamma</b>                                    |        | complex                           | 1.446     | 8.01E-03 |          |
| <b>C9orf72</b>                                      | 0.079  | other                             |           | 8.06E-03 |          |
| <b>vismodegib</b>                                   |        | chemical drug                     |           | 8.06E-03 |          |
| <b>TCF21</b>                                        |        | transcription regulator           |           | 8.06E-03 |          |
| <b>TBX1</b>                                         |        | transcription regulator           |           | 8.06E-03 |          |
| <b>HLF</b>                                          |        | transcription regulator           |           | 8.06E-03 |          |
| <b>S100A7</b>                                       |        | other                             |           | 8.06E-03 |          |
| <b>STMN1</b>                                        | -0.915 | other                             |           | 8.06E-03 |          |
| <b>CA074-methyl ester</b>                           |        | chemical reagent                  |           | 8.06E-03 |          |
| <b>puerarin</b>                                     |        | chemical drug                     |           | 8.06E-03 |          |
| <b>canrenoate potassium</b>                         |        | chemical drug                     |           | 8.06E-03 |          |
| <b>IKBKG</b>                                        | 0.021  | kinase                            | Activated | 2.425    | 8.14E-03 |
| <b>NRG1</b>                                         | 0.453  | growth factor                     |           | 1.421    | 8.50E-03 |
| <b>topotecan</b>                                    |        | chemical drug                     |           | 0.239    | 8.66E-03 |
| <b>STAT5a/b</b>                                     |        | group                             |           | -0.757   | 8.70E-03 |
| <b>epigallocatechin-gallate</b>                     |        | chemical drug                     |           | 0.674    | 8.72E-03 |
| <b>ZBED6</b>                                        | 0.175  | transcription regulator           |           |          | 8.86E-03 |
| <b>PAK1</b>                                         | -0.567 | kinase                            |           |          | 8.86E-03 |
| <b>alvocidib</b>                                    |        | chemical drug                     |           |          | 8.86E-03 |
| <b>15-deoxy-delta-12,14 -PGJ 2</b>                  |        | chemical - endogenous mammalian   | -0.349    |          | 8.91E-03 |
| <b>HRAS</b>                                         | -0.035 | enzyme                            | -1.485    |          | 9.04E-03 |
| <b>12-(3-adamantan-1-yl-ureido) dodecanoic acid</b> |        | chemical reagent                  | 0.577     |          | 9.13E-03 |
| <b>folic acid</b>                                   |        | chemical - endogenous mammalian   | 0.218     |          | 9.13E-03 |
| <b>PGR</b>                                          | 0.181  | ligand-dependent nuclear receptor | 1.910     |          | 9.14E-03 |

|                                                 |        |                                     |        |          |
|-------------------------------------------------|--------|-------------------------------------|--------|----------|
| ionomycin                                       |        | chemical reagent                    | 0.118  | 9.16E-03 |
| PTEN                                            | 0.153  | phosphatase                         | 1.856  | 9.17E-03 |
| 2-amino-5-phosphonovaleric acid                 |        | chemical - other    Inhibited       | -2.433 | 9.30E-03 |
| prednisolone                                    |        | chemical drug    Activated          | 2.121  | 9.39E-03 |
| embelin                                         |        | chemical - endogenous non-mammalian |        | 9.59E-03 |
| WP1066                                          |        | chemical drug                       |        | 9.59E-03 |
| WWC1                                            | 0.748  | transcription regulator             |        | 9.59E-03 |
| RGS2                                            | 1.819  | other                               |        | 9.59E-03 |
| PRAME                                           | -0.124 | other                               |        | 9.59E-03 |
| HSF4                                            | 0.211  | transcription regulator             |        | 9.59E-03 |
| CDH5                                            |        | other                               |        | 9.59E-03 |
| quinacrine                                      |        | chemical drug                       |        | 9.59E-03 |
| nordihydroguaiaretic acid                       |        | chemical drug                       |        | 9.59E-03 |
| CYP27B1                                         | -0.002 | enzyme                              |        | 9.60E-03 |
| sildenafil                                      |        | chemical drug                       |        | 9.60E-03 |
| sulindac                                        |        | chemical drug                       |        | 9.62E-03 |
| cytarabine                                      |        | chemical drug                       |        | 9.62E-03 |
| lovastatin                                      |        | chemical drug                       | -0.035 | 9.92E-03 |
| HAND2                                           | 0.522  | transcription regulator             |        | 1.01E-02 |
| SMARCA2                                         | 0.029  | transcription regulator             |        | 1.01E-02 |
| sodium chloride                                 |        | chemical - endogenous mammalian     | 1.995  | 1.01E-02 |
| NFATC1                                          | -0.411 | transcription regulator             | -0.061 | 1.02E-02 |
| PDX1                                            |        | transcription regulator             | -1.000 | 1.02E-02 |
| ethanol                                         |        | chemical - endogenous mammalian     | -0.497 | 1.03E-02 |
| 8-bromoguanosine 3',5'-cyclic monophosphate     |        | chemical - kinase inhibitor         |        | 1.04E-02 |
| IL27                                            |        | cytokine    Activated               | 2.391  | 1.06E-02 |
| IL15                                            | 0.308  | cytokine                            | 0.858  | 1.06E-02 |
| estradiol benzoate                              |        | chemical drug                       |        | 1.07E-02 |
| camptothecin                                    |        | chemical drug                       | -1.255 | 1.08E-02 |
| CCN2                                            | 0.329  | growth factor                       | 1.067  | 1.10E-02 |
| Akt                                             |        | group                               | -1.231 | 1.11E-02 |
| STAT5A                                          | 0.995  | transcription regulator             |        | 1.11E-02 |
| bortezomib                                      |        | chemical drug                       | 0.375  | 1.11E-02 |
| MSX2                                            | -0.942 | transcription regulator             |        | 1.12E-02 |
| Yaf2                                            |        | transcription regulator             |        | 1.12E-02 |
| 4-methylnitrosoamino-1-(3-pyridinyl)-1-butanone |        | chemical toxicant                   |        | 1.12E-02 |

|                              |        |                                     |                 |          |
|------------------------------|--------|-------------------------------------|-----------------|----------|
| lipoteichoic acid            |        | chemical - endogenous non-mammalian |                 | 1.12E-02 |
| D-alpha-tocopheryl succinate |        | chemical reagent                    |                 | 1.12E-02 |
| YWHAQ                        | -0.361 | other                               |                 | 1.12E-02 |
| CTSG                         |        | peptidase                           |                 | 1.12E-02 |
| RBP1                         | 0.329  | transporter                         |                 | 1.12E-02 |
| BHLHE41                      | -0.526 | transcription regulator             |                 | 1.12E-02 |
| phencyclidine                |        | chemical drug                       |                 | 1.12E-02 |
| hormone                      |        | chemical drug                       |                 | 1.12E-02 |
| maxacalcitol                 |        | chemical drug                       |                 | 1.12E-02 |
| estrogen receptor            |        | group                               | -0.113          | 1.14E-02 |
| SMAD4                        | -0.013 | transcription regulator             | -0.762          | 1.14E-02 |
| bexarotene                   |        | chemical drug                       | 0.174           | 1.14E-02 |
| thapsigargin                 |        | chemical toxicant                   | 0.033           | 1.14E-02 |
| IFNG                         |        | cytokine                            | Activated 2.018 | 1.14E-02 |
| CREBBP                       | -0.151 | transcription regulator             |                 | 1.15E-02 |
| MAP2K1                       | 0.081  | kinase                              | -0.218          | 1.17E-02 |
| mir-34                       |        | microRNA                            | 1.924           | 1.18E-02 |
| AKT1                         | -0.157 | kinase                              |                 | 1.18E-02 |
| fatty acid                   |        | chemical - endogenous mammalian     | 1.951           | 1.19E-02 |
| NQO1                         | -0.014 | enzyme                              |                 | 1.20E-02 |
| mevalonic acid               |        | chemical - endogenous mammalian     |                 | 1.20E-02 |
| CEBPA                        | -0.450 | transcription regulator             | 0.680           | 1.23E-02 |
| GATA1                        |        | transcription regulator             | 0.000           | 1.26E-02 |
| endocannabinoid              |        | chemical - endogenous mammalian     |                 | 1.26E-02 |
| ZYG11B                       | 0.076  | other                               |                 | 1.26E-02 |
| Ca2 ATPase                   |        | group                               |                 | 1.26E-02 |
| Hdac1/2                      |        | group                               |                 | 1.26E-02 |
| SNHG1                        | -0.570 | other                               |                 | 1.26E-02 |
| mecarazole                   |        | chemical drug                       |                 | 1.26E-02 |
| sodium thiosulfate           |        | chemical drug                       |                 | 1.26E-02 |
| CYP2R1                       | -0.326 | enzyme                              |                 | 1.26E-02 |
| FBXL7                        | 0.069  | enzyme                              |                 | 1.26E-02 |
| HJURP                        | -1.722 | other                               |                 | 1.26E-02 |
| DNAJA4                       | -0.671 | other                               |                 | 1.26E-02 |
| RGN                          |        | enzyme                              |                 | 1.26E-02 |
| CD3-TCR                      |        | complex                             |                 | 1.26E-02 |
| SNHG7                        | 0.002  | other                               |                 | 1.26E-02 |
| ASPSCR1                      | 0.061  | other                               |                 | 1.26E-02 |
| MARCH6                       | 0.333  | enzyme                              |                 | 1.26E-02 |
| SGMS2                        | -0.340 | enzyme                              |                 | 1.26E-02 |
| linsitinib                   |        | chemical drug                       |                 | 1.26E-02 |

|                                                 |        |                             |          |
|-------------------------------------------------|--------|-----------------------------|----------|
| HSPA6                                           |        | enzyme                      | 1.26E-02 |
| ASB7                                            | 0.342  | other                       | 1.26E-02 |
| JPH2                                            | -0.697 | enzyme                      | 1.26E-02 |
| SIRT5                                           | 0.172  | enzyme                      | 1.26E-02 |
| METAP2                                          | -0.169 | peptidase                   | 1.26E-02 |
| ZYG11A                                          | -1.117 | other                       | 1.26E-02 |
| amuvatinib                                      |        | chemical drug               | 1.26E-02 |
| proprotein convertase                           |        | group                       | 1.26E-02 |
| voxtalisib                                      |        | chemical drug               | 1.26E-02 |
| TNNC1                                           |        | other                       | 1.26E-02 |
| NAPA                                            | 0.124  | transporter                 | 1.26E-02 |
| miR-302b-5p (and other miRNAs w/seed CUUUAAC)   |        | mature microRNA             | 1.26E-02 |
| miR-381-3p (and other miRNAs w/seed AUACAAG)    |        | mature microRNA             | 1.26E-02 |
| miR-181a-1-3p (and other miRNAs w/seed CCAUCGA) |        | mature microRNA             | 1.26E-02 |
| mir-463                                         |        | microRNA                    | 1.26E-02 |
| mir-340                                         |        | microRNA                    | 1.26E-02 |
| mir-471                                         |        | microRNA                    | 1.26E-02 |
| DYNLT3                                          | 0.314  | other                       | 1.26E-02 |
| SCD5                                            | 0.091  | enzyme                      | 1.26E-02 |
| KCNA1                                           |        | ion channel                 | 1.26E-02 |
| TNR                                             |        | other                       | 1.26E-02 |
| NUDT21                                          | -0.566 | other                       | 1.26E-02 |
| DSG2                                            | -0.048 | other                       | 1.26E-02 |
| RIT1                                            | -0.031 | enzyme                      | 1.26E-02 |
| TBXAS1                                          | -0.933 | enzyme                      | 1.26E-02 |
| MPT0B214                                        |        | chemical reagent            | 1.26E-02 |
| CDC23                                           | -0.374 | enzyme                      | 1.26E-02 |
| ITIH4                                           |        | other                       | 1.26E-02 |
| SIRT1/2 inhibitor VII                           |        | chemical reagent            | 1.26E-02 |
| TPD52                                           | 0.426  | other                       | 1.26E-02 |
| ALYREF                                          | -0.718 | transcription regulator     | 1.26E-02 |
| COX7A2                                          | -0.057 | enzyme                      | 1.26E-02 |
| HMGN5                                           | 0.426  | transcription regulator     | 1.26E-02 |
| pharmacoperone IN3                              |        | chemical reagent            | 1.26E-02 |
| IGHMBP2                                         | 0.082  | enzyme                      | 1.26E-02 |
| SR11256                                         |        | chemical reagent            | 1.26E-02 |
| CWP232228                                       |        | chemical reagent            | 1.26E-02 |
| chlordan                                        |        | chemical toxicant           | 1.26E-02 |
| proadifen                                       |        | chemical reagent            | 1.26E-02 |
| guanethidine                                    |        | chemical drug               | 1.26E-02 |
| darifenacin                                     |        | chemical drug               | 1.26E-02 |
| 2,5-dihydroxymethylcinnamate                    |        | chemical - kinase inhibitor | 1.26E-02 |
| benomyl                                         |        | chemical toxicant           | 1.26E-02 |
| EPI-002                                         |        | chemical reagent            | 1.26E-02 |
| melarsoprol                                     |        | chemical drug               | 1.26E-02 |

|                                               |        |                                   |        |          |
|-----------------------------------------------|--------|-----------------------------------|--------|----------|
| trichlorfon                                   |        | chemical toxicant                 |        | 1.26E-02 |
| fadrozole                                     |        | chemical drug                     |        | 1.26E-02 |
| hedamycin                                     |        | chemical reagent                  |        | 1.26E-02 |
| gallamine triethiodide                        |        | chemical drug                     |        | 1.26E-02 |
| AuNP@PEG@e14a2                                |        | chemical reagent                  |        | 1.26E-02 |
| BMS200261                                     |        | chemical reagent                  |        | 1.26E-02 |
| Gly-Gln                                       |        | chemical reagent                  |        | 1.26E-02 |
| 2,3-dichloro-5,8-dihydroxy-1,4-naphthoquinone |        | chemical toxicant                 |        | 1.26E-02 |
| alcuronium                                    |        | chemical drug                     |        | 1.26E-02 |
| becaplermin                                   |        | biologic drug                     |        | 1.26E-02 |
| hydrocortisone phosphate                      |        | chemical drug                     |        | 1.26E-02 |
| 6alpha-fluorotestosterone                     |        | chemical toxicant                 |        | 1.26E-02 |
| PI3K (complex)                                |        | complex                           | -0.822 | 1.28E-02 |
| ATP7B                                         | 0.907  | transporter                       |        | 1.29E-02 |
| NR2F1                                         | -0.528 | ligand-dependent nuclear receptor |        | 1.29E-02 |
| cyclopamine                                   |        | chemical reagent                  |        | 1.29E-02 |
| GNA14                                         |        | enzyme                            |        | 1.30E-02 |
| miR-141-3p (and other miRNAs w/seed AACACUG)  |        | mature microRNA                   | -0.061 | 1.30E-02 |
| tyrphostin AG 1478                            |        | chemical - kinase inhibitor       | -0.057 | 1.30E-02 |
| PKD1                                          | 0.141  | ion channel                       | -1.664 | 1.30E-02 |
| GON4L                                         | -0.010 | transcription regulator           |        | 1.30E-02 |
| Ptprd                                         |        | phosphatase                       |        | 1.30E-02 |
| PECAM1                                        | -0.669 | other                             |        | 1.30E-02 |
| Betacatenin/TCF                               |        | complex                           |        | 1.30E-02 |
| NDUFA13                                       | -0.035 | enzyme                            |        | 1.30E-02 |
| IQGAP2                                        | -0.412 | other                             |        | 1.30E-02 |
| TGFBR3                                        | -0.384 | kinase                            |        | 1.30E-02 |
| cetrorelix                                    |        | biologic drug                     |        | 1.30E-02 |
| aphidicolin                                   |        | chemical toxicant                 |        | 1.30E-02 |
| selenite                                      |        | chemical toxicant                 |        | 1.30E-02 |
| zeranol                                       |        | chemical - endogenous mammalian   |        | 1.30E-02 |
| noscapine                                     |        | chemical drug                     |        | 1.30E-02 |
| growth factor                                 |        | group                             |        | 1.30E-02 |
| onapristone                                   |        | chemical drug                     |        | 1.30E-02 |
| SOX1                                          |        | transcription regulator           | 0.000  | 1.36E-02 |
| tacrolimus                                    |        | chemical drug                     | -0.000 | 1.36E-02 |
| EDN1                                          | 1.834  | cytokine                          | 0.650  | 1.36E-02 |
| CEACAM1                                       |        | transporter                       |        | 1.38E-02 |
| DACH1                                         | 0.208  | transcription regulator           |        | 1.38E-02 |
| FLT3                                          |        | kinase                            |        | 1.38E-02 |
| LG100268                                      |        | chemical reagent                  |        | 1.38E-02 |
| REST                                          | -0.046 | transcription regulator           | -1.032 | 1.39E-02 |

|                                                     |        |                                     |                 |
|-----------------------------------------------------|--------|-------------------------------------|-----------------|
| <b>black raspberry extract</b>                      |        | chemical drug                       | 1.42E-02        |
| <b>hyaluronic acid</b>                              |        | chemical - endogenous mammalian     | -0.520 1.47E-02 |
| <b>NR0B1</b>                                        |        | ligand-dependent nuclear receptor   | 1.48E-02        |
| <b>benzyl isothiocyanate</b>                        |        | chemical - endogenous non-mammalian | 1.48E-02        |
| <b>Bvht</b>                                         |        | other                               | 1.000 1.49E-02  |
| <b>NTRK2</b>                                        |        | kinase                              | 1.49E-02        |
| <b>lonafarnib</b>                                   |        | chemical drug                       | 1.49E-02        |
| <b>1'-acetoxychavicol acetate</b>                   |        | chemical reagent                    | 1.49E-02        |
| <b>miR-19b-3p (and other miRNAs w/seed GUGCAAA)</b> |        | mature microRNA                     | 1.49E-02        |
| <b>mir-199</b>                                      |        | microRNA                            | 1.49E-02        |
| <b>mir-154</b>                                      |        | microRNA                            | 1.49E-02        |
| <b>RFX5</b>                                         | 0.211  | transcription regulator             | 1.49E-02        |
| <b>perindopril</b>                                  |        | chemical drug                       | 1.49E-02        |
| <b>pyridoxine</b>                                   |        | chemical - endogenous mammalian     | 1.49E-02        |
| <b>asiatic acid</b>                                 |        | chemical reagent                    | 1.49E-02        |
| <b>24-hydroxycholesterol</b>                        |        | chemical - endogenous mammalian     | 1.49E-02        |
| <b>MAP2K6</b>                                       | 0.190  | kinase                              | 1.55E-02        |
| <b>triptolide</b>                                   |        | chemical drug                       | 1.55E-02        |
| <b>epinephrine</b>                                  |        | chemical - endogenous mammalian     | 1.55E-02        |
| <b>NAMPT</b>                                        | 0.274  | cytokine                            | 1.58E-02        |
| <b>CD2</b>                                          |        | transmembrane receptor              | 1.58E-02        |
| <b>NFYC</b>                                         | -0.108 | transcription regulator             | 1.58E-02        |
| <b>NKX2-5</b>                                       |        | transcription regulator             | 1.58E-02        |
| <b>HOXC6</b>                                        | -0.042 | transcription regulator             | 1.58E-02        |
| <b>testosterone</b>                                 |        | chemical - endogenous mammalian     | 1.569 1.61E-02  |
| <b>paclitaxel</b>                                   |        | chemical drug                       | 0.330 1.62E-02  |
| <b>PD173074</b>                                     |        | chemical reagent                    | 1.000 1.62E-02  |
| <b>Notch</b>                                        |        | group                               | 1.62E-02        |
| <b>AHR</b>                                          | 0.290  | ligand-dependent nuclear receptor   | 0.861 1.63E-02  |
| <b>isobutylmethylxanthine</b>                       |        | chemical toxicant                   | 1.812 1.66E-02  |
| <b>ACVR1</b>                                        | -0.009 | kinase                              | 1.68E-02        |
| <b>GABPA</b>                                        | 0.024  | transcription regulator             | 1.68E-02        |
| <b>GSK2816126</b>                                   |        | chemical drug                       | 1.68E-02        |
| <b>CDK2AP1</b>                                      | -0.237 | other                               | 1.68E-02        |
| <b>baicalein</b>                                    |        | chemical drug                       | 1.68E-02        |

|                                            |        |                                          |        |          |
|--------------------------------------------|--------|------------------------------------------|--------|----------|
| CGB3 (includes others)                     |        | other                                    |        | 1.69E-02 |
| CHEK2                                      | -0.275 | kinase                                   |        | 1.69E-02 |
| NKX6-1                                     | -0.861 | transcription regu-<br>lator             |        | 1.69E-02 |
| HDAC9                                      | -0.294 | transcription regu-<br>lator             |        | 1.69E-02 |
| CBX3                                       | -0.228 | transcription regu-<br>lator             |        | 1.69E-02 |
| aroclor 1254                               |        | chemical toxicant                        |        | 1.69E-02 |
| 4-nitroquinoline-1-oxide                   |        | chemical toxicant                        |        | 1.69E-02 |
| cystamine                                  |        | chemical drug                            |        | 1.69E-02 |
| 27-hydroxycholesterol                      |        | chemical - endog-<br>enous mammalian     |        | 1.69E-02 |
| staurosporine                              |        | chemical - kinase<br>inhibitor           | 1.446  | 1.69E-02 |
| oleic acid                                 |        | chemical - endog-<br>enous mammalian     | -1.432 | 1.69E-02 |
| ROR2                                       | 0.256  | kinase                                   |        | 1.69E-02 |
| IgG                                        |        | complex                                  | -0.697 | 1.74E-02 |
| VCAN                                       | 0.527  | other                                    | 0.000  | 1.74E-02 |
| EIF4E                                      | -0.132 | translation regula-<br>tor               | -1.342 | 1.74E-02 |
| 1,4-bis[2-(3,5-dichloropyridyloxy)]benzene |        | chemical toxicant                        | -0.322 | 1.74E-02 |
| SP2509                                     |        | chemical reagent   Activated             | 3.000  | 1.75E-02 |
| SOX2                                       |        | transcription regu-<br>lator             | 1.067  | 1.78E-02 |
| ANGPT1                                     | 1.770  | growth factor                            |        | 1.79E-02 |
| ILK                                        | -0.200 | kinase                                   |        | 1.79E-02 |
| advanced glycation end-products            |        | chemical - endog-<br>enous mammalian     |        | 1.79E-02 |
| MECP2                                      | 0.115  | transcription regu-<br>lator             |        | 1.80E-02 |
| metformin                                  |        | chemical drug   Inhibited                | -2.200 | 1.83E-02 |
| MYC                                        | -0.071 | transcription regu-<br>lator   Inhibited | -2.976 | 1.84E-02 |
| SOX3                                       |        | transcription regu-<br>lator             | 0.000  | 1.84E-02 |
| ciglitazone                                |        | chemical drug                            |        | 1.84E-02 |
| N-Ac-Leu-Leu-norleucinal                   |        | chemical - prote-<br>ase inhibitor       |        | 1.84E-02 |
| R5020                                      |        | chemical reagent                         |        | 1.84E-02 |
| methylprednisolone                         |        | chemical drug                            | 1.930  | 1.86E-02 |
| AMPK                                       |        | complex                                  | 1.131  | 1.86E-02 |
| MYB                                        |        | transcription regu-<br>lator             | -0.839 | 1.88E-02 |
| cryptotanshinone                           |        | chemical drug                            |        | 1.90E-02 |
| Angiotensin II receptor type 1             |        | group                                    |        | 1.90E-02 |
| GIP                                        |        | other                                    |        | 1.90E-02 |
| MXI1                                       | 0.357  | transcription regu-<br>lator             |        | 1.90E-02 |
| DAXX                                       | -0.402 | transcription regu-                      |        | 1.90E-02 |

|                                                                                   |        |                                     |        |          |
|-----------------------------------------------------------------------------------|--------|-------------------------------------|--------|----------|
|                                                                                   |        | lactor                              |        |          |
| <b>IL19</b>                                                                       |        | cytokine                            |        | 1.90E-02 |
| <b>actinonin</b>                                                                  |        | chemical reagent                    |        | 1.90E-02 |
| <b>zearalenone</b>                                                                |        | chemical toxicant                   |        | 1.90E-02 |
| <b>K+</b>                                                                         |        | chemical - endogenous mammalian     |        | 1.90E-02 |
| <b>valproic acid</b>                                                              |        | chemical drug                       | 0.743  | 1.91E-02 |
| <b>celecoxib</b>                                                                  |        | chemical drug                       | 1.683  | 1.92E-02 |
| <b>NOTCH1</b>                                                                     | -0.130 | transcription regulator             | -0.304 | 1.95E-02 |
| <b>Jnk</b>                                                                        |        | group                               | 0.342  | 1.99E-02 |
| <b>spironolactone</b>                                                             |        | chemical drug                       | -1.000 | 2.00E-02 |
| <b>SMAD1</b>                                                                      | -0.239 | transcription regulator             |        | 2.01E-02 |
| <b>KAT6A</b>                                                                      | -0.030 | enzyme                              |        | 2.01E-02 |
| <b>ABCA1</b>                                                                      | 0.227  | transporter                         |        | 2.01E-02 |
| <b>Foxp1</b>                                                                      |        | transcription regulator             |        | 2.01E-02 |
| <b>GMNN</b>                                                                       | -1.018 | transcription regulator             | 0.000  | 2.08E-02 |
| <b>TRAF2</b>                                                                      | -0.397 | enzyme                              | -1.987 | 2.08E-02 |
| <b>TFRC</b>                                                                       | 0.097  | transporter                         |        | 2.08E-02 |
| <b>FGF1</b>                                                                       | -1.644 | growth factor                       | -0.669 | 2.11E-02 |
| <b>Fgfr</b>                                                                       |        | group                               |        | 2.12E-02 |
| <b>Pdgf Ab</b>                                                                    |        | complex                             |        | 2.12E-02 |
| <b>hemoglobin</b>                                                                 |        | complex                             |        | 2.12E-02 |
| <b>S100B</b>                                                                      |        | other                               |        | 2.12E-02 |
| <b>CDK1</b>                                                                       | -1.310 | kinase                              |        | 2.12E-02 |
| <b>PLCG2</b>                                                                      |        | enzyme                              |        | 2.12E-02 |
| <b>ARHGDIG</b>                                                                    |        | other                               |        | 2.12E-02 |
| <b>ITGA6</b>                                                                      | -0.430 | transmembrane receptor              |        | 2.12E-02 |
| <b>KLRC4-KLRK1/KLRK1</b>                                                          |        | transmembrane receptor              |        | 2.12E-02 |
| <b>ACTN4</b>                                                                      | -0.361 | transcription regulator             |        | 2.12E-02 |
| <b>NCR2</b>                                                                       |        | transmembrane receptor              |        | 2.12E-02 |
| <b>antimycin A</b>                                                                |        | chemical - endogenous non-mammalian |        | 2.12E-02 |
| <b>sertraline</b>                                                                 |        | chemical drug                       |        | 2.12E-02 |
| <b>glycyrrhetic acid</b>                                                          |        | chemical drug                       |        | 2.12E-02 |
| <b>pilocarpine</b>                                                                |        | chemical drug                       |        | 2.12E-02 |
| <b>Sb202190</b>                                                                   |        | chemical - kinase inhibitor         | -1.400 | 2.17E-02 |
| <b>5-O-myceryl-beta-araf-(1-&gt;2)-5-O-myceryl-alpha-araf-(1-&gt;1')-glycerol</b> |        | chemical - endogenous non-mammalian | 1.000  | 2.25E-02 |
| <b>FGF19</b>                                                                      |        | growth factor                       |        | 2.25E-02 |
| <b>lithium</b>                                                                    |        | chemical drug                       | -1.992 | 2.25E-02 |



|                                                                        |        |                                              |        |          |
|------------------------------------------------------------------------|--------|----------------------------------------------|--------|----------|
| TP63                                                                   |        | transcription regu-<br>lator                 | -0.694 | 2.32E-02 |
| EPAS1                                                                  | -0.008 | transcription regu-<br>lator                 | 0.051  | 2.32E-02 |
| Z-LLL-CHO                                                              |        | chemical - prote-<br>ase inhibitor           | -1.020 | 2.33E-02 |
| flutamide                                                              |        | chemical drug                                |        | 2.34E-02 |
| TLX3                                                                   |        | transcription regu-<br>lator                 |        | 2.35E-02 |
| TET3                                                                   | -0.549 | enzyme                                       |        | 2.35E-02 |
| artesunic acid                                                         |        | chemical drug                                |        | 2.35E-02 |
| CCK                                                                    |        | other                                        |        | 2.35E-02 |
| miR-486-5p (and other miRNAs w/seed<br>CCUGUAC)                        |        | mature microRNA                              |        | 2.35E-02 |
| GAS5                                                                   | -0.039 | other                                        |        | 2.35E-02 |
| WWOX                                                                   | -0.291 | enzyme                                       |        | 2.35E-02 |
| EPHA2                                                                  | -0.189 | kinase                                       |        | 2.35E-02 |
| isoprenaline                                                           |        | chemical drug                                |        | 2.35E-02 |
| riboflavin                                                             |        | chemical - endog-<br>enous mammalian         |        | 2.35E-02 |
| baicalin                                                               |        | chemical - endog-<br>enous non-<br>mammalian |        | 2.38E-02 |
| ITGA5                                                                  | -0.374 | transmembrane<br>receptor                    |        | 2.38E-02 |
| MAPK7                                                                  | -0.156 | kinase                                       |        | 2.38E-02 |
| ERBB4                                                                  | 0.533  | kinase                                       | -1.964 | 2.42E-02 |
| CSF3                                                                   |        | cytokine                                     | -1.720 | 2.43E-02 |
| 5,6-epoxyeicosatrienoic acid                                           |        | chemical - endog-<br>enous mammalian         |        | 2.50E-02 |
| (6E,8Z,11Z,14Z)-(5S)-5-hydroperoxyeicosa-<br>6,8,11,14-tetraenoic acid |        | chemical - endog-<br>enous mammalian         |        | 2.50E-02 |
| minoxidil                                                              |        | chemical drug                                |        | 2.50E-02 |
| 4-aminopyrazolo(3,4-d)pyrimidine                                       |        | chemical reagent                             |        | 2.50E-02 |
| purvalanol A                                                           |        | chemical reagent                             |        | 2.50E-02 |
| amikacin                                                               |        | chemical drug                                |        | 2.50E-02 |
| 7beta-hydroxycholesterol                                               |        | chemical - endog-<br>enous mammalian         |        | 2.50E-02 |
| MICU1                                                                  | 0.239  | other                                        |        | 2.50E-02 |
| 1,2-dibromo-3-chloropropane                                            |        | chemical toxicant                            |        | 2.50E-02 |
| GST                                                                    |        | complex                                      |        | 2.50E-02 |
| vildagliptin                                                           |        | chemical drug                                |        | 2.50E-02 |
| AEOL-10150                                                             |        | chemical drug                                |        | 2.50E-02 |
| glemanserin                                                            |        | chemical drug                                |        | 2.50E-02 |
| macimorelin                                                            |        | biologic drug                                |        | 2.50E-02 |
| thymol                                                                 |        | chemical reagent                             |        | 2.50E-02 |
| Rab11                                                                  |        | group                                        |        | 2.50E-02 |
| MTNR1A                                                                 |        | G-protein coupled<br>receptor                |        | 2.50E-02 |
| USP15                                                                  | 0.145  | peptidase                                    |        | 2.50E-02 |
| PCDH9                                                                  | 0.341  | other                                        |        | 2.50E-02 |

|                                               |        |                                     |          |
|-----------------------------------------------|--------|-------------------------------------|----------|
| hyperoside                                    |        | chemical - endogenous non-mammalian | 2.50E-02 |
| SENP8                                         | -0.549 | peptidase                           | 2.50E-02 |
| DENND1A                                       | 0.263  | other                               | 2.50E-02 |
| alpha-adrenergic receptor                     |        | group                               | 2.50E-02 |
| CP                                            | 0.359  | enzyme                              | 2.50E-02 |
| MTNR1B                                        |        | G-protein coupled receptor          | 2.50E-02 |
| TBX4                                          |        | transcription regulator             | 2.50E-02 |
| Hat                                           |        | complex                             | 2.50E-02 |
| AHSA1                                         | 0.017  | other                               | 2.50E-02 |
| soy isoflavones                               |        | chemical drug                       | 2.50E-02 |
| adrenoceptor                                  |        | group                               | 2.50E-02 |
| CHIR-124                                      |        | chemical reagent                    | 2.50E-02 |
| 1-(3-C-ethynylribopentofuranosyl)cytosine     |        | chemical drug                       | 2.50E-02 |
| LY 518674                                     |        | chemical drug                       | 2.50E-02 |
| bucillamine                                   |        | chemical drug                       | 2.50E-02 |
| STAT-1/2                                      |        | group                               | 2.50E-02 |
| CACYBP                                        | -0.208 | other                               | 2.50E-02 |
| safflor yellow B                              |        | chemical - endogenous non-mammalian | 2.50E-02 |
| NOSIP                                         | -0.170 | other                               | 2.50E-02 |
| KCNJ5                                         |        | ion channel                         | 2.50E-02 |
| NPBWR1                                        |        | G-protein coupled receptor          | 2.50E-02 |
| AFM                                           |        | transporter                         | 2.50E-02 |
| DAPK3                                         | -0.112 | kinase                              | 2.50E-02 |
| HPGD                                          | 0.664  | enzyme                              | 2.50E-02 |
| SYCP3                                         | 0.493  | other                               | 2.50E-02 |
| miR-344d-3p (and other miRNAs w/seed AUAUAAC) |        | mature microRNA                     | 2.50E-02 |
| miR-292-3p (and other miRNAs w/seed AGUGCCG)  |        | mature microRNA                     | 2.50E-02 |
| mir-370                                       |        | microRNA                            | 2.50E-02 |
| mir-153                                       |        | microRNA                            | 2.50E-02 |
| lynestrenol                                   |        | chemical drug                       | 2.50E-02 |
| CCNG1                                         | 0.005  | other                               | 2.50E-02 |
| HIF1A-AS1                                     | 0.601  | other                               | 2.50E-02 |
| PIM                                           |        | group                               | 2.50E-02 |
| ECE1                                          | 0.018  | peptidase                           | 2.50E-02 |
| PFN2                                          | -0.096 | enzyme                              | 2.50E-02 |
| HIPK3                                         | 0.364  | kinase                              | 2.50E-02 |
| PLIN3                                         | -0.119 | other                               | 2.50E-02 |
| MUC16                                         |        | other                               | 2.50E-02 |
| cyclo(iso-Asp-GR)-LLIIKLAKLAKKLAKLAK          |        | chemical reagent                    | 2.50E-02 |
| NTSR2                                         |        | G-protein coupled receptor          | 2.50E-02 |

|                                                                     |        |                                              |          |
|---------------------------------------------------------------------|--------|----------------------------------------------|----------|
| SVIL                                                                | -0.317 | other                                        | 2.50E-02 |
| TH                                                                  |        | enzyme                                       | 2.50E-02 |
| GPBP1                                                               | -0.145 | transcription regu-<br>lator                 | 2.50E-02 |
| PRIMA1                                                              |        | other                                        | 2.50E-02 |
| PNRC1                                                               | 0.397  | other                                        | 2.50E-02 |
| NEU2                                                                |        | enzyme                                       | 2.50E-02 |
| UBE2V1                                                              | -0.078 | transcription regu-<br>lator                 | 2.50E-02 |
| Gm4836 (includes others)                                            |        | other                                        | 2.50E-02 |
| APOC1                                                               | 0.694  | transporter                                  | 2.50E-02 |
| RFX4                                                                |        | transcription regu-<br>lator                 | 2.50E-02 |
| VNN1                                                                |        | enzyme                                       | 2.50E-02 |
| 3830403N18Rik/Xlr                                                   |        | other                                        | 2.50E-02 |
| securinine                                                          |        | chemical reagent                             | 2.50E-02 |
| gamma-secretase inhibitor XX                                        |        | chemical reagent                             | 2.50E-02 |
| S7                                                                  |        | chemical - kinase<br>inhibitor               | 2.50E-02 |
| SI163                                                               |        | chemical - kinase<br>inhibitor               | 2.50E-02 |
| S29                                                                 |        | chemical - kinase<br>inhibitor               | 2.50E-02 |
| daphnoretin                                                         |        | chemical - endog-<br>enous non-<br>mammalian | 2.50E-02 |
| satavaptan                                                          |        | chemical drug                                | 2.50E-02 |
| thimerosal                                                          |        | chemical drug                                | 2.50E-02 |
| XK469                                                               |        | chemical drug                                | 2.50E-02 |
| talipexole                                                          |        | chemical drug                                | 2.50E-02 |
| AN-207                                                              |        | chemical toxicant                            | 2.50E-02 |
| SSR180575                                                           |        | chemical drug                                | 2.50E-02 |
| SD-1008                                                             |        | chemical - kinase<br>inhibitor               | 2.50E-02 |
| lavendustin A                                                       |        | chemical - kinase<br>inhibitor               | 2.50E-02 |
| endomorphin-2                                                       |        | chemical - endog-<br>enous mammalian         | 2.50E-02 |
| isoalantolactone                                                    |        | chemical - endog-<br>enous non-<br>mammalian | 2.50E-02 |
| ingenol-dibenzoate                                                  |        | chemical reagent                             | 2.50E-02 |
| swainsonine                                                         |        | chemical - endog-<br>enous non-<br>mammalian | 2.50E-02 |
| N-methylscopolamine                                                 |        | chemical drug                                | 2.50E-02 |
| 3-keto, N-aminoethyl aminocaproyl dihy-<br>drocinnamoyl cyclopamine |        | chemical reagent                             | 2.50E-02 |
| 22-hydroxycholesterol                                               |        | chemical - endog-<br>enous mammalian         | 2.50E-02 |
| RARG                                                                | -0.010 | ligand-dependent                             | 2.52E-02 |

|                                               |        |                                     |        |          |
|-----------------------------------------------|--------|-------------------------------------|--------|----------|
|                                               |        | nuclear receptor                    |        |          |
| TGFB1                                         | 0.615  | kinase                              | 1.172  | 2.52E-02 |
| APP                                           | 0.340  | other                               | 1.228  | 2.53E-02 |
| mir-486                                       |        | microRNA                            |        | 2.58E-02 |
| AXIN1                                         | 0.067  | other                               |        | 2.58E-02 |
| GABPB1                                        | -0.136 | transcription regulator             |        | 2.58E-02 |
| LY6E                                          | -0.120 | other                               |        | 2.58E-02 |
| NAB2                                          | 0.002  | transcription regulator             |        | 2.58E-02 |
| finasteride                                   |        | chemical drug                       |        | 2.58E-02 |
| miR-291a-3p (and other miRNAs w/seed AAGUGCU) |        | mature microRNA                     | 0.854  | 2.61E-02 |
| methimazole                                   |        | chemical drug                       |        | 2.64E-02 |
| 9,10-dimethyl-1,2-benzanthracene              |        | chemical toxicant                   |        | 2.64E-02 |
| cyclosporin A                                 |        | biologic drug                       | -0.785 | 2.76E-02 |
| POU5F1                                        |        | transcription regulator             | 0.025  | 2.80E-02 |
| phorbol esters                                |        | chemical - other                    | -0.371 | 2.80E-02 |
| phosphate                                     |        | chemical - endogenous mammalian     | -1.091 | 2.80E-02 |
| salinosporamide A                             |        | chemical drug                       |        | 2.83E-02 |
| DCAF1                                         | -0.017 | kinase                              |        | 2.83E-02 |
| PRDM16                                        | 1.506  | transcription regulator             |        | 2.83E-02 |
| XRCC6                                         | -0.304 | enzyme                              |        | 2.83E-02 |
| mir-26                                        |        | microRNA                            |        | 2.83E-02 |
| SOCS6                                         | 0.161  | other                               |        | 2.83E-02 |
| linalool                                      |        | chemical - endogenous non-mammalian |        | 2.83E-02 |
| NFAT5                                         | 0.021  | transcription regulator             | 1.000  | 2.90E-02 |
| SYVN1                                         | 0.455  | transporter                         | -0.447 | 2.90E-02 |
| bromodeoxyuridine                             |        | chemical drug                       |        | 2.91E-02 |
| ADM                                           |        | other                               |        | 2.91E-02 |
| salirasib                                     |        | chemical drug                       |        | 2.91E-02 |
| n-nitrosomethylbenzylamine                    |        | chemical toxicant                   |        | 2.98E-02 |
| YBX1                                          | -0.304 | transcription regulator             |        | 3.00E-02 |
| OGT                                           | 0.251  | enzyme                              | -1.000 | 3.00E-02 |
| IL5                                           |        | cytokine                            | -1.488 | 3.00E-02 |
| DETA-NONOate                                  |        | chemical reagent                    |        | 3.06E-02 |
| PARPBP                                        | -0.910 | other                               |        | 3.09E-02 |
| EIF4G1                                        | -0.090 | translation regulator               |        | 3.09E-02 |
| GADD45A                                       | -0.783 | other                               |        | 3.09E-02 |
| CCN3                                          | 1.415  | growth factor                       |        | 3.09E-02 |
| GRN                                           | 0.251  | growth factor                       |        | 3.09E-02 |
| IL15RA                                        | -0.558 | transmembrane receptor              |        | 3.09E-02 |

|                              |        |                                           |        |          |
|------------------------------|--------|-------------------------------------------|--------|----------|
| wogonin                      |        | chemical - endogenous non-mammalian       |        | 3.09E-02 |
| CALCA                        |        | other                                     |        | 3.11E-02 |
| KMT2A                        | -0.010 | transcription regulator                   |        | 3.11E-02 |
| ITGB1                        | 0.263  | transmembrane receptor                    | -0.786 | 3.15E-02 |
| quercetin                    |        | chemical drug                             | 0.757  | 3.15E-02 |
| CLEC11A                      | 0.102  | growth factor                             |        | 3.20E-02 |
| SIRT1                        | -0.191 | transcription regulator                   | 1.480  | 3.27E-02 |
| bezafibrate                  |        | chemical drug                             | -0.927 | 3.32E-02 |
| THPO                         |        | cytokine                                  |        | 3.35E-02 |
| vitamin D                    |        | chemical drug                             |        | 3.35E-02 |
| pregna-4.17-diene-3.16-dione |        | chemical - endogenous non-mammalian       |        | 3.36E-02 |
| FAM3B                        |        | cytokine                                  |        | 3.36E-02 |
| oxymatrine                   |        | chemical drug                             |        | 3.36E-02 |
| MAP2K5                       | 0.463  | kinase                                    |        | 3.36E-02 |
| CETP                         |        | enzyme                                    |        | 3.36E-02 |
| desipramine                  |        | chemical drug                             |        | 3.36E-02 |
| evodiamine                   |        | chemical - endogenous non-mammalian       |        | 3.36E-02 |
| diallyl trisulfide           |        | chemical - endogenous non-mammalian       |        | 3.36E-02 |
| CNR1                         |        | G-protein coupled receptor                | 1.387  | 3.40E-02 |
| ritonavir                    |        | chemical drug                             |        | 3.40E-02 |
| aldosterone                  |        | chemical - endogenous mammalian Activated | 2.128  | 3.40E-02 |
| BMP6                         | 0.397  | growth factor                             | -0.659 | 3.43E-02 |
| MTOR                         | 0.056  | kinase                                    | 0.640  | 3.44E-02 |
| TLR9                         |        | transmembrane receptor                    | -0.179 | 3.47E-02 |
| ID2                          | 1.227  | transcription regulator                   | 0.577  | 3.50E-02 |
| MAPKAPK2                     | 0.272  | kinase                                    |        | 3.51E-02 |
| CEBPD                        | 1.583  | transcription regulator                   | 0.192  | 3.54E-02 |
| zerumbone                    |        | chemical - endogenous non-mammalian       |        | 3.63E-02 |
| TRPS1                        | 0.278  | transcription regulator                   |        | 3.63E-02 |
| MAP3K3                       | 0.038  | kinase                                    |        | 3.63E-02 |
| LCAT                         | 0.151  | enzyme                                    |        | 3.63E-02 |
| diosgenin                    |        | chemical - endog-                         |        | 3.63E-02 |

|                                                       |        |                                 |          |
|-------------------------------------------------------|--------|---------------------------------|----------|
|                                                       |        | enous non-mammalian             |          |
| <b>Pdgf (complex)</b>                                 |        | complex                         | 1.980    |
| <b>POMC</b>                                           |        | other                           | 1.923    |
| <b>MAP2K4</b>                                         | -0.142 | kinase                          | 3.67E-02 |
| <b>SCD</b>                                            | 0.309  | enzyme                          | 3.67E-02 |
| <b>GW 4064</b>                                        |        | chemical toxicant               | 3.67E-02 |
| <b>CpG oligonucleotide</b>                            |        | chemical drug                   | 3.67E-02 |
| <b>thioguanine</b>                                    |        | chemical drug                   | 3.73E-02 |
| <b>L-tyrosine</b>                                     |        | chemical - endogenous mammalian | 3.73E-02 |
| <b>hyodeoxycholic acid</b>                            |        | chemical - endogenous mammalian | 3.73E-02 |
| <b>chloride</b>                                       |        | chemical - endogenous mammalian | 3.73E-02 |
| <b>1-palmitoyl-2-arachidonoyl-phosphatidylcholine</b> |        | chemical - endogenous mammalian | 3.73E-02 |
| <b>ixabepilone</b>                                    |        | chemical drug                   | 3.73E-02 |
| <b>Cyclin B</b>                                       |        | group                           | 3.73E-02 |
| <b>lipoxygenase</b>                                   |        | group                           | 3.73E-02 |
| <b>sethoxydim</b>                                     |        | chemical toxicant               | 3.73E-02 |
| <b>CFC1/CFC1B</b>                                     |        | other                           | 3.73E-02 |
| <b>muraglitazar</b>                                   |        | chemical drug                   | 3.73E-02 |
| <b>PRAG1</b>                                          | -0.332 | kinase                          | 3.73E-02 |
| <b>CADPS</b>                                          |        | other                           | 3.73E-02 |
| <b>CLTRN</b>                                          |        | other                           | 3.73E-02 |
| <b>FAM168A</b>                                        | 0.315  | other                           | 3.73E-02 |
| <b>SOCS2-AS1</b>                                      | -0.453 | other                           | 3.73E-02 |
| <b>KLF14</b>                                          |        | transcription regulator         | 3.73E-02 |
| <b>LAPTM4B</b>                                        | 0.285  | other                           | 3.73E-02 |
| <b>Integrin alpha 4 beta 1</b>                        |        | complex                         | 3.73E-02 |
| <b>STIL</b>                                           | -1.140 | other                           | 3.73E-02 |
| <b>EXOC3L1</b>                                        | -0.627 | other                           | 3.73E-02 |
| <b>CKLF</b>                                           | -0.683 | cytokine                        | 3.73E-02 |
| <b>Trk Receptor</b>                                   |        | group                           | 3.73E-02 |
| <b>xenon</b>                                          |        | chemical drug                   | 3.73E-02 |
| <b>defibrotide</b>                                    |        | biologic drug                   | 3.73E-02 |
| <b>GEM231</b>                                         |        | chemical drug                   | 3.73E-02 |
| <b>cerebrolysin</b>                                   |        | chemical drug                   | 3.73E-02 |
| <b>RNF144B</b>                                        | -0.456 | enzyme                          | 3.73E-02 |
| <b>PAG1</b>                                           | 0.418  | other                           | 3.73E-02 |
| <b>GSTA4</b>                                          | -0.566 | enzyme                          | 3.73E-02 |
| <b>ARID1B</b>                                         | 0.069  | transcription regulator         | 3.73E-02 |
| <b>MADD</b>                                           | 0.555  | other                           | 3.73E-02 |
| <b>miR-136-5p (miRNAs w/seed CUCCAUU)</b>             |        | mature microRNA                 | 3.73E-02 |
| <b>miR-376a-5p (miRNAs w/seed UAGAUUC)</b>            |        | mature microRNA                 | 3.73E-02 |
| <b>mir-541</b>                                        |        | microRNA                        | 3.73E-02 |
| <b>mir-379</b>                                        |        | microRNA                        | 3.73E-02 |
| <b>miR-153-3p (miRNAs w/seed UGCAUAG)</b>             |        | mature microRNA                 | 3.73E-02 |

|                                                                                                        |        |                                              |          |
|--------------------------------------------------------------------------------------------------------|--------|----------------------------------------------|----------|
| <b>mir-342</b>                                                                                         |        | microRNA                                     | 3.73E-02 |
| <b>miR-224-5p (miRNAs w/seed AAGUCAC)</b>                                                              |        | mature microRNA                              | 3.73E-02 |
| <b>PYCR2</b>                                                                                           | -0.026 | enzyme                                       | 3.73E-02 |
| <b>SCN1B</b>                                                                                           | -0.103 | ion channel                                  | 3.73E-02 |
| <b>NRP2</b>                                                                                            | -0.041 | kinase                                       | 3.73E-02 |
| <b>BMP1</b>                                                                                            | -0.118 | peptidase                                    | 3.73E-02 |
| <b>N4BP1</b>                                                                                           | -0.169 | other                                        | 3.73E-02 |
| <b>S100A1</b>                                                                                          | -0.584 | other                                        | 3.73E-02 |
| <b>SOD3</b>                                                                                            | -0.160 | enzyme                                       | 3.73E-02 |
| <b>ANKRD1</b>                                                                                          | -0.763 | transcription regu-<br>lator                 | 3.73E-02 |
| <b>TRERF1</b>                                                                                          | 0.332  | transcription regu-<br>lator                 | 3.73E-02 |
| <b>CCNL2</b>                                                                                           | -0.037 | other                                        | 3.73E-02 |
| <b>Cdkal1</b>                                                                                          |        | enzyme                                       | 3.73E-02 |
| <b>MAP1S</b>                                                                                           | -0.225 | enzyme                                       | 3.73E-02 |
| <b>AP2A2</b>                                                                                           | 0.038  | transporter                                  | 3.73E-02 |
| <b>EPHA4</b>                                                                                           | -0.519 | kinase                                       | 3.73E-02 |
| <b>VEZF1</b>                                                                                           | -0.169 | transcription regu-<br>lator                 | 3.73E-02 |
| <b>NR2F6</b>                                                                                           | 0.000  | ligand-dependent<br>nuclear receptor         | 3.73E-02 |
| <b>MT3</b>                                                                                             |        | other                                        | 3.73E-02 |
| <b>Rbpjl2</b>                                                                                          |        | other                                        | 3.73E-02 |
| <b>RPL10</b>                                                                                           | -0.022 | translation regula-<br>tor                   | 3.73E-02 |
| <b>BUB1B</b>                                                                                           | -1.945 | kinase                                       | 3.73E-02 |
| <b>IRX1</b>                                                                                            |        | transcription regu-<br>lator                 | 3.73E-02 |
| <b>temocapril</b>                                                                                      |        | chemical reagent                             | 3.73E-02 |
| <b>nilutamide</b>                                                                                      |        | chemical drug                                | 3.73E-02 |
| <b>AA-861</b>                                                                                          |        | chemical reagent                             | 3.73E-02 |
| <b>glyceollin</b>                                                                                      |        | chemical - endog-<br>enous non-<br>mammalian | 3.73E-02 |
| <b>DL-threo-dihydrosphingosine</b>                                                                     |        | chemical - kinase<br>inhibitor               | 3.73E-02 |
| <b>fosbretabulin</b>                                                                                   |        | chemical drug                                | 3.73E-02 |
| <b>pramipexole</b>                                                                                     |        | chemical drug                                | 3.73E-02 |
| <b>pirenzepine</b>                                                                                     |        | chemical drug                                | 3.73E-02 |
| <b>ethyl-3-trifluoromethylbenzyl-alpha-<br/>ketoglutarate</b>                                          |        | chemical reagent                             | 3.73E-02 |
| <b>4-amino-6-hydrazino-7-beta-D-<br/>ribofuranosyl-7H-pyrrolo[2,3-d]-pyrimidine-<br/>5-carboxamide</b> |        | chemical reagent                             | 3.73E-02 |
| <b>lead nitrate</b>                                                                                    |        | chemical toxicant                            | 3.73E-02 |
| <b>imisopasem manganese</b>                                                                            |        | chemical drug                                | 3.73E-02 |
| <b>actinomycin</b>                                                                                     |        | chemical - endog-<br>enous non-<br>mammalian | 3.73E-02 |
| <b>L-JNK inhibitor I</b>                                                                               |        | chemical reagent                             | 3.73E-02 |

|                                                |        |                                     |        |          |
|------------------------------------------------|--------|-------------------------------------|--------|----------|
| phosphoramidon                                 |        | chemical - endogenous non-mammalian |        | 3.73E-02 |
| Z-LEHD-FMK                                     |        | chemical reagent                    |        | 3.73E-02 |
| 10-hydroxycamptothecin                         |        | chemical - endogenous mammalian     |        | 3.73E-02 |
| physostigmine                                  |        | chemical drug                       |        | 3.73E-02 |
| E64                                            |        | chemical - endogenous non-mammalian |        | 3.73E-02 |
| D,L-propargylglycine                           |        | chemical reagent                    |        | 3.73E-02 |
| 2R,4R-4-aminopyrrolidine-2,4-dicarboxylic acid |        | chemical reagent                    |        | 3.73E-02 |
| fosinopril                                     |        | chemical drug                       |        | 3.73E-02 |
| megestrol acetate                              |        | chemical drug                       |        | 3.73E-02 |
| desogestrel                                    |        | chemical drug                       |        | 3.73E-02 |
| TNFSF10                                        | 1.578  | cytokine                            | 1.309  | 3.77E-02 |
| cephaloridine                                  |        | chemical drug                       | 0.000  | 3.77E-02 |
| arachidonic acid                               |        | chemical - endogenous mammalian     | 1.217  | 3.77E-02 |
| rosiglitazone                                  |        | chemical drug                       | -1.223 | 3.80E-02 |
| IL11                                           | 2.098  | cytokine                            |        | 3.83E-02 |
| oxaliplatin                                    |        | chemical drug                       |        | 3.83E-02 |
| sodium arsenite                                |        | chemical drug                       |        | 3.83E-02 |
| dibutyl phthalate                              |        | chemical toxicant                   |        | 3.92E-02 |
| plumbagin                                      |        | chemical toxicant                   |        | 3.92E-02 |
| NMU                                            | -0.622 | other                               |        | 3.92E-02 |
| ACKR3                                          | 0.593  | G-protein coupled receptor          |        | 3.92E-02 |
| BAG1                                           | 0.851  | other                               |        | 3.92E-02 |
| ochratoxin A                                   |        | chemical toxicant                   |        | 3.92E-02 |
| kaempferol                                     |        | chemical toxicant                   |        | 3.92E-02 |
| STAT2                                          | 0.285  | transcription regulator             |        | 3.99E-02 |
| CHD4                                           | 0.058  | enzyme                              |        | 3.99E-02 |
| chloroquine                                    |        | chemical drug                       |        | 3.99E-02 |
| NR1H2                                          | 0.314  | ligand-dependent nuclear receptor   | -0.147 | 4.01E-02 |
| ID3                                            | 0.454  | transcription regulator             | 1.000  | 4.06E-02 |
| ERK1/2                                         |        | group                               | -0.933 | 4.13E-02 |
| F2R                                            | 0.158  | G-protein coupled receptor          | 0.152  | 4.13E-02 |
| PTF1A                                          |        | transcription regulator             |        | 4.16E-02 |
| MUC1                                           | 0.774  | other                               |        | 4.16E-02 |
| mitomycin C                                    |        | chemical drug                       |        | 4.16E-02 |
| Ngf                                            |        | group                               |        | 4.16E-02 |
| SPRY1                                          | 0.700  | other                               |        | 4.21E-02 |
| PLK2                                           | 0.041  | kinase                              |        | 4.21E-02 |
| CASR                                           |        | G-protein coupled                   |        | 4.21E-02 |



|                                             |        |                                     |           |          |
|---------------------------------------------|--------|-------------------------------------|-----------|----------|
|                                             |        | receptor                            |           |          |
| CCNE1                                       | -1.010 | transcription regulator             |           | 4.21E-02 |
| diazoxide                                   |        | chemical drug                       |           | 4.21E-02 |
| cyanocobalamin                              |        | chemical - endogenous mammalian     |           | 4.21E-02 |
| geranylgeranyl pyrophosphate                |        | chemical - endogenous mammalian     |           | 4.21E-02 |
| ELAVL1                                      | -0.233 | other                               | Inhibited | -2.216   |
| STAT1                                       | 0.094  | transcription regulator             |           | 0.798    |
| SMAD7                                       | -0.295 | transcription regulator             |           | 0.555    |
| MAP3K8                                      | 0.078  | kinase                              | Activated | 2.219    |
| geldanamycin                                |        | chemical - endogenous non-mammalian |           | -1.342   |
| miR-17-5p (and other miRNAs w/seed AAAGUGC) |        | mature microRNA                     |           |          |
| E2F6                                        | -0.200 | transcription regulator             |           |          |
| RHO                                         |        | G-protein coupled receptor          |           |          |
| SIN3A                                       | -0.091 | transcription regulator             |           |          |
| seocalcitol                                 |        | chemical drug                       |           |          |
| SNAI1                                       |        | transcription regulator             |           | -1.400   |
| caffeic acid phenethyl ester                |        | chemical drug                       |           |          |
| PRKDC                                       | -0.493 | kinase                              |           |          |
| NOTCH4                                      | -0.622 | transcription regulator             |           |          |
| Saa3                                        |        | other                               |           |          |
| DPP4                                        | -0.167 | peptidase                           |           |          |
| PLK4                                        | -1.051 | kinase                              |           |          |
| diallyl disulfide                           |        | chemical - endogenous non-mammalian |           |          |
| ceramide                                    |        | chemical - endogenous mammalian     |           |          |
| dopamine                                    |        | chemical - endogenous mammalian     |           | -1.982   |
| USF2                                        | 0.197  | transcription regulator             |           |          |
| Ins1                                        |        | other                               |           | 0.086    |
| MET                                         | -0.914 | kinase                              |           | 0.169    |
| GLI2                                        | -0.183 | transcription regulator             |           | -0.911   |
| PDCD1                                       |        | phosphatase                         |           |          |
| 25-hydroxycholesterol                       |        | chemical reagent                    |           |          |
| PPARG                                       | -0.518 | ligand-dependent                    |           | -0.357   |

|                 |        |                                              |                |
|-----------------|--------|----------------------------------------------|----------------|
|                 |        | nuclear receptor                             |                |
| atorvastatin    |        | chemical drug                                | 0.700 4.75E-02 |
| alitretinoin    |        | chemical drug                                | 0.555 4.77E-02 |
| aspirin         |        | chemical drug                                | 1.150 4.77E-02 |
| OSM             |        | cytokine                                     | 1.585 4.78E-02 |
| picrotoxin      |        | chemical toxicant                            | 4.82E-02       |
| apomorphine     |        | chemical drug                                | 4.82E-02       |
| FOXL2           | -0.179 | transcription regu-<br>lator                 | 4.87E-02       |
| NEUROG1         |        | transcription regu-<br>lator                 | 4.87E-02       |
| NRG2            | -0.063 | growth factor                                | 4.87E-02       |
| Go 6976         |        | chemical - kinase<br>inhibitor               | 4.87E-02       |
| prostaglandin E |        | chemical - endog-<br>enous mammalian         | 4.94E-02       |
| flavokawain A   |        | chemical - endog-<br>enous non-<br>mammalian | 4.94E-02       |
| OSGIN1          | -0.149 | growth factor                                | 4.94E-02       |
| ZXDC            | 0.185  | transcription regu-<br>lator                 | 4.94E-02       |
| PROM1           | 1.112  | other                                        | 4.94E-02       |
| ASCC1           | 0.293  | transcription regu-<br>lator                 | 4.94E-02       |
| SLC13A5         |        | transporter                                  | 4.94E-02       |
| SLCO1C1         |        | transporter                                  | 4.94E-02       |
| TEX11           |        | other                                        | 4.94E-02       |
| ARID2           | 0.000  | transcription regu-<br>lator                 | 4.94E-02       |
| enecadin        |        | chemical drug                                | 4.94E-02       |
| ZNF24           | 0.217  | transcription regu-<br>lator                 | 4.94E-02       |
| C1GALT1         | -0.229 | enzyme                                       | 4.94E-02       |
| MITF-p300/CBP   |        | complex                                      | 4.94E-02       |
| sepantronium    |        | chemical drug                                | 4.94E-02       |
| firtecane pegol |        | chemical drug                                | 4.94E-02       |
| danusertib      |        | chemical drug                                | 4.94E-02       |
| olaparib        |        | chemical drug                                | 4.94E-02       |
| TBR1            |        | transcription regu-<br>lator                 | 4.94E-02       |
| ENPP1           | -0.618 | enzyme                                       | 4.94E-02       |
| CHFR            | -0.001 | enzyme                                       | 4.94E-02       |
| RNF6            | 0.041  | transcription regu-<br>lator                 | 4.94E-02       |
| PAK4            | -0.353 | kinase                                       | 4.94E-02       |
| ADRA2B          |        | G-protein coupled<br>receptor                | 4.94E-02       |
| HMG20B          | -0.196 | transcription regu-<br>lator                 | 4.94E-02       |
| MS4A2           |        | transmembrane                                | 4.94E-02       |

|                                                 |        |                               |          |
|-------------------------------------------------|--------|-------------------------------|----------|
|                                                 |        | receptor                      |          |
| CSH1/CSH2                                       |        | other                         | 4.94E-02 |
| TBX20                                           |        | transcription regu-<br>lator  | 4.94E-02 |
| Nppb                                            |        | other                         | 4.94E-02 |
| CHMP2B                                          | -0.230 | other                         | 4.94E-02 |
| miR-515-5p (and other miRNAs w/seed<br>UCUCCAA) |        | mature microRNA               | 4.94E-02 |
| miR-202-3p (and other miRNAs w/seed<br>GAGGUAU) |        | mature microRNA               | 4.94E-02 |
| miR-370-3p (and other miRNAs w/seed<br>CCUGCUG) |        | mature microRNA               | 4.94E-02 |
| miR-532-3p (miRNAs w/seed CUCCCAC)              |        | mature microRNA               | 4.94E-02 |
| TIAM1                                           | -0.928 | other                         | 4.94E-02 |
| SSTR5                                           |        | G-protein coupled<br>receptor | 4.94E-02 |
| IK                                              | 0.020  | cytokine                      | 4.94E-02 |
| TAF12                                           | 0.039  | transcription regu-<br>lator  | 4.94E-02 |
| parbendazole                                    |        | chemical reagent              | 4.94E-02 |
| DLL3                                            | -0.138 | other                         | 4.94E-02 |
| HSPB6                                           |        | other                         | 4.94E-02 |
| CANX                                            | 0.370  | other                         | 4.94E-02 |
| ARSA                                            | 0.434  | enzyme                        | 4.94E-02 |
| SIGMAR1                                         | -0.316 | transmembrane<br>receptor     | 4.94E-02 |
| DCC                                             |        | transmembrane<br>receptor     | 4.94E-02 |
| CELF2                                           | 1.075  | other                         | 4.94E-02 |
| GRM3                                            |        | G-protein coupled<br>receptor | 4.94E-02 |
| LSM1                                            | -0.298 | other                         | 4.94E-02 |
| TRPV5                                           |        | ion channel                   | 4.94E-02 |
| RGD1560225                                      |        | other                         | 4.94E-02 |
| GP1BA                                           | 0.452  | transmembrane<br>receptor     | 4.94E-02 |
| FOXH1                                           | 0.080  | transcription regu-<br>lator  | 4.94E-02 |
| ATRX                                            | 0.018  | transcription regu-<br>lator  | 4.94E-02 |
| SCTR                                            |        | G-protein coupled<br>receptor | 4.94E-02 |
| 2-[[4-[(e)-styryl]phenoxy]methyl]oxirane        |        | chemical reagent              | 4.94E-02 |
| S3I-1757                                        |        | chemical reagent              | 4.94E-02 |
| LGALS2                                          | -0.234 | other                         | 4.94E-02 |
| TSN                                             | -0.143 | other                         | 4.94E-02 |
| CEBPZ                                           | -0.116 | transcription regu-<br>lator  | 4.94E-02 |
| Mt3                                             |        | other                         | 4.94E-02 |
| APOC3                                           |        | transporter                   | 4.94E-02 |
| 1-[2,3-bis(furan-2-yl)quinoxalin-6-yl]-3-(4-    |        | chemical reagent              | 4.94E-02 |

|                                                               |        |                                     |          |
|---------------------------------------------------------------|--------|-------------------------------------|----------|
| <b>bromophenyl)urea</b>                                       |        |                                     |          |
| <b>3,6-bis(1-methyl-4-vinylpyridium)carbazole diiodide</b>    |        | chemical reagent                    | 4.94E-02 |
| <b>N-hydroxy-2,2-diphenylacetamide</b>                        |        | chemical reagent                    | 4.94E-02 |
| <b>3,6-bis(4-methyl-2-vinylpyrazinium)carbazole</b>           |        | chemical reagent                    | 4.94E-02 |
| <b>CKS2</b>                                                   | -1.418 | kinase                              | 4.94E-02 |
| <b>LY5</b>                                                    |        | chemical reagent                    | 4.94E-02 |
| <b>1-(2-hydroxy-5-methylphenyl)-3-phenyl-1,3-propanedione</b> |        | chemical reagent                    | 4.94E-02 |
| <b>abrocitinib</b>                                            |        | chemical drug                       | 4.94E-02 |
| <b>hydrochlorothiazide</b>                                    |        | chemical drug                       | 4.94E-02 |
| <b>TAS-103</b>                                                |        | chemical drug                       | 4.94E-02 |
| <b>pyridoxal phosphate</b>                                    |        | chemical - endogenous mammalian     | 4.94E-02 |
| <b>nevirapine</b>                                             |        | chemical drug                       | 4.94E-02 |
| <b>liarozole</b>                                              |        | chemical drug                       | 4.94E-02 |
| <b>pyridostigmine</b>                                         |        | chemical drug                       | 4.94E-02 |
| <b>(-)-isoproterenol</b>                                      |        | chemical drug                       | 4.94E-02 |
| <b>ammonia</b>                                                |        | chemical - endogenous mammalian     | 4.94E-02 |
| <b>chlorophyll a</b>                                          |        | chemical - endogenous non-mammalian | 4.94E-02 |
| <b>MS645</b>                                                  |        | chemical reagent                    | 4.94E-02 |
| <b>CCI-007</b>                                                |        | chemical reagent                    | 4.94E-02 |
| <b>leucine-2-alanine enkephalin</b>                           |        | chemical drug                       | 4.94E-02 |
| <b>myristoylated Protein Kinase C peptide inhibitor</b>       |        | chemical - kinase inhibitor         | 4.94E-02 |
| <b>insulin glargine</b>                                       |        | biologic drug                       | 4.94E-02 |
| <b>bisindolylmaleimide II</b>                                 |        | chemical - kinase inhibitor         | 4.94E-02 |
| <b>limonene</b>                                               |        | chemical - endogenous non-mammalian | 4.94E-02 |
| <b>colcemid</b>                                               |        | chemical - endogenous non-mammalian | 4.94E-02 |
| <b>trigonelline</b>                                           |        | chemical - endogenous mammalian     | 4.94E-02 |
| <b>galanthamine</b>                                           |        | chemical drug                       | 4.94E-02 |
| <b>durapatite</b>                                             |        | chemical - endogenous mammalian     | 4.94E-02 |
| <b>long chain fatty acid</b>                                  |        | chemical - endogenous mammalian     | 4.94E-02 |
| <b>gemcabene</b>                                              |        | chemical drug                       | 4.94E-02 |
| <b>Collagen type VI</b>                                       |        | complex                             | 4.94E-02 |
| <b>thymeleatoxin</b>                                          |        | chemical toxicant                   | 4.94E-02 |
| <b>karenitecin</b>                                            |        | chemical drug                       | 4.94E-02 |
| <b>Co2+</b>                                                   |        | chemical - endogenous mammalian     | 4.94E-02 |

|                                            |        |                                     |           |          |          |
|--------------------------------------------|--------|-------------------------------------|-----------|----------|----------|
| TLR7                                       |        | transmembrane receptor              | -1.982    | 5.72E-02 |          |
| RAS                                        |        | group                               | 1.964     | 8.94E-02 |          |
| ADORA2A                                    |        | G-protein coupled receptor          | 1.954     | 9.32E-02 |          |
| imatinib                                   |        | chemical drug                       | Activated | 2.042    | 1.07E-01 |
| fenofibrate                                |        | chemical drug                       | Inhibited | -2.390   | 1.22E-01 |
| E. coli serotype 0127B8 lipopolysaccharide |        | chemical - endogenous non-mammalian |           | 1.982    | 2.08E-01 |
| miR-1-3p (and other miRNAs w/seed GGAAUGU) |        | mature microRNA                     |           | 1.980    | 2.24E-01 |
| HNF1A                                      | -1.222 | transcription regulator             |           | 1.951    | 2.72E-01 |
| tazemetostat                               |        | chemical drug                       | Activated | 2.236    | 3.25E-01 |
| gentamicin                                 |        | chemical drug                       | Inhibited | -2.000   | 3.72E-01 |
| IL10RA                                     |        | transmembrane receptor              | Activated | 2.000    | 5.55E-01 |
